# Supplementary material for: Halogen bonding assisted site-selective C-3 triaryl methylation of indoles and N-triaryl methylation of imidazoles
Source: Royal Society of Chemistry journal article supplement (doi:10.1039/d3ob00783a), 2023-01-01
Supplement: d3ob00783a1.pdf [file d3ob00783a1.pdf]

## Supporting Information

### Halogen bonding assisted site-selective C-3 triaryl methylation of indoles and *N*-triaryl methylation of imidazoles

Dipika Konwar<sup>a</sup>, Pranamika Sarma<sup>b</sup>, Jagat Chandra Borah<sup>b</sup>, and Utpal Bora<sup>\*a</sup>

<sup>a</sup>Department of Chemical Sciences, Tezpur University, Napaam-784028, Assam, India.

<sup>b</sup>Chemical Biology Laboratory I, Institute of Advanced Study in Science and Technology,  
Paschim Boragaon, Guwahati-781035, Assam, India.

E-mail: [utbora@yahoo.co.in](mailto:utbora@yahoo.co.in), [ubora@tezu.ernet.in](mailto:ubora@tezu.ernet.in)

### Table of Contents

|   |                                                        |         |
|---|--------------------------------------------------------|---------|
| A | <sup>1</sup> H and <sup>13</sup> C NMR analytical data | S2-S13  |
| B | <sup>1</sup> H and <sup>13</sup> C NMR spectra         | S14-S51 |
| C | Mass Spectra                                           | S52-S64 |
| D | References                                             | S65     |

$^1\text{H}$  and  $^{13}\text{C}$  NMR analytical data:

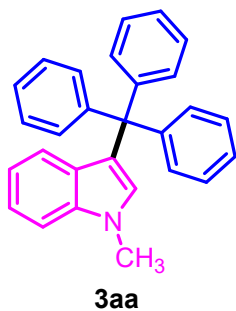

**1-methyl-3-trityl-1*H*-indole (3aa):** White solid (188 mg, 100% yield)<sup>1,2</sup>, mp 192-194 °C, purified by recrystallization.  $^1\text{H}$  NMR (400 MHz,  $\text{CDCl}_3$ ):  $\delta$  (ppm) 7.31–7.08 (m, 18H), 6.77 (t,  $J = 7.5$  Hz, 1H), 6.65 (d,  $J = 8.8$  Hz, 2H), 3.70 (s, 3H);  $^{13}\text{C}$  NMR (100 MHz,  $\text{CDCl}_3$ ):  $\delta$  (ppm) 146.7, 137.7, 130.8, 130.2, 128.3, 127.4, 126.0, 122.9, 122.3, 121.3, 118.7, 109.0, 59.5, 32.8.

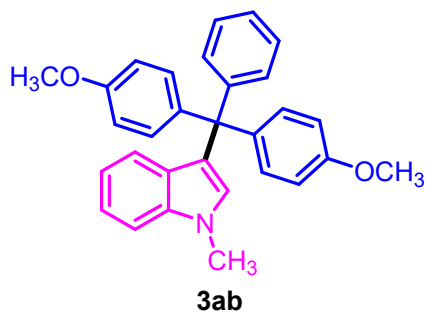

**3-(bis(4-methoxyphenyl)(phenyl)methyl)-1-methyl-1*H*-indole (3ab):** White solid (195 mg, 90% yield)<sup>3</sup>, mp 124-126 °C, purified by chromatography.  $^1\text{H}$  NMR (400 MHz,  $\text{CDCl}_3$ ):  $\delta$  (ppm) 7.32–7.13 (m, 12H), 6.86–6.76 (m, 5H), 6.72–6.65 (m, 2H), 3.81 (s, 6H), 3.74 (s, 3H);  $^{13}\text{C}$  NMR (100 MHz,  $\text{CDCl}_3$ ):  $\delta$  (ppm) 157.5, 147.2, 139.2, 137.7, 131.7, 130.6, 130.0, 128.3, 127.3, 125.9, 123.0, 122.8, 121.2, 118.7, 112.6, 109.0, 58.0, 55.2, 32.7.

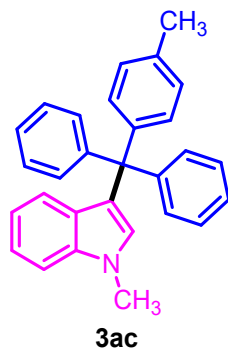

**3-(diphenyl(*p*-tolyl)methyl)-1-methyl-1*H*-indole (3ac):** White solid (195 mg, 100% yield)<sup>3</sup>, mp 261-263 °C, purified by re-crystallization.  $^1\text{H}$  NMR (400 MHz,  $\text{CDCl}_3$ ):  $\delta$  (ppm) 7.22–7.00 (m, 15H), 6.95 (d,  $J = 7.5$  Hz, 2H), 6.70 (t,  $J = 7.5$  Hz, 1H), 6.61–6.56 (m, 2H), 3.62 (s, 3H), 2.23 (s, 3H);  $^{13}\text{C}$  NMR (100 MHz,  $\text{CDCl}_3$ ):  $\delta$  (ppm) 146.8, 143.7, 137.7, 135.4, 130.8, 130.7, 130.2, 128.3, 128.1, 127.4, 125.9, 123.0, 122.4, 121.2, 118.6, 109.0, 59.1, 32.8, 21.0.

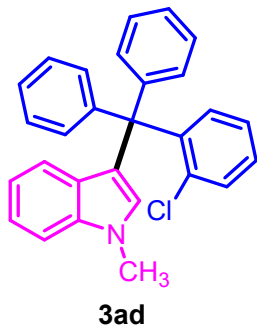

**3-((2-chlorophenyl)diphenylmethyl)-1-methyl-1H-indole (3ad):** White solid (167 mg, 82% yield)<sup>3</sup>, mp 124–126 °C, purified by chromatography. <sup>1</sup>H NMR (400 MHz, CDCl<sub>3</sub>): δ (ppm) 7.43–7.11 (m, 17H), 6.79 (t, *J* = 7.6 Hz, 1H), 6.69–6.57 (m, 2H), 3.74 (s, 3H); <sup>13</sup>C NMR (100 MHz, CDCl<sub>3</sub>): δ (ppm) 144.3, 144.0, 137.6, 136.4, 132.4, 131.9, 130.8, 128.2, 128.1, 127.3, 126.2, 126.0, 122.2, 121.2, 121.0, 118.8, 109.0, 59.8, 32.8.

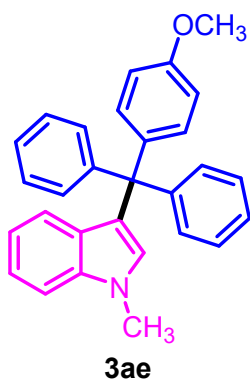

**3-((4-methoxyphenyl)diphenylmethyl)-1-methyl-1H-indole (3ae):** White solid (178 mg, 88% yield)<sup>3</sup>, mp 176–178 °C, purified by chromatography. <sup>1</sup>H NMR (400 MHz, CDCl<sub>3</sub>): δ (ppm) 7.32–7.22 (m, 12H), 7.20–7.14 (m, 3H), 6.85–6.79 (m, 3H), 6.71 (d, *J* = 9.7 Hz, 2H), 3.82 (s, 3H), 3.75 (s, 3H); <sup>13</sup>C NMR (100 MHz, CDCl<sub>3</sub>): δ (ppm) 157.6, 146.9, 138.9, 137.7, 131.8, 130.7, 130.1, 128.3, 127.4, 125.9, 123.0, 122.5, 121.2, 118.7, 112.6, 109.0, 58.7, 55.2, 32.8.

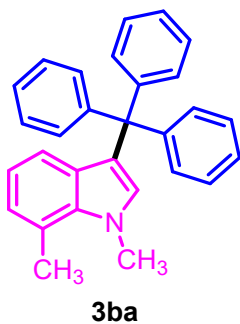

**1,7-dimethyl-3-trityl-1H-indole (3ba):** White solid (190 mg, 98% yield), mp 284–287 °C, purified by recrystallization. <sup>1</sup>H NMR (400 MHz, CDCl<sub>3</sub>): δ (ppm) 7.31–7.27 (m, 5H), 7.21 (s, 11H), 6.79 (d, *J* = 6.9 Hz, 1H), 6.61 (t, *J* = 7.6 Hz, 1H), 6.55–6.47 (m, 2H), 3.96 (s, 3H), 2.74 (s, 3H); <sup>13</sup>C NMR (100 MHz, CDCl<sub>3</sub>): δ (ppm) 146.6, 132.1, 130.8, 129.3, 128.0, 127.3, 125.9, 124.0, 121.8, 121.2, 120.8, 118.8, 59.4, 36.9, 19.9. HRMS (ESI) *m/z*: [M+H]<sup>+</sup> for C<sub>29</sub>H<sub>25</sub>N, calcd 388.2065; found 388.2027.

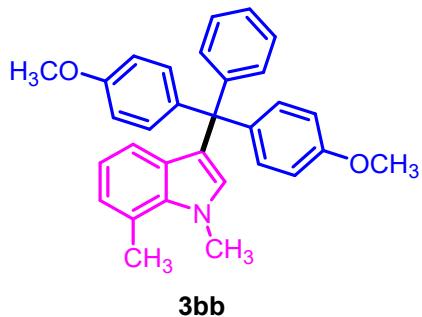

**3-(bis(4-methoxyphenyl)(phenyl)methyl)-1,7-dimethyl-1H-indole (3bb):** White solid (195 mg, 87% yield), mp 298-300 °C, purified by chromatography. <sup>1</sup>H NMR (400 MHz, CDCl<sub>3</sub>): δ (ppm) 7.14–7.09 (m, 5H), 7.08–7.00 (m, 4H), 6.73–6.65 (m, 5H), 6.58–6.53 (m, 1H), 6.43 (d, *J* = 8.7 Hz, 2H), 3.88 (d, *J* = 4.6 Hz, 3H), 3.69 (s, 6H), 2.67 (s, 3H); <sup>13</sup>C NMR (100 MHz, CDCl<sub>3</sub>): δ (ppm) 157.5, 147.1, 139.1, 136.5, 131.9, 131.7, 130.6, 129.3, 127.3, 125.8, 123.9, 122.3, 121.3, 120.8, 118.8, 112.6, 58.0, 55.2, 36.9, 19.9. HRMS (ESI) *m/z*: [M+H]<sup>+</sup> for C<sub>31</sub>H<sub>29</sub>NO<sub>2</sub>, calcd 448.2277; found 448.2234.

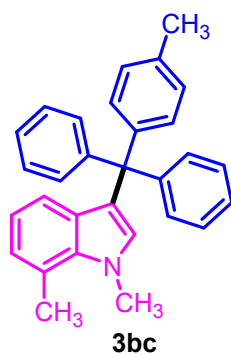

**3-(diphenyl(*p*-tolyl)methyl)-1,7-dimethyl-1H-indole (3bc):** White solid (153 mg, 76% yield), mp 146-148 °C, purified by chromatography. <sup>1</sup>H NMR (400 MHz, CDCl<sub>3</sub>): δ (ppm) 7.17–7.08 (m, 10H), 7.01 (d, *J* = 8.3 Hz, 2H), 6.94 (d, *J* = 8.2 Hz, 2H), 6.71 (d, *J* = 7.0 Hz, 1H), 6.57–6.51 (m, 1H), 6.47–6.40 (m, 2H), 3.88 (s, 3H), 2.67 (s, 3H), 2.23 (s, 3H); <sup>13</sup>C NMR (100 MHz, CDCl<sub>3</sub>): δ (ppm) 146.7, 143.6, 136.5, 135.4, 132.0, 130.8, 130.7, 129.3, 128.1, 127.3, 125.9, 124.0, 121.9, 121.3, 120.8, 118.8, 59.0, 36.9, 21.0, 19.9. HRMS (ESI) *m/z*: [M+H]<sup>+</sup> for C<sub>30</sub>H<sub>27</sub>N, calcd 402.2222; found 402.2186.

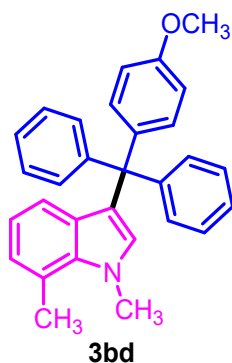

**3-((4-methoxyphenyl)diphenylmethyl)-1,7-dimethyl-1H-indole (3bd):** White solid (155 mg, 74% yield), mp 162-164 °C, purified by chromatography. <sup>1</sup>H NMR (400 MHz, CDCl<sub>3</sub>): δ (ppm) 7.17–7.07 (m, 10H), 7.06–7.01 (m, 2H), 6.75–6.64 (m, 3H), 6.58–6.51 (m, 1H), 6.42 (d, *J* = 8.9 Hz, 2H), 3.88 (s, 3H), 3.70 (d, *J* = 7.8 Hz, 3H), 2.67 (s, 3H); <sup>13</sup>C NMR (100 MHz, CDCl<sub>3</sub>): δ (ppm) 157.6, 146.9, 138.8, 136.5, 132.0, 131.8, 130.7, 129.3, 127.3, 125.9, 124.0, 122.0, 121.3, 120.8, 118.8, 112.6, 58.7,

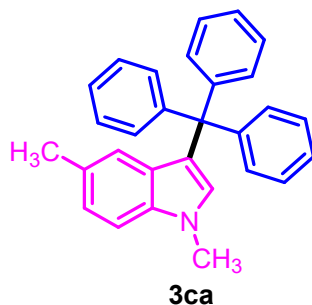

55.2, 36.9, 19.9. HRMS (ESI)  $m/z$ :  $[M+H]^+$  for  $C_{30}H_{27}NO$ , calcd 418.2171; found 418.2141.

**1,5-dimethyl-3-trityl-1H-indole (3ca):** White solid (192 mg, 99% yield), mp 307-309 °C, purified by recrystallization.  $^1H$  NMR (400 MHz,  $CDCl_3$ ):  $\delta$  (ppm) 7.32–7.26 (m, 5H), 7.21 (dd,  $J = 7.4, 2.6$  Hz, 10H), 7.14 (d,  $J = 8.3$  Hz, 1H), 6.97–6.92 (m, 1H), 6.60 (s, 1H), 6.40 (s, 1H), 3.67 (s, 3H), 2.14 (s, 3H);  $^{13}C$  NMR (100 MHz,  $CDCl_3$ ):  $\delta$  (ppm) 146.6, 136.2, 130.8, 130.4, 128.6, 127.9, 127.3, 125.9, 122.9, 122.5, 121.6, 108.6, 59.4, 32.8, 21.5. Anal. for  $C_{29}H_{25}N$ , calcd C, 89.88; H, 6.50; N, 3.61; found C, 89.58; H, 6.37; N, 3.30.

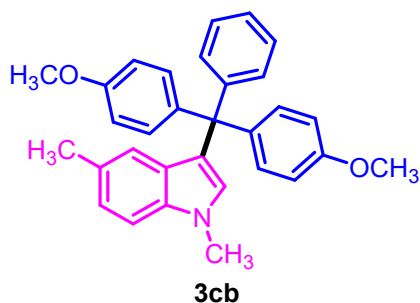

**3-(bis(4-methoxyphenyl)(phenyl)methyl)-1,5-dimethyl-1H-indole (3cb):** White solid (194 mg, 87% yield), mp 108-110 °C, purified by chromatography.  $^1H$  NMR (400 MHz,  $CDCl_3$ ):  $\delta$  (ppm) 7.29–7.22 (m, 5H), 7.17 (t,  $J = 8.1$  Hz, 5H), 6.99 (t,  $J = 8.3$  Hz, 1H), 6.80 (d,  $J = 8.9$  Hz, 4H), 6.61 (s, 1H), 6.48 (s, 1H), 3.82 (s, 6H), 3.71 (s, 3H), 2.20 (s, 3H);  $^{13}C$  NMR (100 MHz,  $CDCl_3$ ):  $\delta$  (ppm) 157.5, 147.3, 139.2, 136.2, 131.7, 130.7, 130.2, 128.5, 127.6, 127.3, 125.8, 122.9, 122.6, 122.2, 112.6, 108.6, 58.0, 55.2, 32.8, 21.5. HRMS (ESI)  $m/z$ :  $[M+H]^+$  for  $C_{31}H_{29}NO_2$ , calcd 448.2277; found 448.2231.

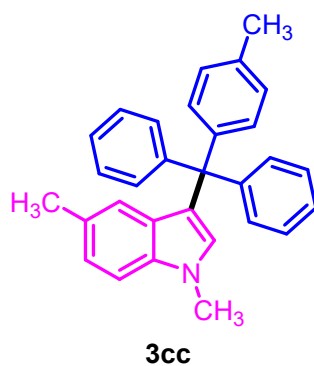

**3-(diphenyl(*p*-tolyl)methyl)-1,5-dimethyl-1H-indole (3cc):** White solid (155 mg, 77% yield), mp 106-108 °C, purified by chromatography.  $^1H$  NMR (400 MHz,  $CDCl_3$ ):  $\delta$  (ppm) 7.17–7.00 (m, 13H), 6.95 (d,  $J = 8.3$  Hz, 2H), 6.88–6.84 (m, 1H), 6.52 (s, 1H), 6.34 (s, 1H), 3.59 (s, 3H), 2.24 (s, 3H), 2.07 (s, 3H);  $^{13}C$  NMR (100 MHz,  $CDCl_3$ ):  $\delta$  (ppm) 146.8, 143.8, 136.2, 135.3, 130.8, 130.7, 130.3, 128.5, 128.1, 127.6, 127.3, 125.8, 122.9, 122.6,

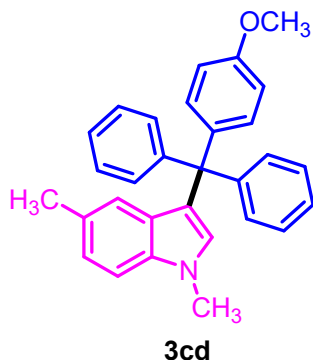

121.8, 108.6, 59.1, 32.8, 21.5, 21.0. HRMS (ESI)  $m/z$ :  $[M+H]^+$  for  $C_{30}H_{27}N$ , calcd 402.2222; found 402.2186.

**3-((4-methoxyphenyl)diphenylmethyl)-1,5-dimethyl-**

**1H-indole (3cd):** White solid (149 mg, 71% yield), mp 251-254 °C, purified by chromatography.  $^1H$  NMR (400 MHz,  $CDCl_3$ ):  $\delta$  (ppm) 7.29–7.13 (m, 14H), 6.97 (d,  $J = 8.3$  Hz, 1H), 6.80 (t,  $J = 6.0$  Hz, 2H), 6.62 (s, 1H), 6.45 (s, 1H), 3.81 (s, 3H), 3.71 (s, 3H), 2.18 (s, 3H);  $^{13}C$  NMR (100 MHz,  $CDCl_3$ ):  $\delta$  (ppm) 157.5, 147.0, 138.9, 136.2, 131.8, 130.7, 130.2, 128.5, 127.6, 127.3, 125.8, 122.9, 122.6, 121.9, 112.6, 108.6, 58.7, 55.2, 32.8, 21.5. Anal. for  $C_{30}H_{27}NO$ , calcd C, 86.30; H, 6.52; N, 3.35; found C, 86.35; H, 7.03; N, 2.81.

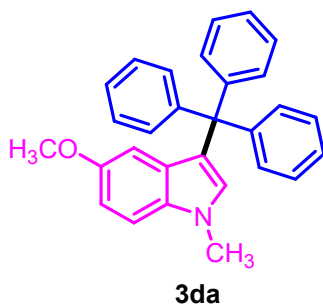

**5-methoxy-1-methyl-3-trityl-1H-indole (3da):** White solid (200 mg, 99% yield), mp 378-380 °C, purified by recrystallization.  $^1H$  NMR (400 MHz,  $CDCl_3$ ):  $\delta$  (ppm) 7.31–7.27 (m, 2H), 7.24–7.18 (m, 14H), 7.12 (d,  $J = 8.8$  Hz, 1H), 6.76 (dd,  $J = 8.8, 2.5$  Hz, 1H), 6.64 (s, 1H), 6.03 (d,  $J = 2.4$  Hz, 1H), 3.67 (s, 3H), 3.37 (s, 3H);  $^{13}C$  NMR (100 MHz,  $CDCl_3$ ):  $\delta$  (ppm) 153.1, 146.6, 133.1, 130.8, 128.6, 127.9, 127.4, 125.9, 121.7, 111.6, 109.5, 104.4, 59.4, 55.5, 32.9. HRMS (ESI)  $m/z$ :  $[M+H]^+$  for  $C_{29}H_{25}N$ , calcd 404.2014; found 404.1987.

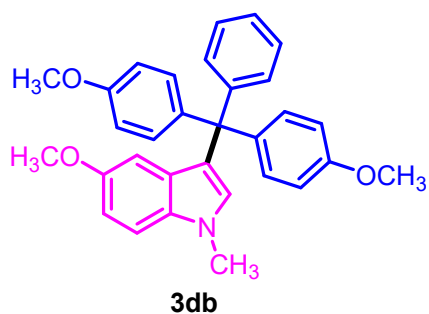

**3-(bis(4-methoxyphenyl)(phenyl)methyl)-5-methoxy-1-methyl-1H-indole (3db):** White solid (202 mg, 87% yield)<sup>3</sup>, mp 134-136 °C, purified by chromatography.  $^1H$  NMR (400 MHz,  $CDCl_3$ ):  $\delta$  (ppm) 7.31–7.15 (m, 10H), 6.83 (t,  $J = 5.8$  Hz, 5H), 6.68 (s, 1H), 6.13 (d,  $J = 1.8$  Hz, 1H), 3.82 (s, 6H), 3.71 (s, 3H), 3.46 (s, 3H);  $^{13}C$  NMR (100 MHz,  $CDCl_3$ ):  $\delta$  (ppm) 157.6, 153.0, 147.2, 139.2, 133.1, 131.7, 130.7, 130.5, 128.6, 127.4, 125.9, 122.4,

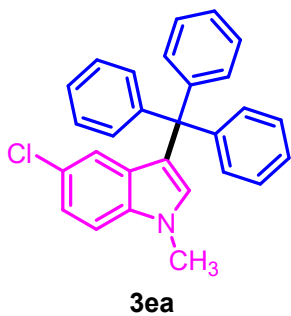

112.6, 111.6, 109.7, 104.5, 58.0, 55.2, 32.9.

**5-chloro-1-methyl-3-trityl-1H-indole (3ea):** White solid (194 mg, 95% yield), mp 354-356 °C, purified by chromatography. <sup>1</sup>H NMR (400 MHz, CDCl<sub>3</sub>): δ (ppm) 7.34–7.16 (m, 16H), 7.09 (dd, *J* = 8.7, 2.0 Hz, 1H), 6.74 (s, 1H), 6.62 (d, *J* = 1.9 Hz, 1H), 3.72 (s, 3H); <sup>13</sup>C NMR (100 MHz, CDCl<sub>3</sub>): δ (ppm) 146.2, 136.1, 131.3, 130.7, 129.2, 128.0, 127.5, 126.2, 124.5, 122.0, 121.7, 110.1, 59.3, 33.0. Anal. for C<sub>28</sub>H<sub>22</sub>ClN calcd C, 82.44; H, 5.44; N, 3.43; found C, 81.89; H, 5.31; N, 3.10.

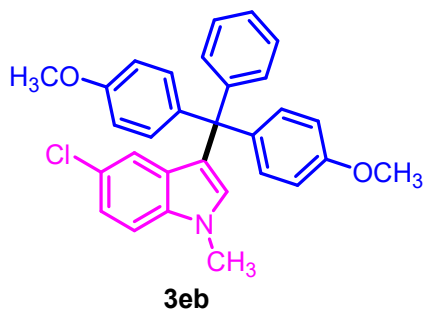

**3-(bis(4-methoxyphenyl)(phenyl)methyl)-5-chloro-1-methyl-1H-indole (3eb):** White solid (197 mg, 84% yield)<sup>3</sup>, mp 216-218 °C, purified by chromatography. <sup>1</sup>H NMR (400 MHz, CDCl<sub>3</sub>): δ (ppm) 7.17–6.95 (m, 12H), 6.68 (d, *J* = 8.9 Hz, 4H), 6.59–6.53 (m, 2H), 3.70 (s, 6H), 3.59 (s, 3H); <sup>13</sup>C NMR (100 MHz, CDCl<sub>3</sub>): δ (ppm) 157.7, 146.8, 138.7, 136.1, 131.6, 131.2, 130.5, 129.2, 127.5, 126.0, 124.5, 122.6, 122.0, 121.7, 112.7, 110.1, 57.9, 55.2, 32.9.

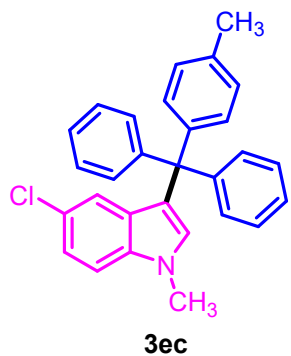

**5-chloro-3-(diphenyl(*p*-tolyl)methyl)-1-methyl-1H-indole (3ec):** White solid (184 mg, 87% yield), mp 114-116 °C, purified by chromatography. <sup>1</sup>H NMR (400 MHz, CDCl<sub>3</sub>): δ (ppm) 7.19–6.94 (m, 16H), 6.62 (s, 1H), 6.52 (s, 1H), 3.61 (s, 3H), 2.25 (s, 3H); <sup>13</sup>C NMR (100 MHz, CDCl<sub>3</sub>): δ (ppm) 146.4, 143.3, 136.1, 135.6, 131.3, 130.7, 130.5, 129.2, 128.2, 127.5, 126.1, 124.5, 122.2, 122.0, 121.7, 110.1, 58.9, 32.9, 21.0. HRMS (ESI) *m/z*: [M+H]<sup>+</sup> for C<sub>29</sub>H<sub>24</sub>ClN, calcd 421.1676; 421.1561.

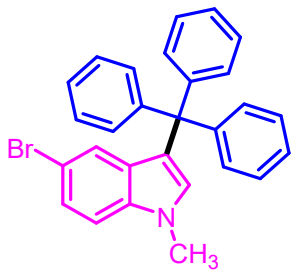

**3fa**

**5-bromo-1-methyl-3-trityl-1H-indole (3fa):** White solid (82 mg, 36% yield), mp 351-354 °C, purified by chromatography.  $^1\text{H}$  NMR (400 MHz,  $\text{CDCl}_3$ ):  $\delta$  (ppm) 7.19–7.10 (m, 16H), 7.04 (d,  $J = 8.7$  Hz, 1H), 6.64 (d,  $J = 1.8$  Hz, 1H), 6.60 (d,  $J = 3.6$  Hz, 1H), 3.61 (s, 3H);  $^{13}\text{C}$  NMR (100 MHz,  $\text{CDCl}_3$ ):  $\delta$  (ppm) 146.2, 136.4, 131.2, 130.7, 129.8, 127.5, 126.1, 125.0, 124.3, 122.0, 112.2, 110.6, 59.3, 32.9. Anal. for  $\text{C}_{28}\text{H}_{22}\text{BrN}$  calcd C, 74.34; H, 4.90; N, 3.10; found C, 74.01; H, 4.71; N, 2.83.

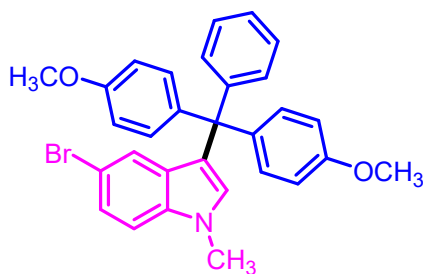

**3fb**

**3-(bis(4-methoxyphenyl)(phenyl)methyl)-5-bromo-1-methyl-1H-indole (3fb):** White solid (162 mg, 63% yield)<sup>3</sup>, mp 171-173 °C, purified by chromatography.  $^1\text{H}$  NMR (400 MHz,  $\text{CDCl}_3$ ):  $\delta$  (ppm) 7.30–7.10 (m, 12H), 6.85–6.77 (m, 5H), 6.68 (s, 1H), 3.82 (s, 6H), 3.71 (s, 3H);  $^{13}\text{C}$  NMR (100 MHz,  $\text{CDCl}_3$ ):  $\delta$  (ppm) 157.7, 146.8, 138.7, 136.4, 131.6, 131.0, 130.5, 129.8, 127.5, 126.0, 125.1, 124.2, 122.6, 112.7, 112.2, 110.6, 57.9, 55.2, 32.9.

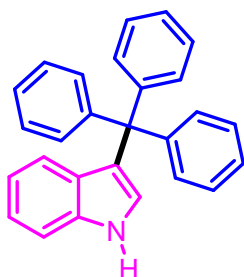

**3ga**

**3-trityl-1H-indole (3ga):** White solid (177 mg, 98% yield)<sup>4</sup>, mp 319-322 °C, purified by re-crystallization.  $^1\text{H}$  NMR (400 MHz,  $\text{CDCl}_3$ ):  $\delta$  (ppm) 7.90 (s, 1H), 7.33–7.16 (m, 17H), 7.08 (t,  $J = 7.6$  Hz, 1H), 6.78 (dd,  $J = 11.0, 4.3$  Hz, 2H), 6.67 (d,  $J = 8.1$  Hz, 1H);  $^{13}\text{C}$  NMR (100 MHz,  $\text{CDCl}_3$ ):  $\delta$  (ppm) 146.5, 137.0, 130.8, 128.0, 127.8, 127.4, 126.0, 125.5, 124.0, 122.8, 121.7, 119.2, 111.0, 59.5.

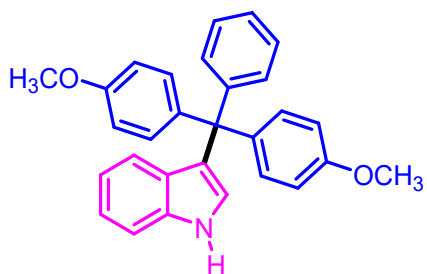

**3gb**

**3-(bis(4-methoxyphenyl)(phenyl)methyl)-1H-indole (3gb):** White solid (187 mg, 89% yield)<sup>3</sup>, mp 162-164 °C, purified by chromatography.  $^1\text{H}$  NMR (400 MHz,  $\text{CDCl}_3$ ):  $\delta$  (ppm) 7.96 (s, 1H), 7.36–7.10 (m, 13H), 6.88–6.71 (m, 8H), 3.81 (s, 6H);  $^{13}\text{C}$  NMR (100 MHz,  $\text{CDCl}_3$ ):  $\delta$  (ppm) 157.6, 147.1, 139.0, 137.0, 131.7, 130.6, 127.8, 127.4, 125.9, 125.3, 124.5, 122.9, 121.7, 119.2, 112.6,



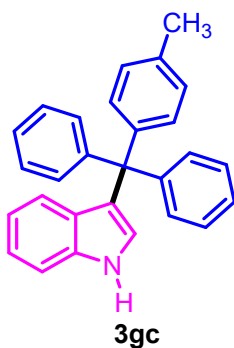

110.9, 58.0, 55.2.

**3-(diphenyl(*p*-tolyl)methyl)-1*H*-indole (3gc):** White solid (159 mg, 85% yield), mp 133-135 °C, purified by chromatography. <sup>1</sup>H NMR (400 MHz, CDCl<sub>3</sub>): δ (ppm) 7.68 (s, 1H), 7.20–6.95 (m, 19H), 6.91 (d, *J* = 8.1 Hz, 2H), 6.67 (m, 2H), 6.59 (d, *J* = 8.1 Hz, 1H), 2.20 (s, 3H); <sup>13</sup>C NMR (100 MHz, CDCl<sub>3</sub>): δ (ppm) 146.7, 143.5, 137.0, 135.5, 130.8, 130.7, 128.7, 128.1, 127.9, 127.4, 127.2, 126.0, 125.5, 124.1, 122.9, 121.7, 119.2, 110.9, 59.1, 21.0. HRMS (ESI) *m/z*: [M+H]<sup>+</sup> for C<sub>28</sub>H<sub>23</sub>N, calcd 374.1909; found 374.1879.

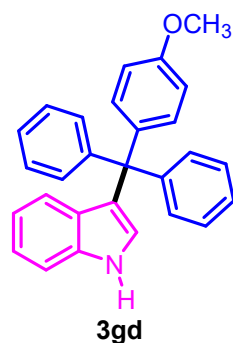

**3-((4-methoxyphenyl)diphenylmethyl)-1*H*-indole (3gd):** White solid (177 mg, 91% yield)<sup>5</sup>, 140-142 °C, purified by chromatography. <sup>1</sup>H NMR (400 MHz, CDCl<sub>3</sub>): δ (ppm) 7.83 (s, 1H), 7.25–7.18 (m, 2H), 7.17–7.07 (m, 10H), 7.06–6.98 (m, 3H), 6.77–6.58 (m, 5H), 3.68 (d, *J* = 4.3 Hz, 3H); <sup>13</sup>C NMR (100 MHz, CDCl<sub>3</sub>): δ (ppm) 157.6, 146.8, 138.7, 137.0, 131.8, 137.0, 131.8, 130.7, 127.9, 127.8, 127.4, 126.0, 125.4, 124.2, 122.9, 121.7, 119.2, 112.6, 111.0, 58.7, 55.2.

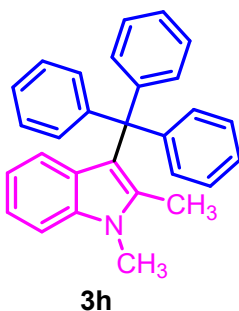

**1,2-dimethyl-3-trityl-1*H*-indole (3h):** White solid (121 mg, 62% yield), mp 323-325 °C, purified by chromatography. <sup>1</sup>H NMR (400 MHz, CDCl<sub>3</sub>): δ (ppm) 7.43 (m, 6H), 7.24–7.11 (m, 10H), 7.03 (m, 1H), 6.73 (m, 1H), 6.40 (d, *J* = 8.2 Hz, 1H), 3.60 (s, 3H), 1.82 (s, 3H); <sup>13</sup>C NMR (100 MHz, CDCl<sub>3</sub>): δ (ppm) 147.1, 136.8, 134.9, 130.6, 127.4, 125.5, 122.0, 120.0, 118.3, 117.7, 108.3, 60.3, 29.5, 13.8. Anal. for C<sub>29</sub>H<sub>25</sub>N calcd C, 89.88; H, 6.50; N, 3.61; found C, 89.71; H, 6.35; N, 3.38.

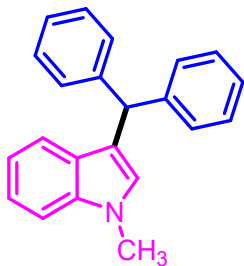

**3i**

**3-benzhydryl-1-methyl-1H-indole (3i):** White solid (86 mg, 58% yield)<sup>3</sup>, mp 104-107 °C, purified by chromatography. <sup>1</sup>H NMR (400 MHz, CDCl<sub>3</sub>): δ (ppm) 7.21–7.05 (m, 15H), 6.90–6.83 (m, 1H), 6.30 (s, 1H), 5.57 (s, 1H), 3.53 (s, 3H); <sup>13</sup>C NMR (100 MHz, CDCl<sub>3</sub>): δ (ppm) 144.2, 142.3, 137.6, 129.1, 128.8, 128.5, 128.4, 127.4, 126.3, 121.7, 120.1, 118.9, 109.2, 48.9, 32.7.

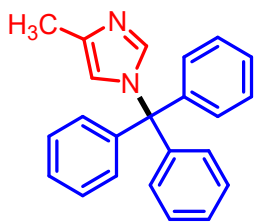

**4a**

**4-methyl-1-trityl-1H-imidazole (4a):** White solid (131 mg, 81% yield)<sup>6</sup>, mp 341-344 °C, purified by chromatography. <sup>1</sup>H NMR (400 MHz, CDCl<sub>3</sub>): δ (ppm) 7.38–7.32 (m, 10H), 7.17 (dd, *J* = 6.2, 3.5 Hz, 6H), 6.54 (s, 1H), 2.22 (s, 3H); <sup>13</sup>C NMR (100 MHz, CDCl<sub>3</sub>): δ (ppm) 142.6, 138.2, 137.1, 129.8, 128.0, 127.9, 118.2, 75.0, 13.9.

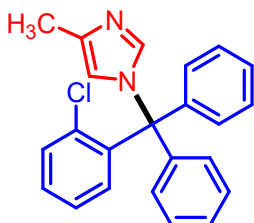

**4b**

**1-((2-chlorophenyl)diphenylmethyl)-4-methyl-1H-imidazole (4b):** White solid (126 mg, 70% yield)<sup>7</sup>, mp 189-191 °C, purified by chromatography. <sup>1</sup>H NMR (400 MHz, CDCl<sub>3</sub>): δ (ppm) 7.32–7.19 (m, 9H), 7.18–7.07 (m, 5H), 6.85 (dd, *J* = 8.0, 1.6 Hz, 1H), 6.34 (s, 1H), 2.09 (s, 3H); <sup>13</sup>C NMR (100 MHz, CDCl<sub>3</sub>): δ (ppm) 141.0, 140.3, 138.2, 137.0, 135.5, 132.2, 130.4, 130.2, 129.8, 128.1, 128.0, 127.0, 118.0, 75.0, 13.7.

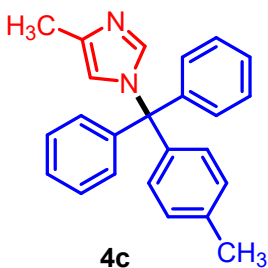

**4c**

**1-(diphenyl(*p*-tolyl)methyl)-4-methyl-1H-imidazole (4c):** White solid (95 mg, 56% yield), mp 239-241 °C, purified by chromatography. <sup>1</sup>H NMR (400 MHz, CDCl<sub>3</sub>): δ (ppm) 7.39–7.27 (m, 7H), 7.16 (m, 6H), 7.04 (d, *J* = 8.3 Hz, 2H), 6.54 (s, 1H), 2.38 (s, 3H), 2.22 (s, 3H); <sup>13</sup>C NMR (100 MHz, CDCl<sub>3</sub>): δ (ppm) 142.8, 139.7, 138.2, 137.7, 137.1, 129.8, 128.7, 127.9, 118.1, 74.8, 21.0, 13.9. HRMS (ESI) *m/z*: [M+H]<sup>+</sup> for C<sub>24</sub>H<sub>22</sub>N<sub>2</sub>, calcd 339.1861; found 339.1835.

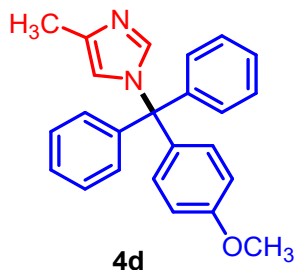

**1-((4-methoxyphenyl)diphenylmethyl)-4-methyl-1H-imidazole (4d):** White solid (36 mg, 20% yield), mp 219–221 °C, purified by chromatography. <sup>1</sup>H NMR (400 MHz, CDCl<sub>3</sub>): δ (ppm) 7.37–7.30 (m, 7H), 7.18–7.12 (m, 4H), 7.09–7.05 (m, 2H), 6.88–6.83 (m, 2H), 6.53 (s, 1H), 3.83 (s, 3H), 2.22 (s, 3H); <sup>13</sup>C NMR (100 MHz, CDCl<sub>3</sub>): δ (ppm) 159.0, 142.9, 138.1, 137.0, 134.7, 131.2, 129.7, 127.9, 118.1, 113.2, 74.6, 55.3, 13.9. HRMS (ESI) m/z: [M+H]<sup>+</sup> for C<sub>24</sub>H<sub>22</sub>N<sub>2</sub>O, calcd 355.1810; found 355.1783.

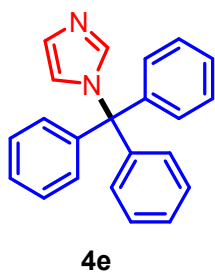

**1-trityl-1H-imidazole (4e):** White solid (59 mg, 38% yield)<sup>8,9</sup>, mp 337–339 °C, purified by chromatography. <sup>1</sup>H NMR (400 MHz, CDCl<sub>3</sub>): δ (ppm) 7.39 (s, 1H), 7.29–7.21 (m, 9H), 7.10–7.02 (m, 6H), 6.99 (s, 1H), 6.75 (s, 1H); <sup>13</sup>C NMR (100 MHz, CDCl<sub>3</sub>): δ (ppm) 142.5, 139.0, 129.8, 128.3, 128.1, 121.7, 75.2.

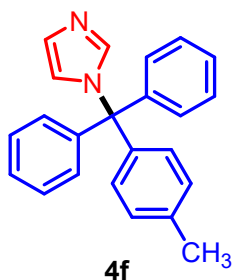

**1-(diphenyl(*p*-tolyl)methyl)-1H-imidazole (4f):** White solid (107 mg, 66% yield)<sup>9</sup>, mp 220–222 °C, purified by chromatography. <sup>1</sup>H NMR (400 MHz, CDCl<sub>3</sub>): δ (ppm) 7.49 (s, 1H), 7.39–7.28 (m, 6H), 7.16 (m, 6H), 7.10–7.02 (m, 3H), 6.85 (s, 1H), 2.38 (s, 3H); <sup>13</sup>C NMR (100 MHz, CDCl<sub>3</sub>): δ (ppm) 142.7, 139.6, 139.0, 137.9, 129.8, 128.7, 128.2, 128.0, 127.8, 121.7, 75.1, 21.0.

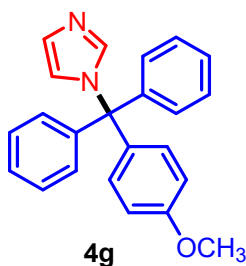

**1-((4-methoxyphenyl)diphenylmethyl)-1H-imidazole (4g):** White solid (68 mg, 40% yield)<sup>10</sup>, mp 223–225 °C, purified by chromatography. <sup>1</sup>H NMR (400 MHz, CDCl<sub>3</sub>): δ (ppm) 7.37 (s, 1H), 7.27–7.18 (m, 6H), 7.12–7.01 (m, 4H), 7.00–6.95 (m, 3H), 6.79–6.70 (m, 3H), 3.72 (s, 3H); <sup>13</sup>C NMR (100 MHz, CDCl<sub>3</sub>): δ (ppm) 159.1, 142.8, 139.0, 134.6, 131.2, 129.7, 128.2, 128.0, 121.7, 113.3, 74.9, 55.3.

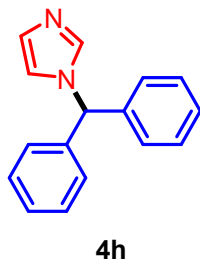

**1-benzhydryl-1H-imidazole (4h):** Colourless liquid (33 mg, 28% yield), purified by chromatography.  $^1\text{H}$  NMR (400 MHz,  $\text{CDCl}_3$ ):  $\delta$  (ppm) 7.33 (d,  $J = 8.5$  Hz, 1H), 7.32–7.23 (m, 6H), 7.03 (dd,  $J = 4.9, 2.7$  Hz, 5H), 6.77 (s, 1H), 6.44 (s, 1H);  $^{13}\text{C}$  NMR (100 MHz,  $\text{CDCl}_3$ ):  $\delta$  (ppm) 139.1, 137.4, 129.2, 128.9, 128.4, 128.1, 65.1. HRMS (ESI)  $m/z$ :  $[\text{M}+\text{H}]^+$  for  $\text{C}_{16}\text{H}_{14}\text{N}_2$ , calcd 235.1235; found 235.1215.

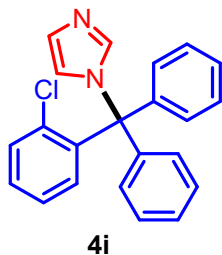

**1-((2-chlorophenyl)diphenylmethyl)-1H-imidazole (4i):** White solid (116 mg, 67% yield)<sup>3</sup>, mp 125-128 °C, purified by chromatography.  $^1\text{H}$  NMR (400 MHz,  $\text{CDCl}_3$ ):  $\delta$  (ppm) 7.38 (s, 1H), 7.32 (dd,  $J = 7.8, 1.4$  Hz, 1H), 7.26–7.20 (m, 7H), 7.18–7.07 (m, 5H), 6.96 (s, 1H), 6.84 (dd,  $J = 8.0, 1.6$  Hz, 1H), 6.66 (s, 1H);  $^{13}\text{C}$  NMR (100 MHz,  $\text{CDCl}_3$ ):  $\delta$  (ppm) 140.9, 140.4, 139.1, 135.6, 132.2, 130.4, 130.2, 129.9, 128.4, 128.2, 128.0, 127.0, 121.6, 75.1.

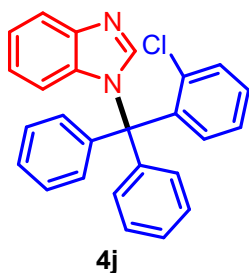

**1-((2-chlorophenyl)diphenylmethyl)-1H-benzo[d]imidazole (4j):** White solid (121 mg, 61% yield), mp 255-258 °C, purified by chromatography.  $^1\text{H}$  NMR (400 MHz,  $\text{CDCl}_3$ ):  $\delta$  (ppm) 8.02 (s, 1H), 7.80 (d,  $J = 8.1$  Hz, 1H), 7.44–7.14 (m, 15H), 6.95–6.86 (m, 1H), 6.45 (d,  $J = 8.3$  Hz, 1H);  $^{13}\text{C}$  NMR (100 MHz,  $\text{CDCl}_3$ ):  $\delta$  (ppm) 144.8, 144.5, 135.9, 134.6, 132.5, 131.4, 130.5, 129.9, 128.2, 128.1, 126.8, 122.5, 122.1, 120.3, 114.8, 75.6. HRMS (ESI)  $m/z$ :  $[\text{M}+\text{H}]^+$  for  $\text{C}_{26}\text{H}_{19}\text{ClN}_2$ , calcd 395.1315; found 395.1280.

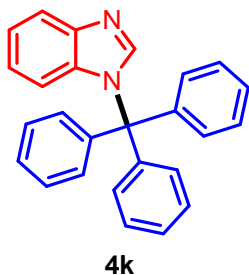

**1-trityl-1H-benzo[d]imidazole (4k):** White solid (44 mg, 24% yield)<sup>10,11</sup>, mp 228-230 °C, purified by chromatography. <sup>1</sup>H NMR (400 MHz, CDCl<sub>3</sub>):  $\delta$  (ppm) 7.92 (s, 1H), 7.81 (d,  $J$  = 8.1 Hz, 1H), 7.37–7.30 (m, 9H), 7.24–7.16 (m, 7H), 6.92 (t,  $J$  = 7.7 Hz, 1H), 6.50 (d,  $J$  = 8.3 Hz, 1H); <sup>13</sup>C NMR (100 MHz, CDCl<sub>3</sub>):  $\delta$  (ppm) 144.5, 144.1, 141.3, 134.7, 130.0, 128.2, 128.0, 122.4, 122.1, 120.2, 115.4, 75.5.

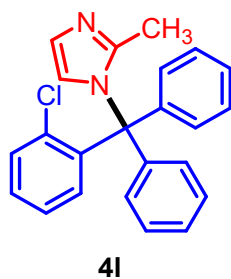

**1-((2-chlorophenyl)diphenylmethyl)-2-methyl-1H-imidazole (4l):** White solid (95 mg, 53% yield), mp 276-278 °C, purified by chromatography. <sup>1</sup>H NMR (400 MHz, CDCl<sub>3</sub>):  $\delta$  (ppm) 7.35 (dd,  $J$  = 7.8, 1.5 Hz, 1H), 7.29–7.17 (m, 8H), 7.06 (dd,  $J$  = 18.4, 5.6 Hz, 5H), 6.81 (d,  $J$  = 1.5 Hz, 1H), 6.74 (s, 1H), 1.49 (s, 3H); <sup>13</sup>C NMR (100 MHz, CDCl<sub>3</sub>):  $\delta$  (ppm) 146.8, 139.8, 135.8, 132.6, 130.8, 130.7, 129.8, 128.0, 127.8, 126.8, 124.9, 122.1, 75.2, 17.1. Anal. for C<sub>23</sub>H<sub>19</sub>ClN<sub>2</sub> calcd C, 76.98; H, 5.34; N, 7.81; found C, 76.78; H, 5.30; N, 7.68.

# NMR spectra

3aa.

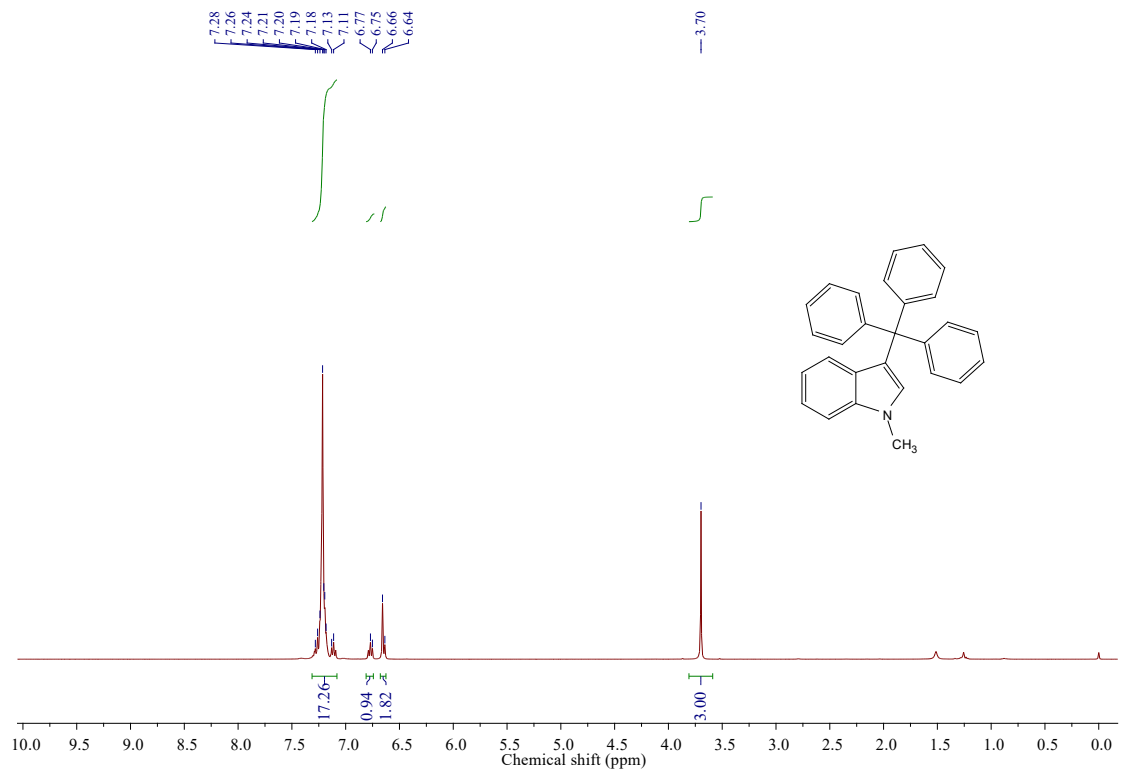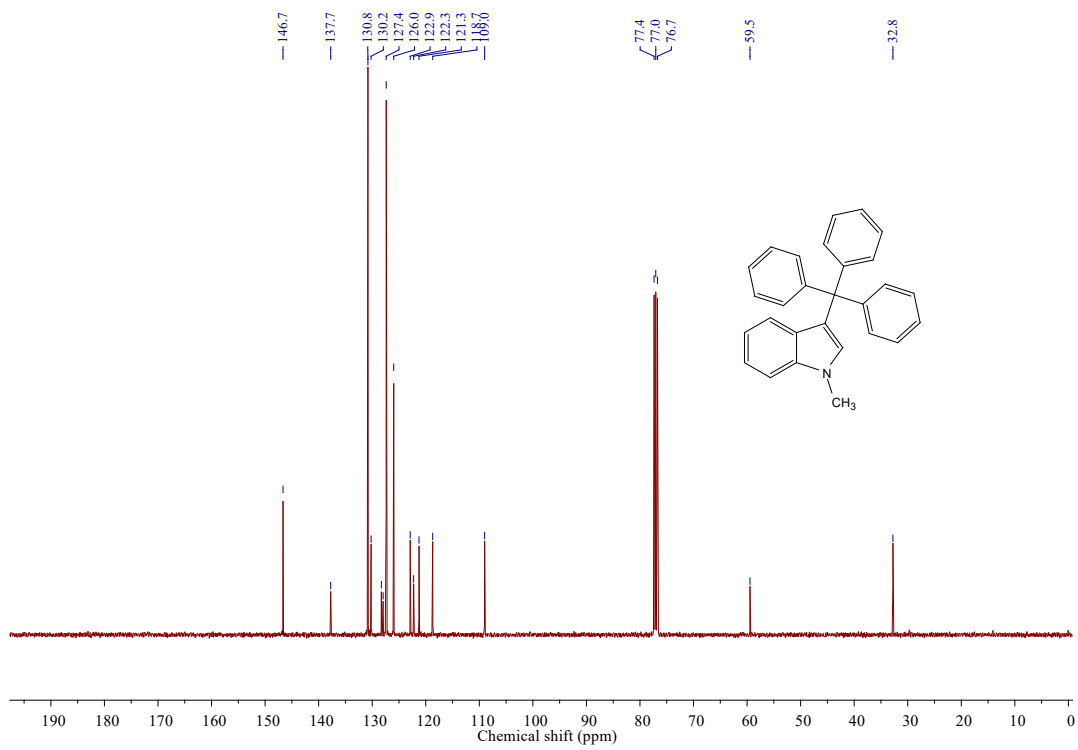

3ab.

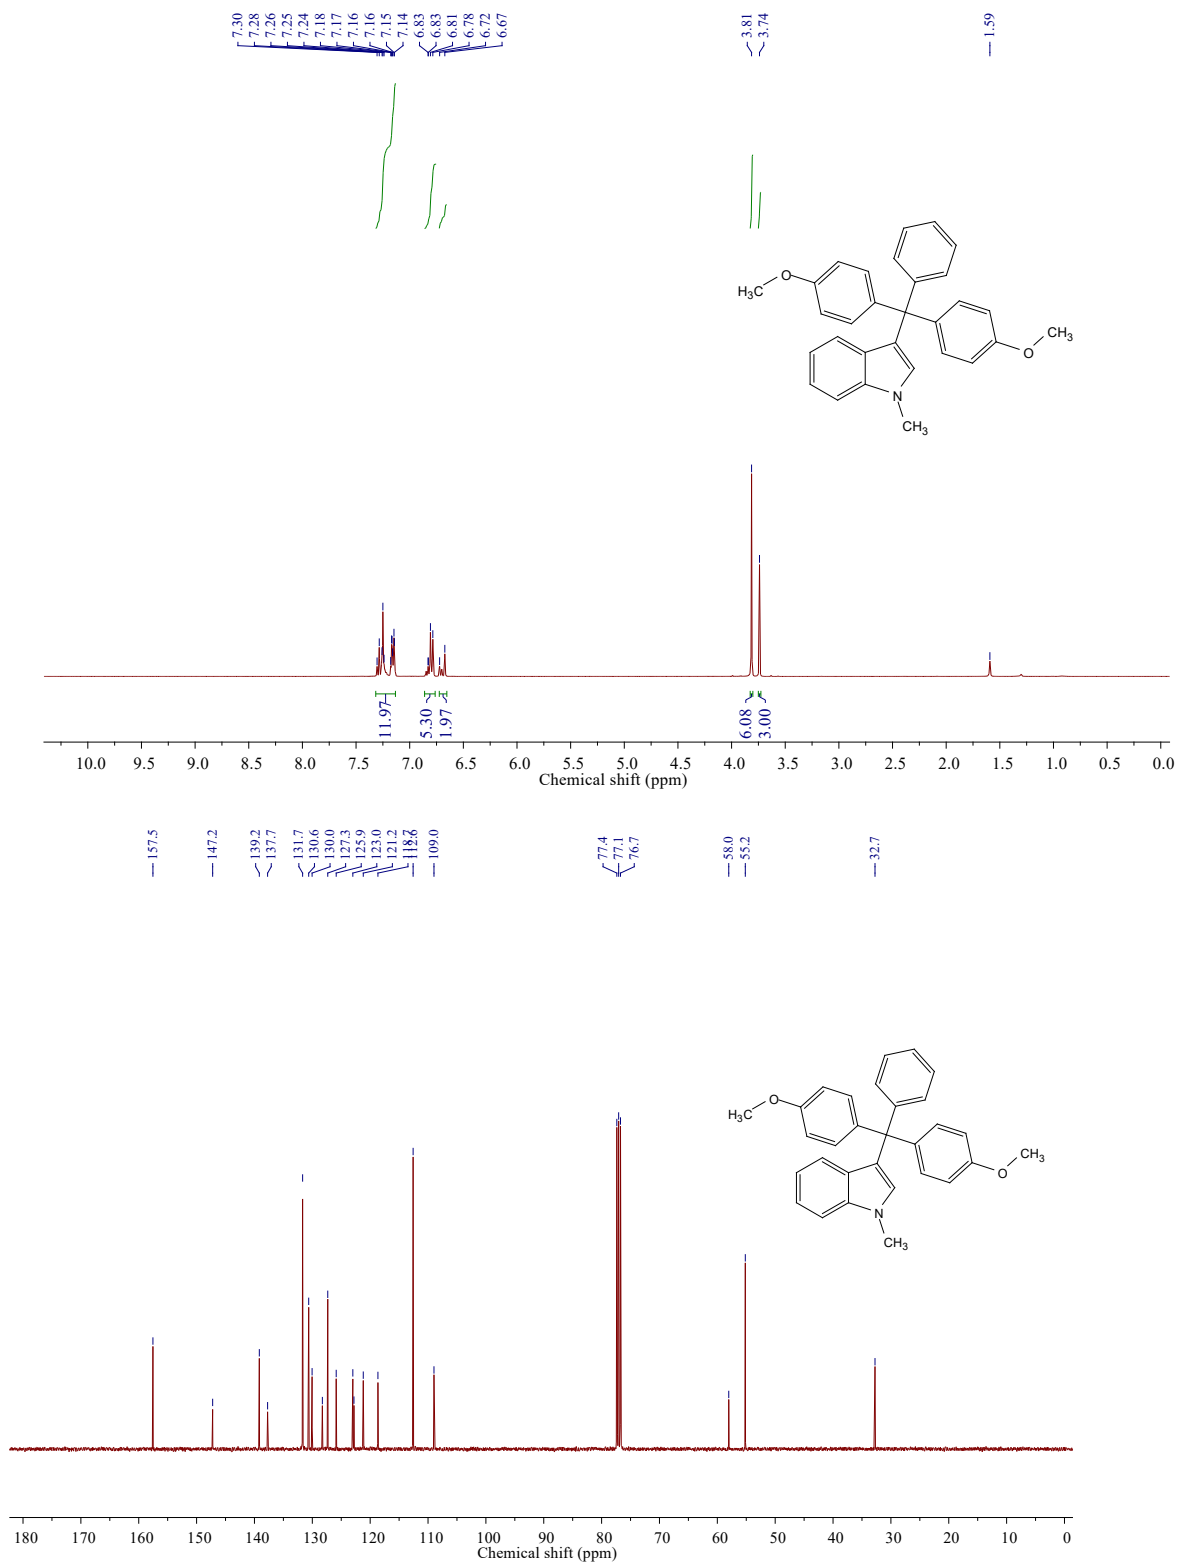

3ac.

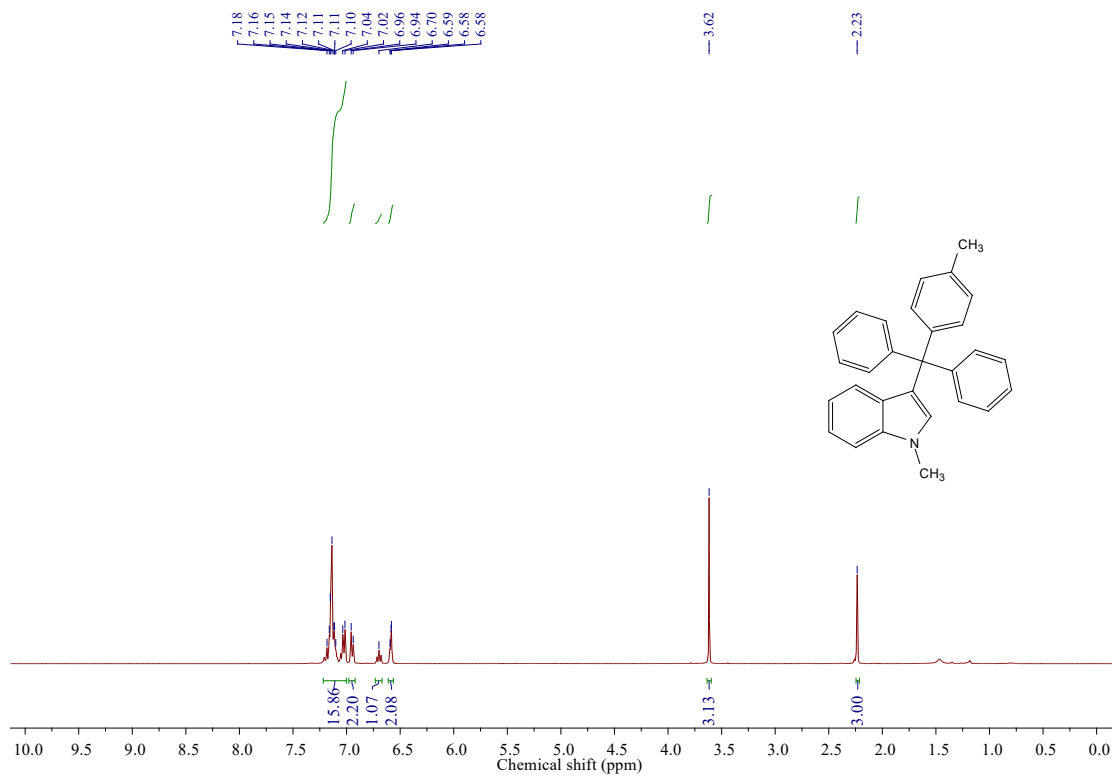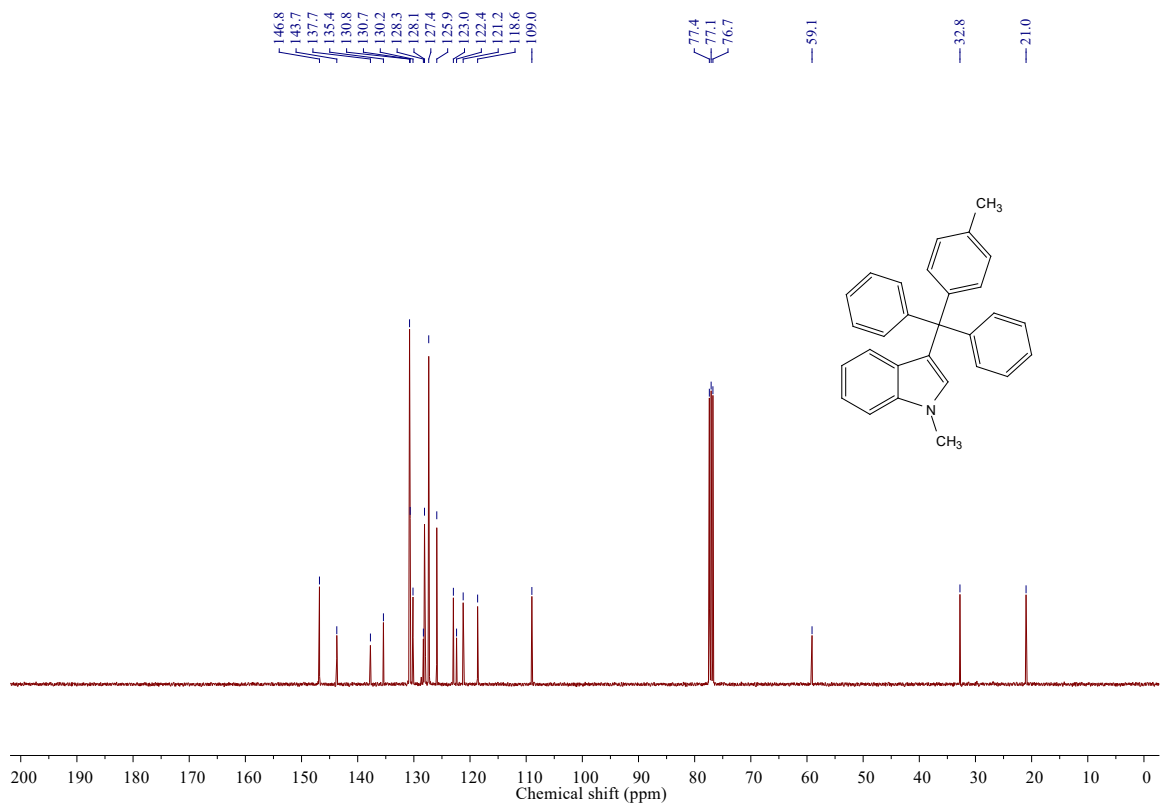



3ad.

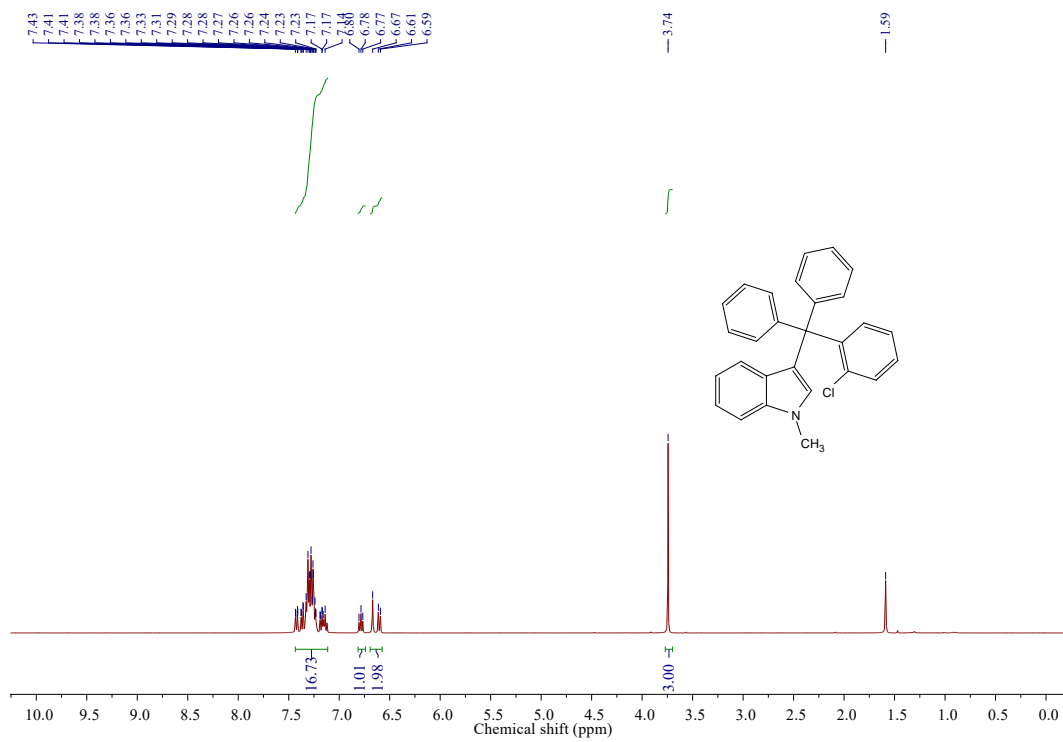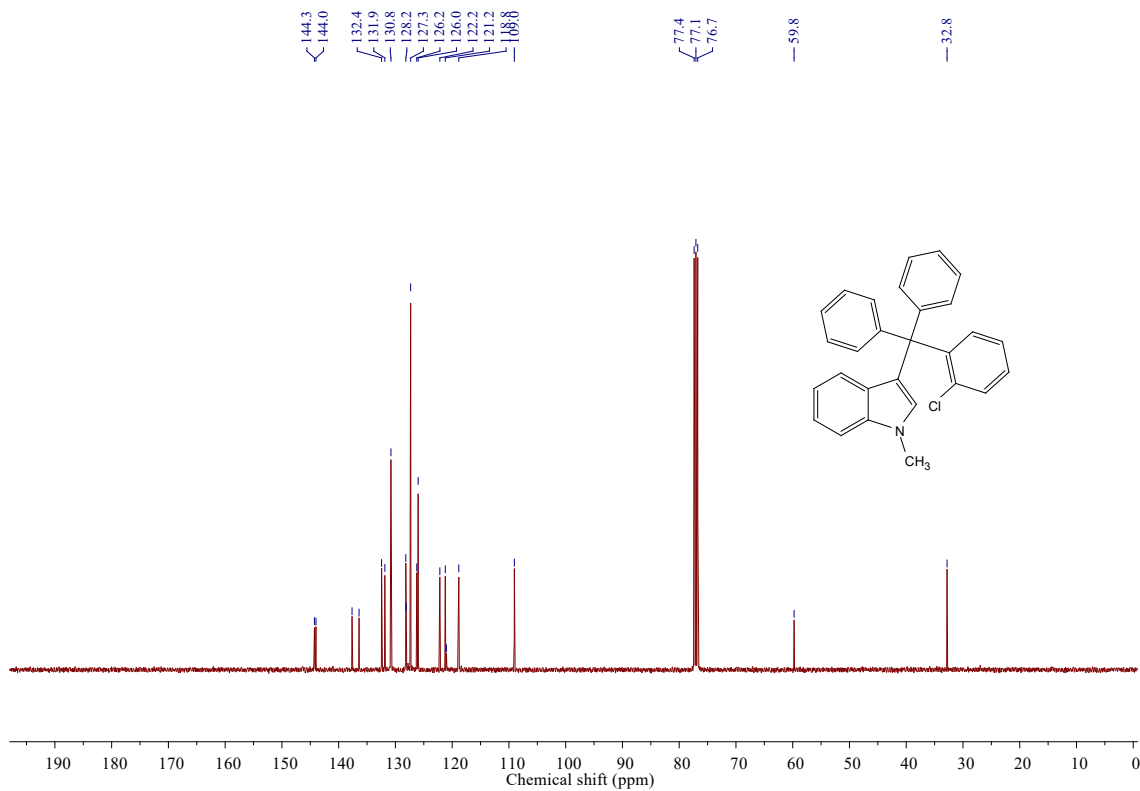

3ae.

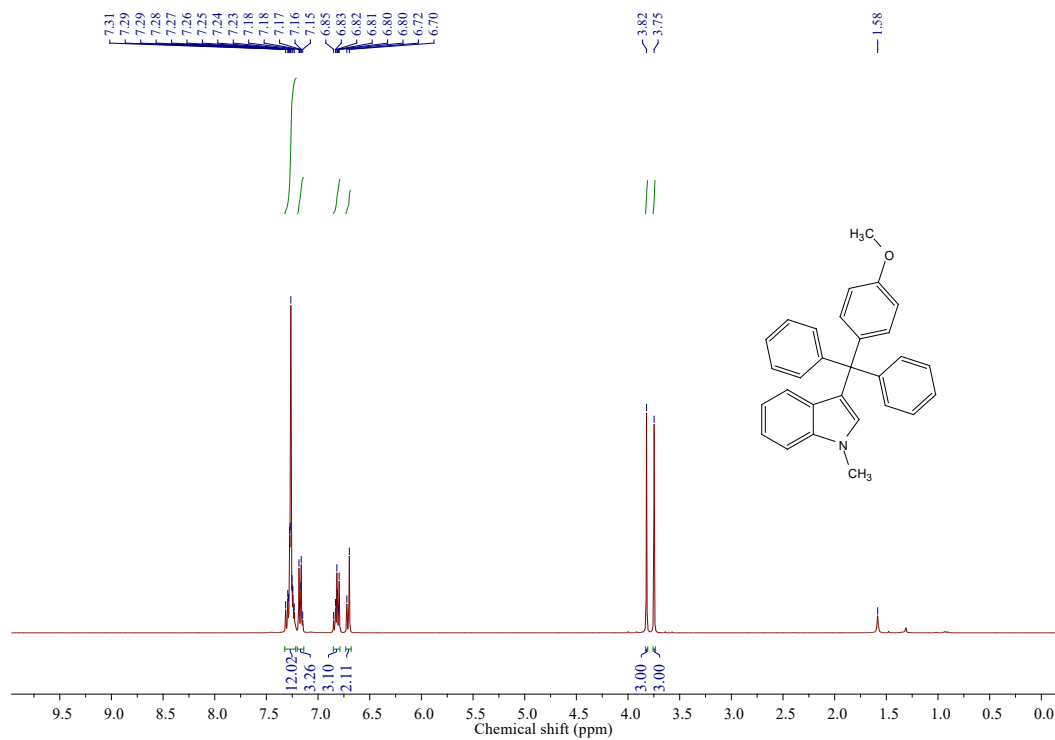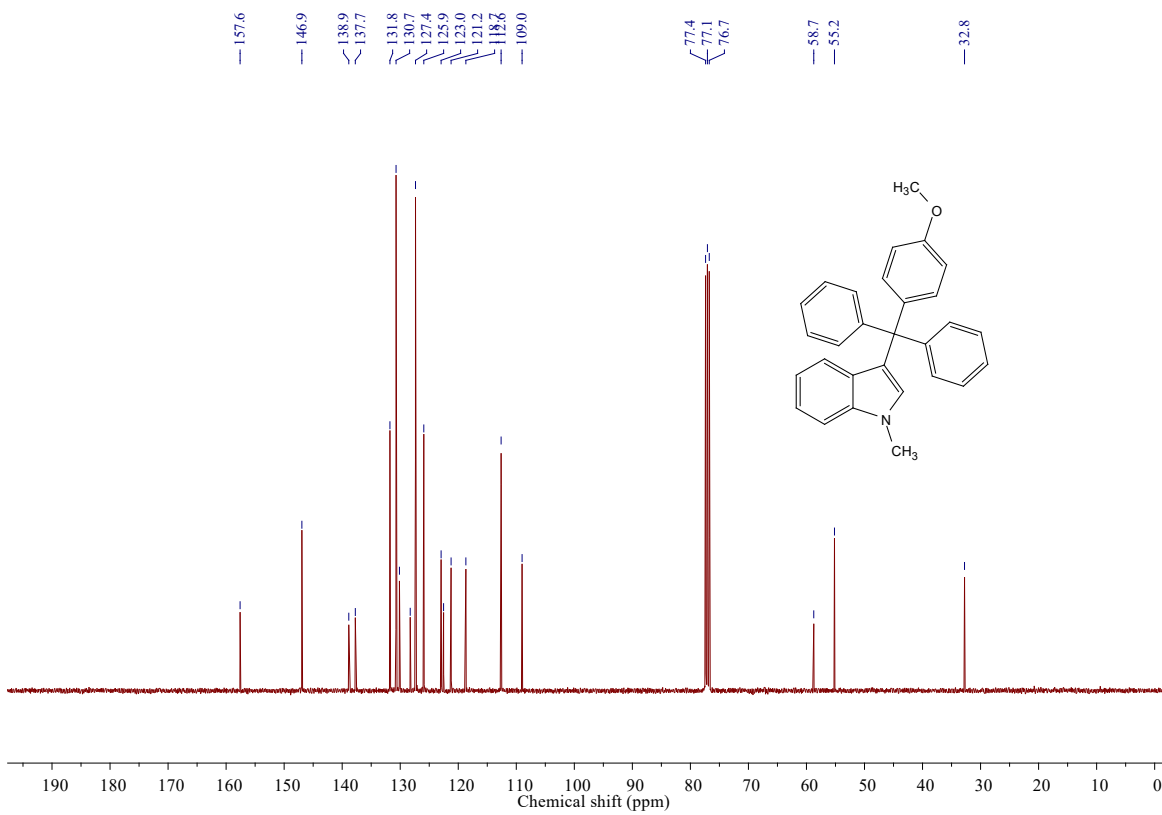

3ba.

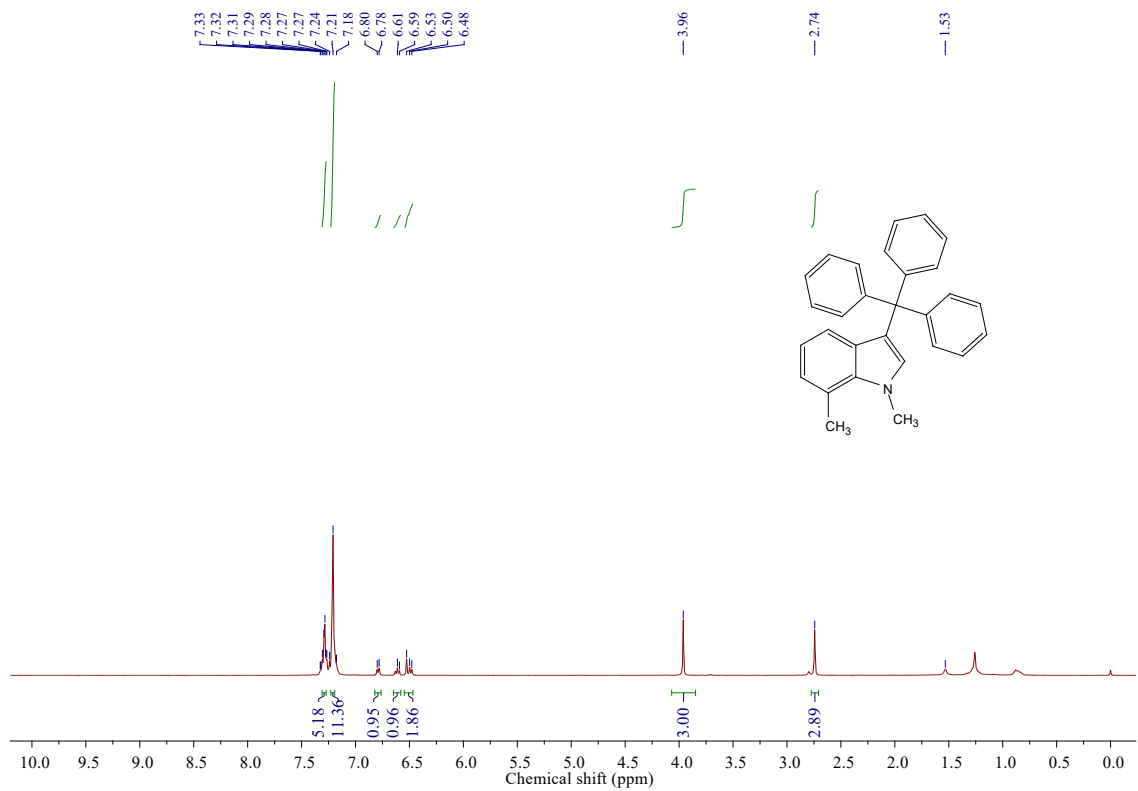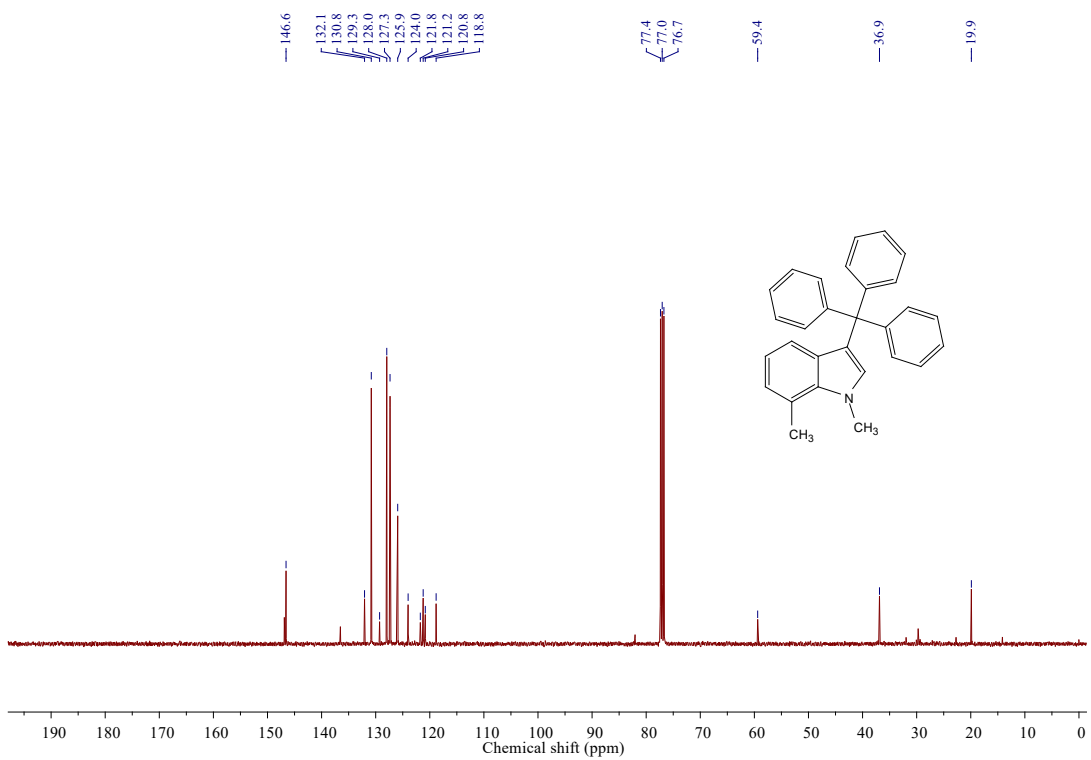

3bb.

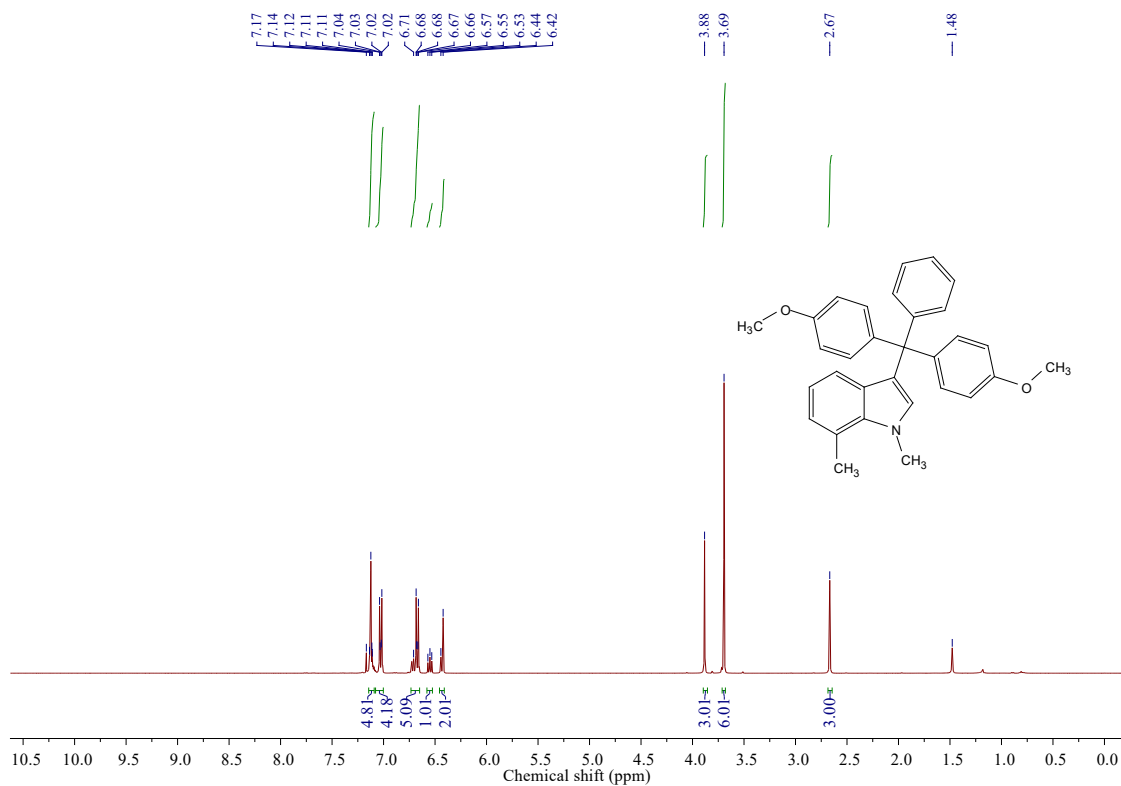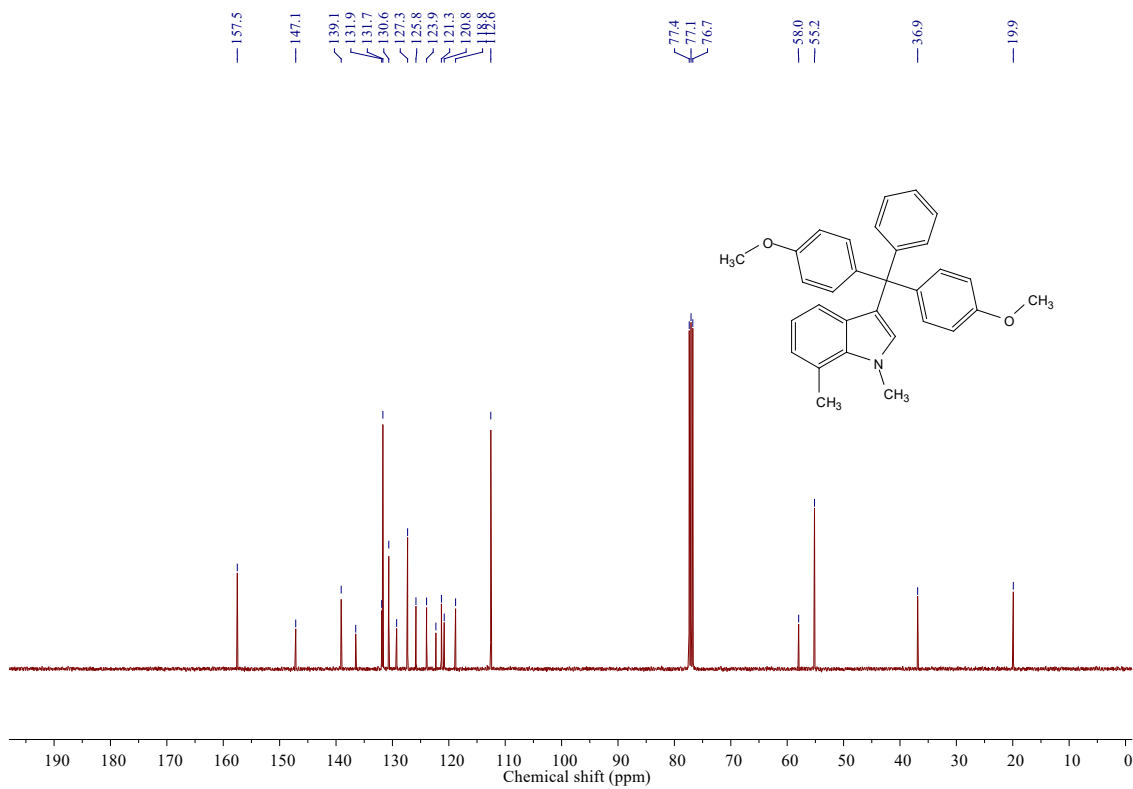

3bc.

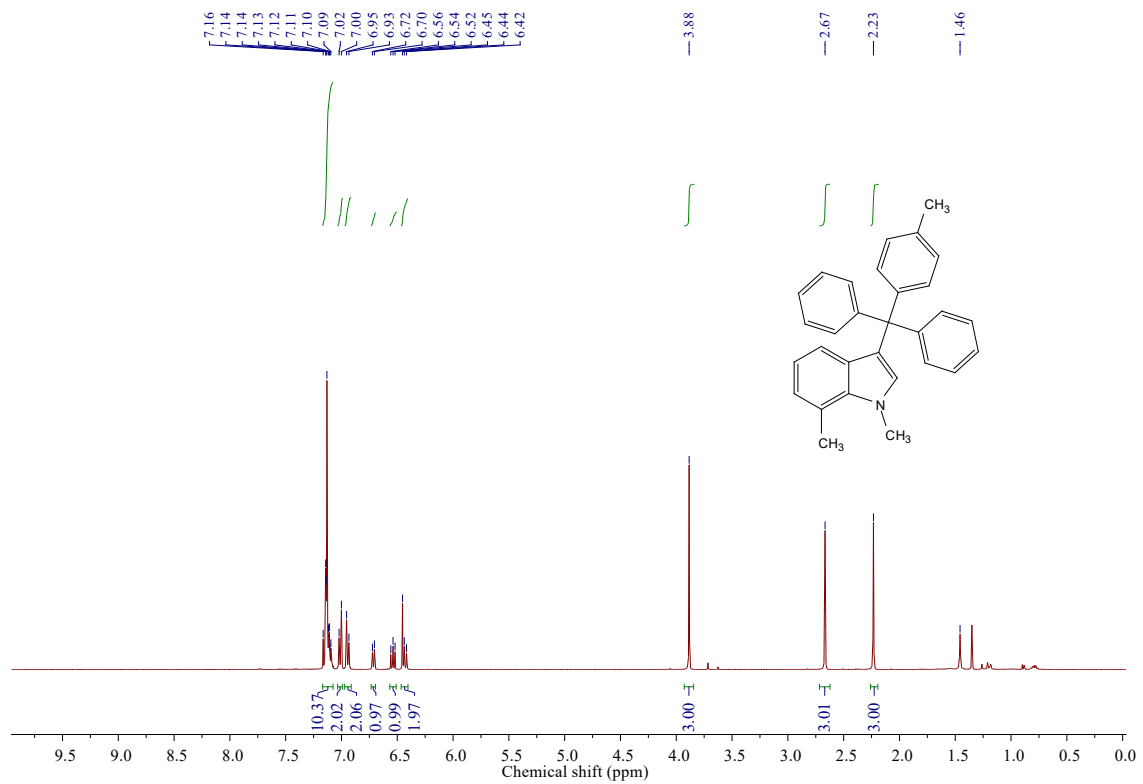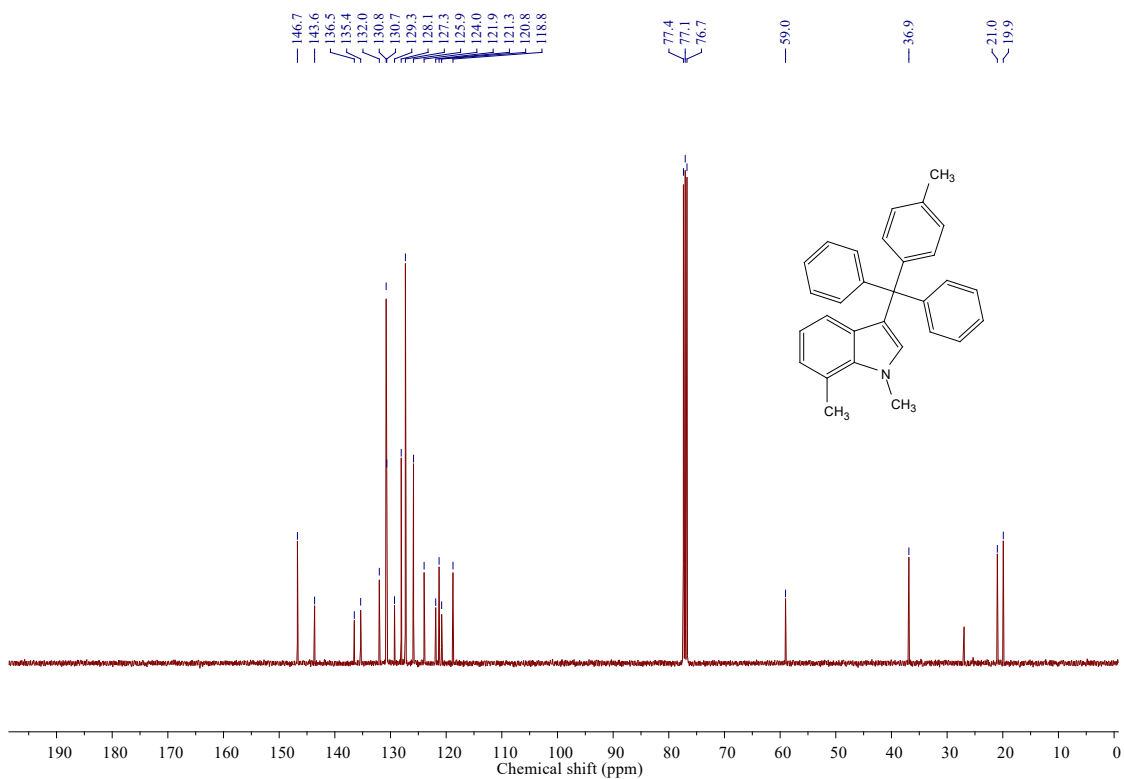

3bd.

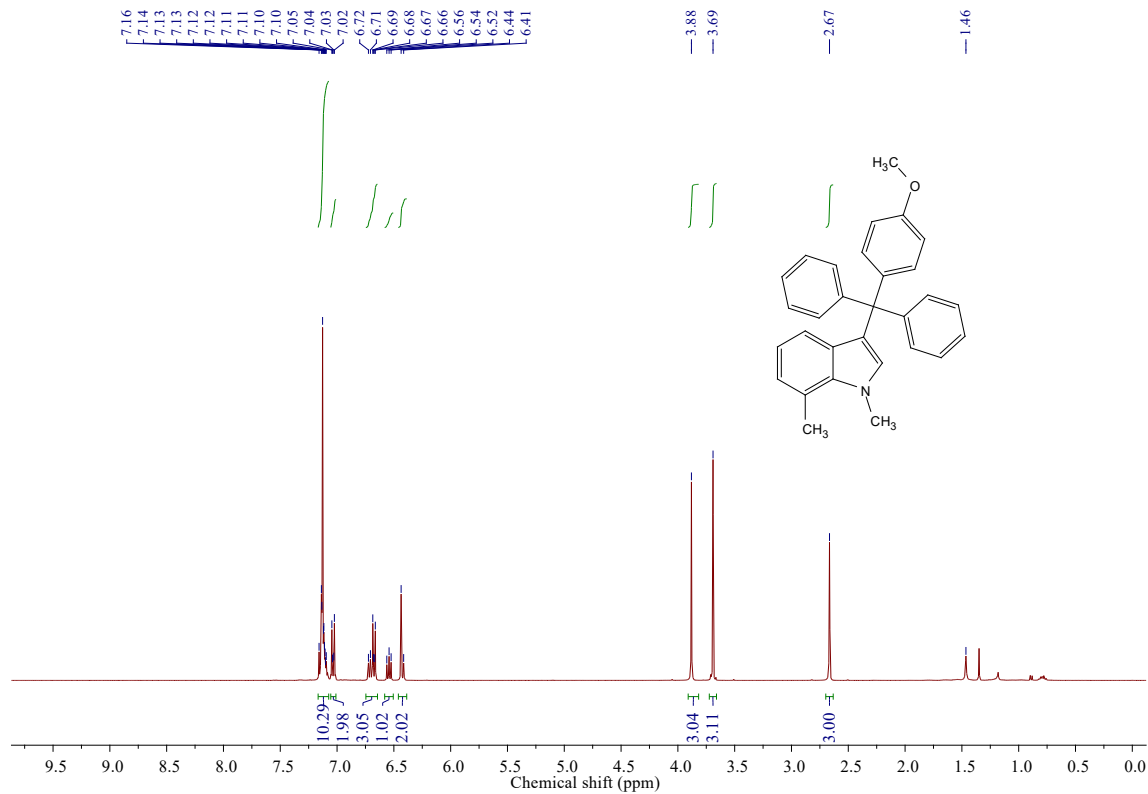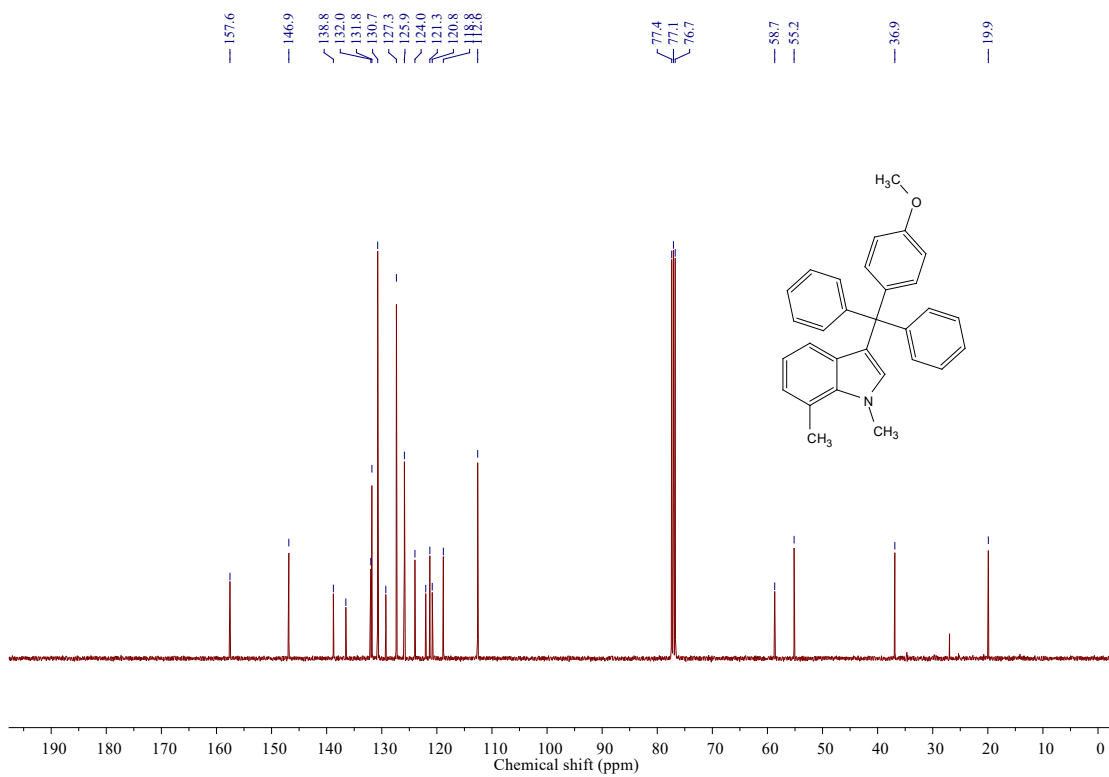

3ca.

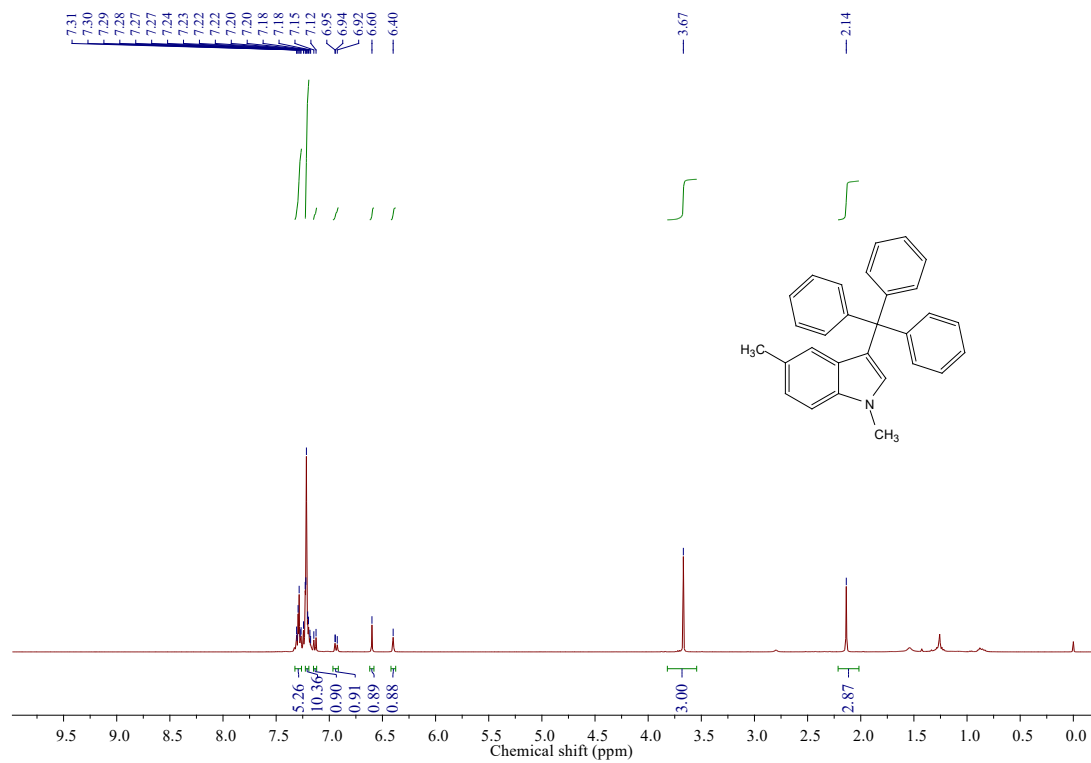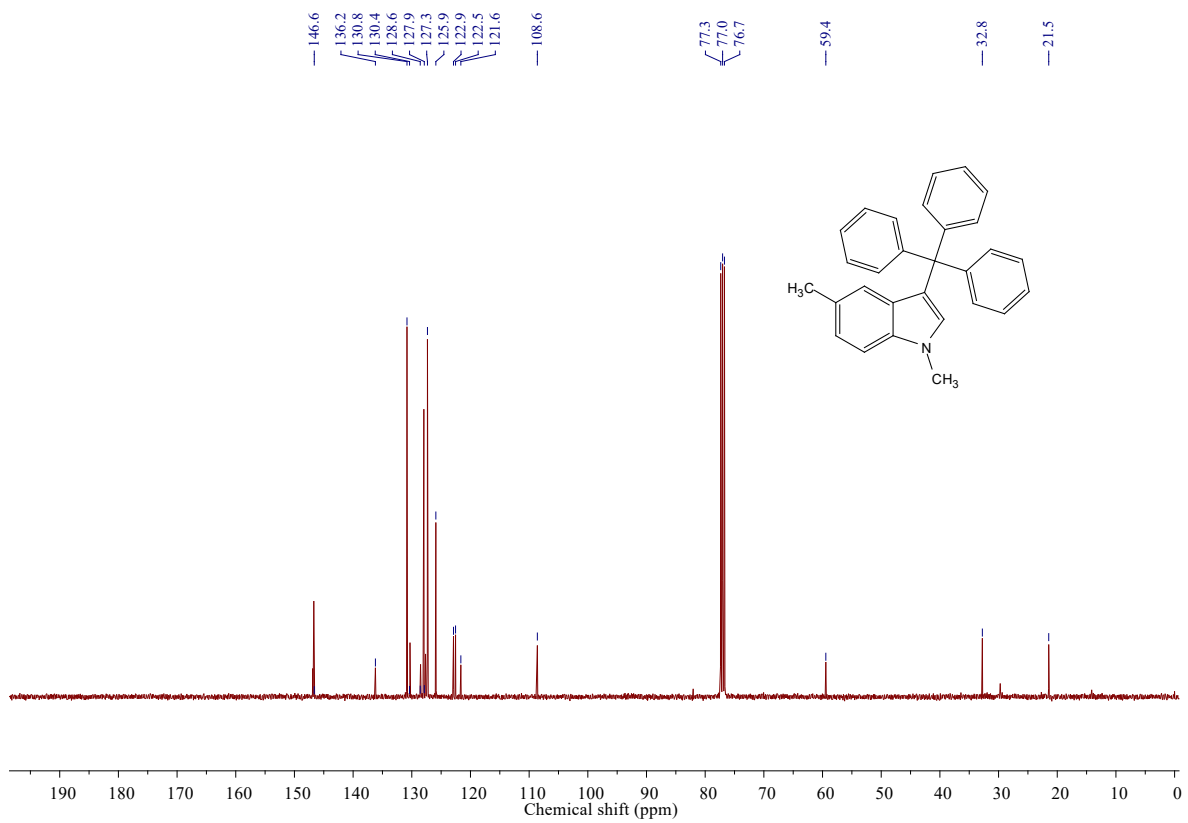

3cb.

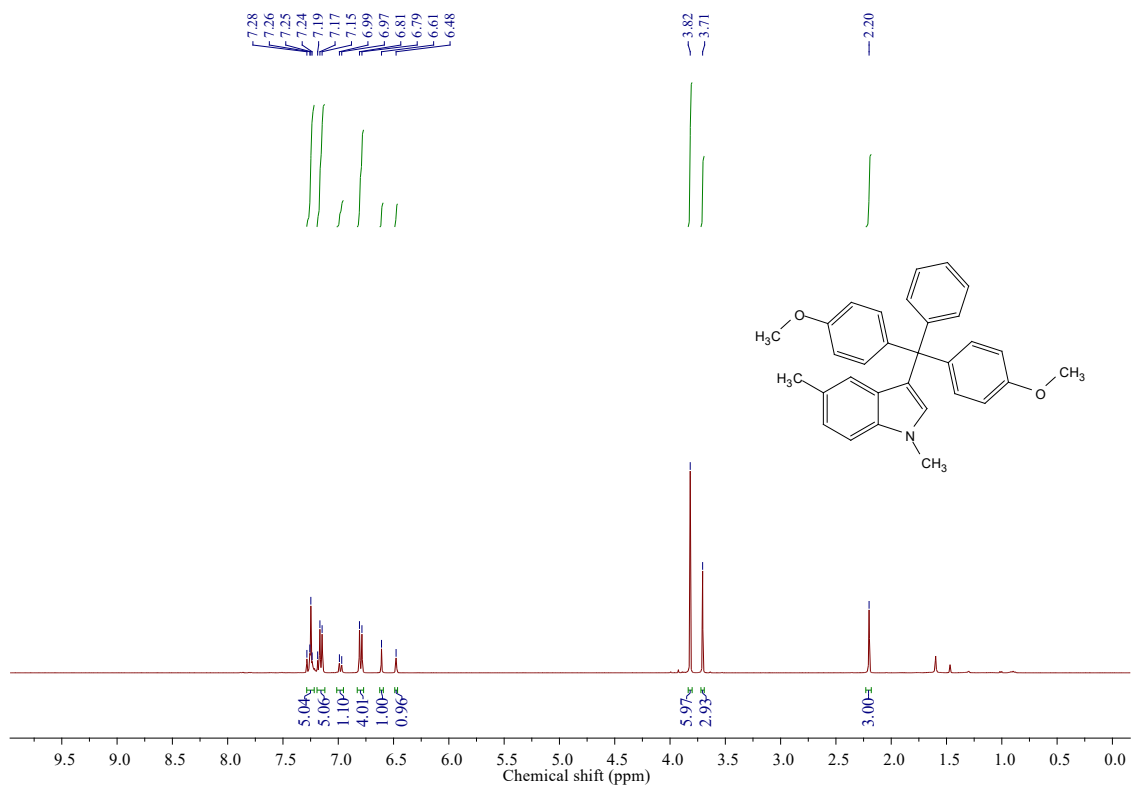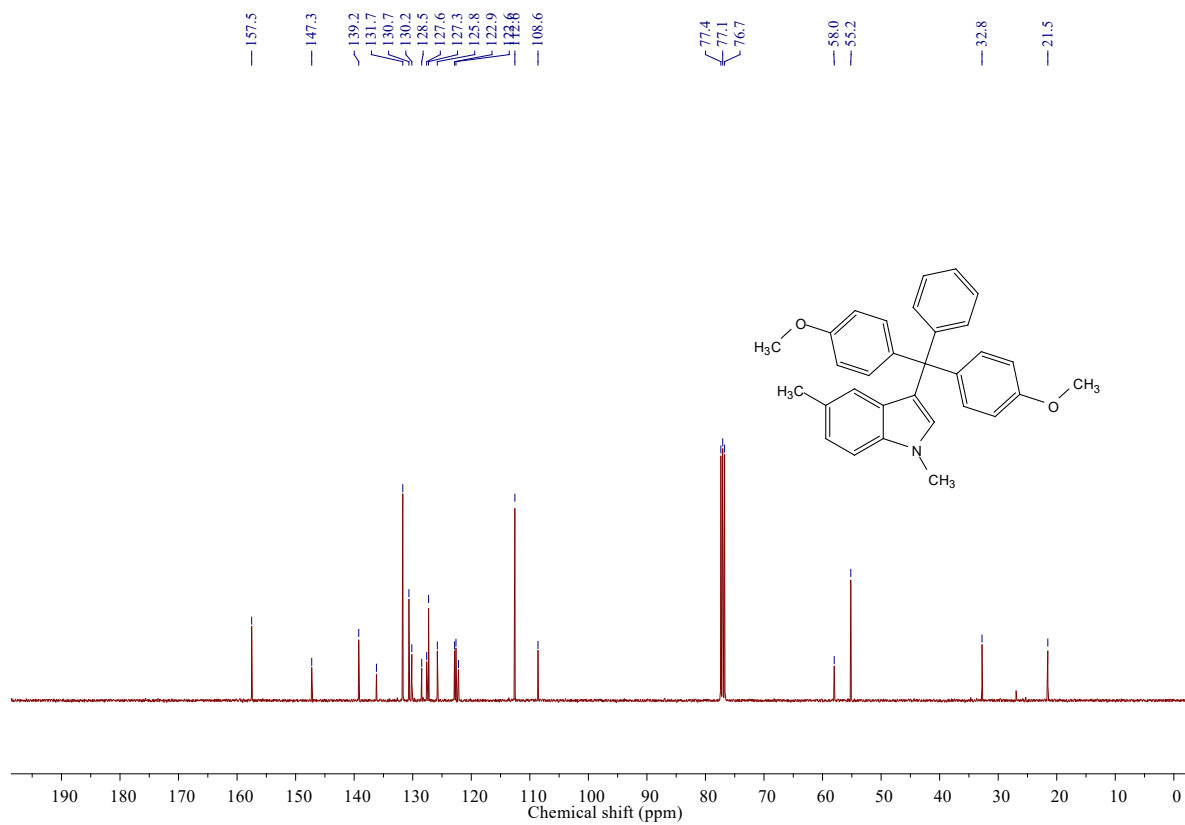



3cc.

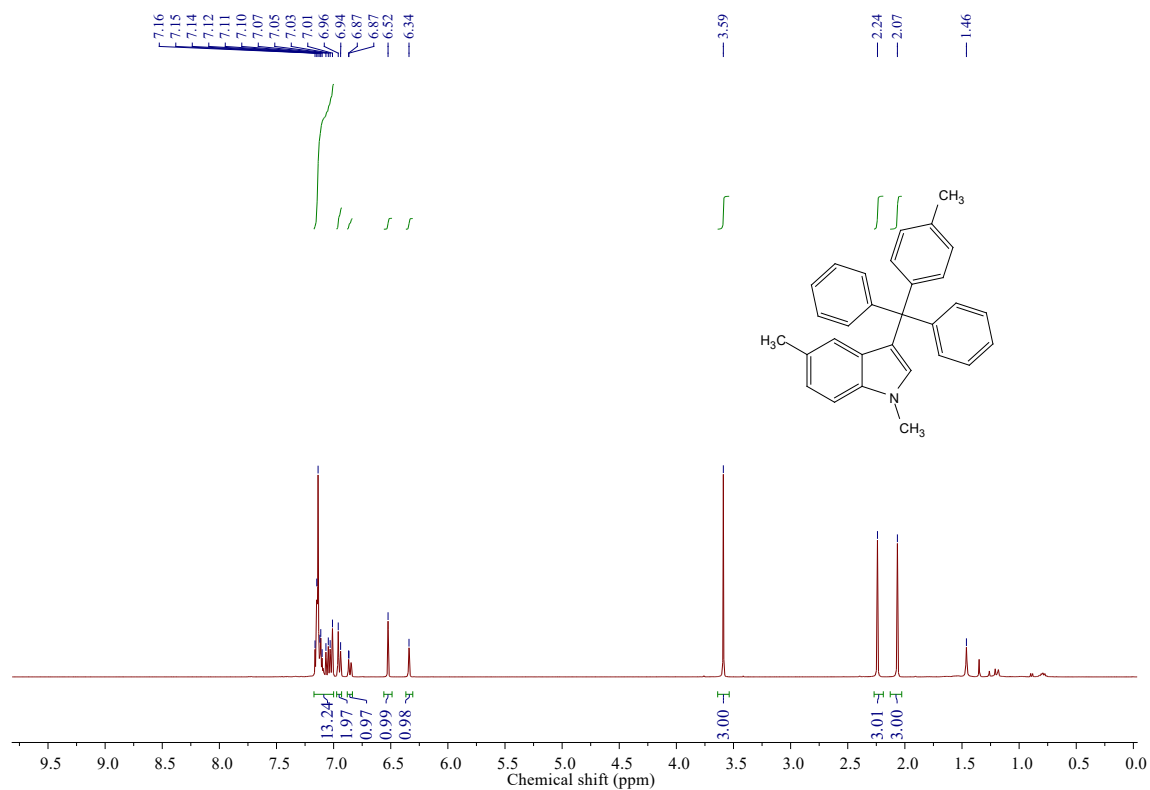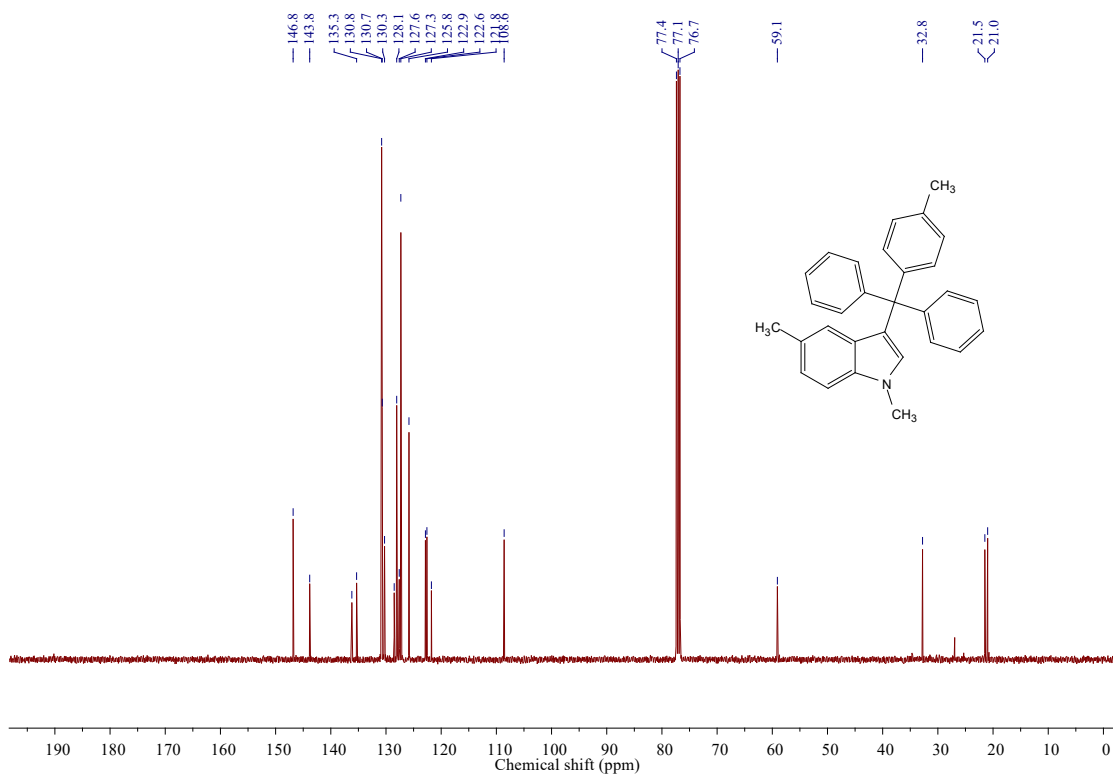

3cd.

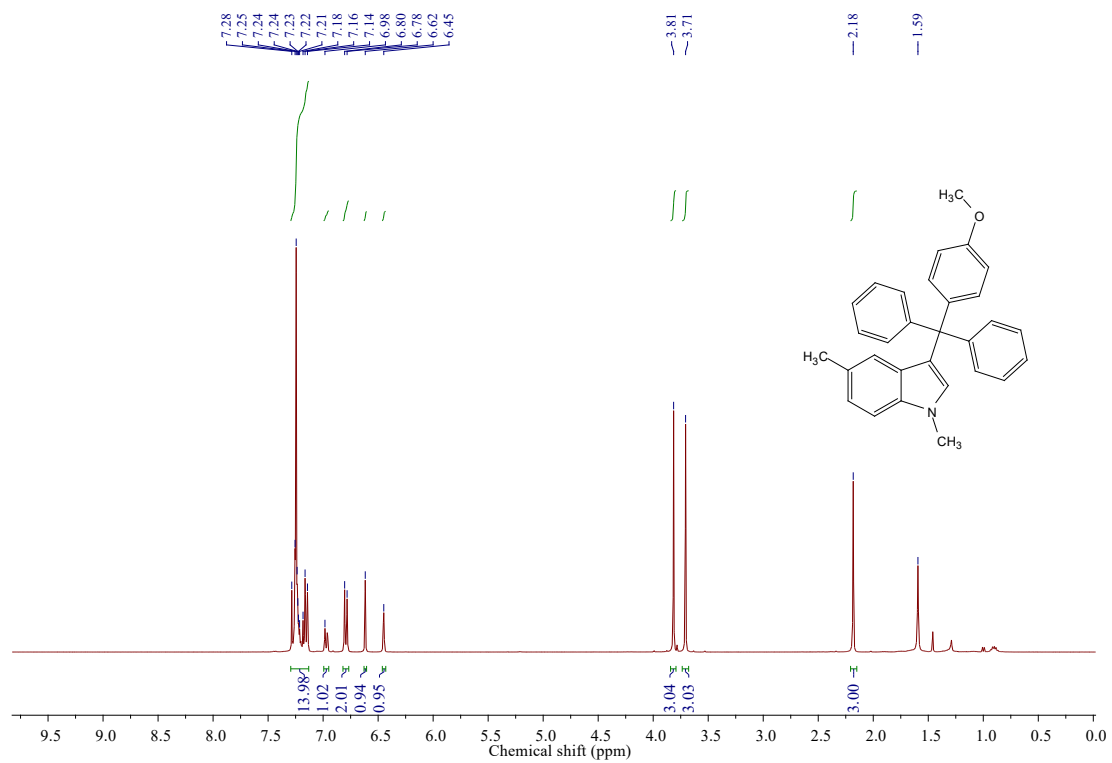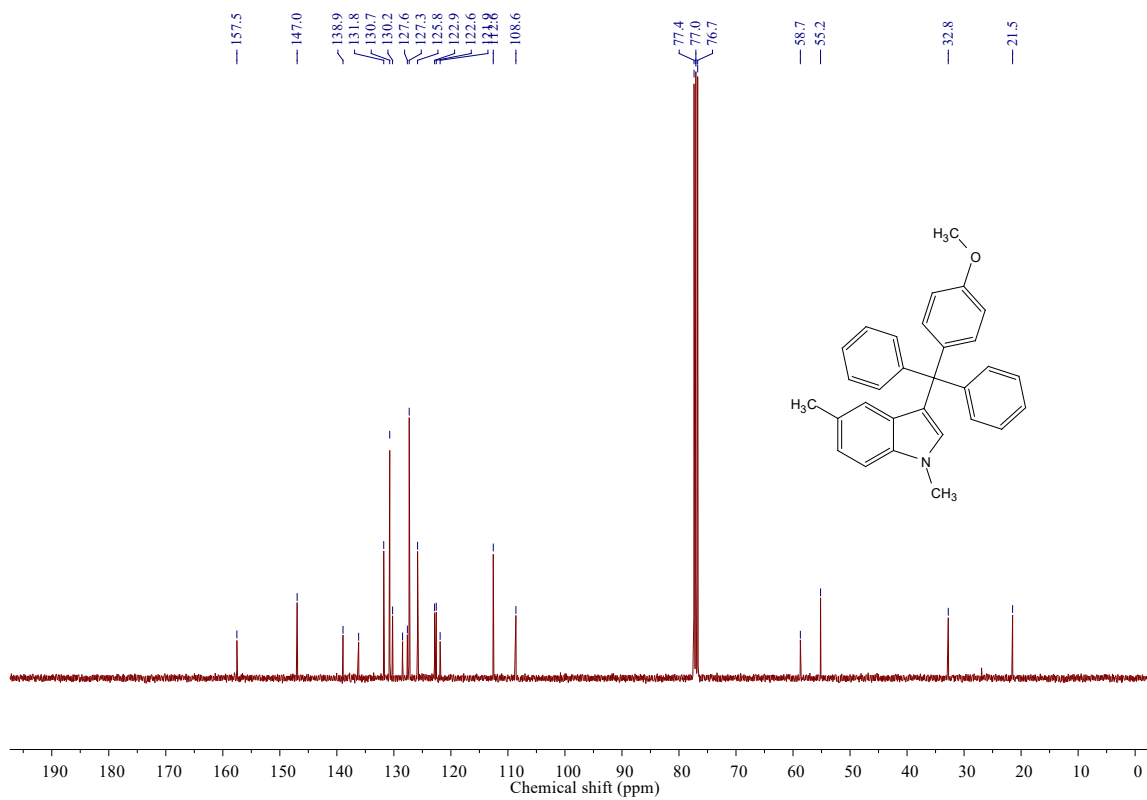

3da.

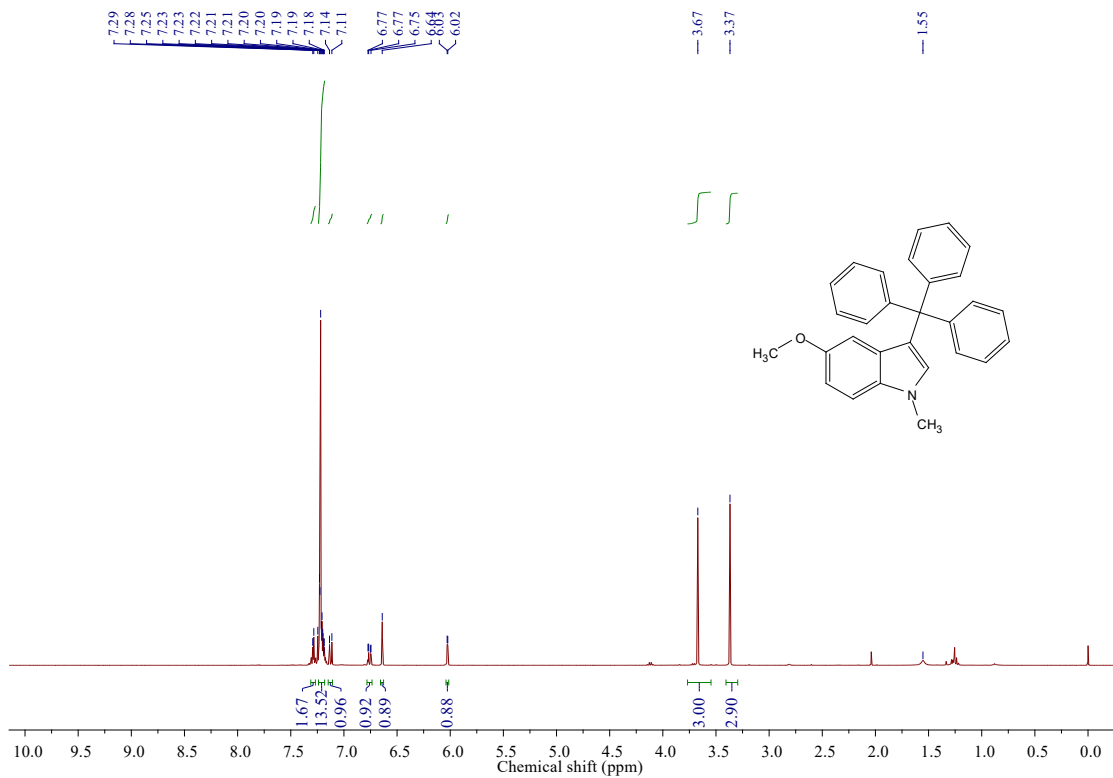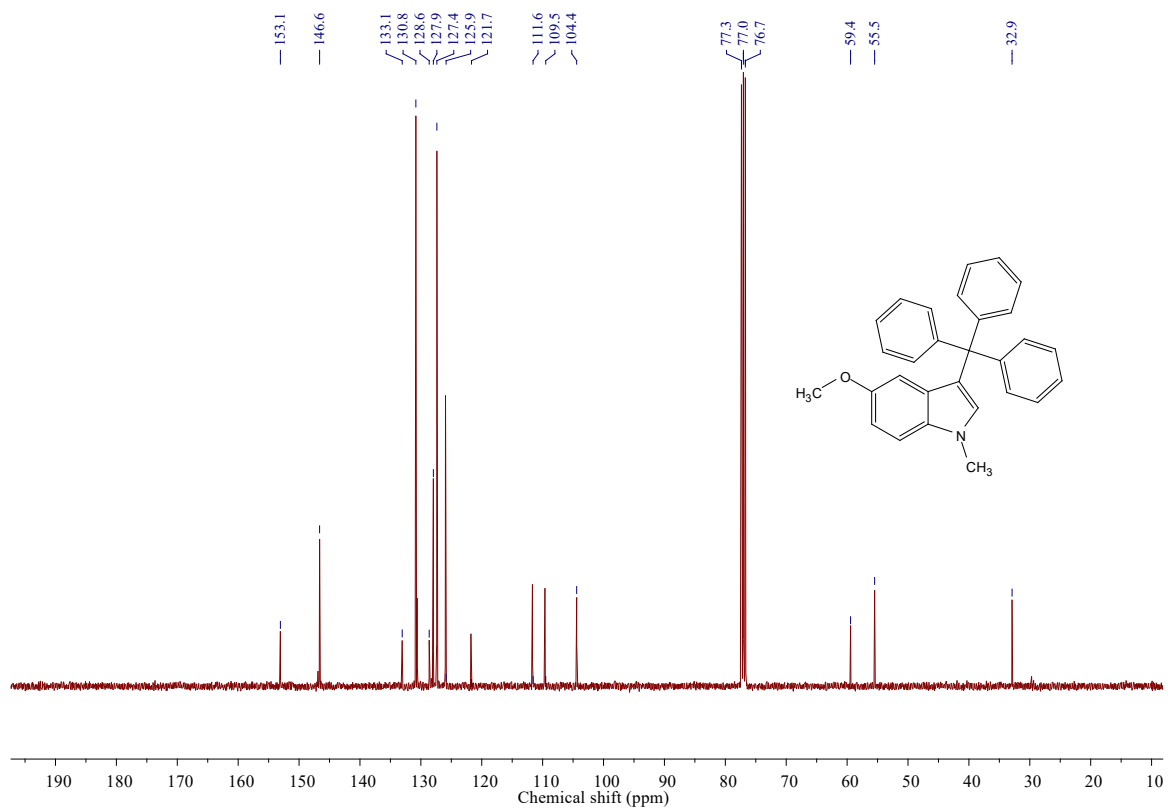

3db.

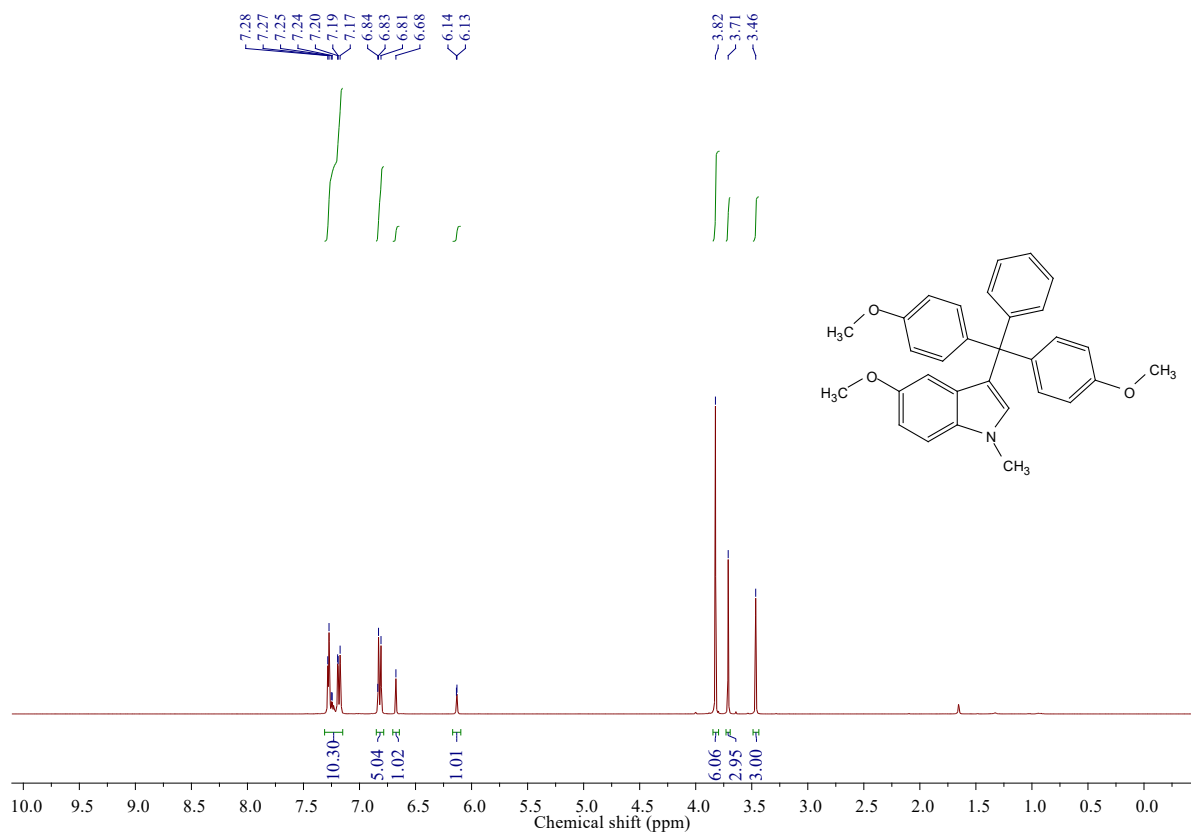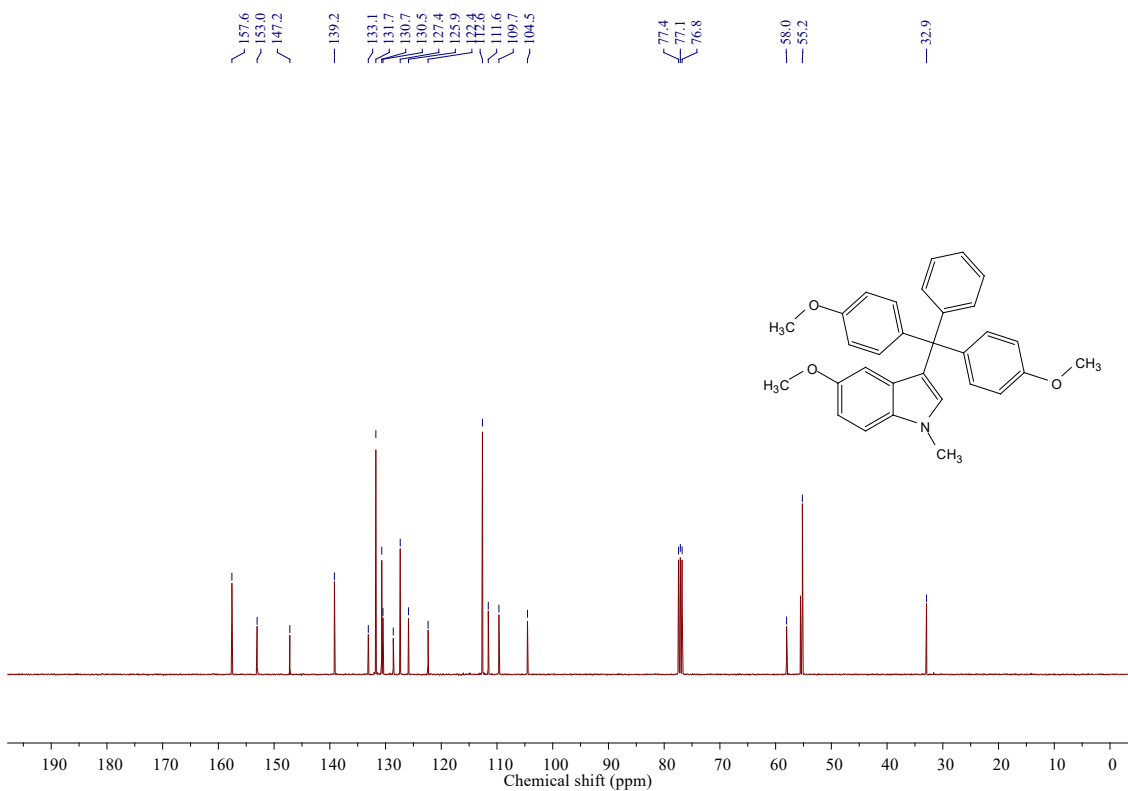

3ea.

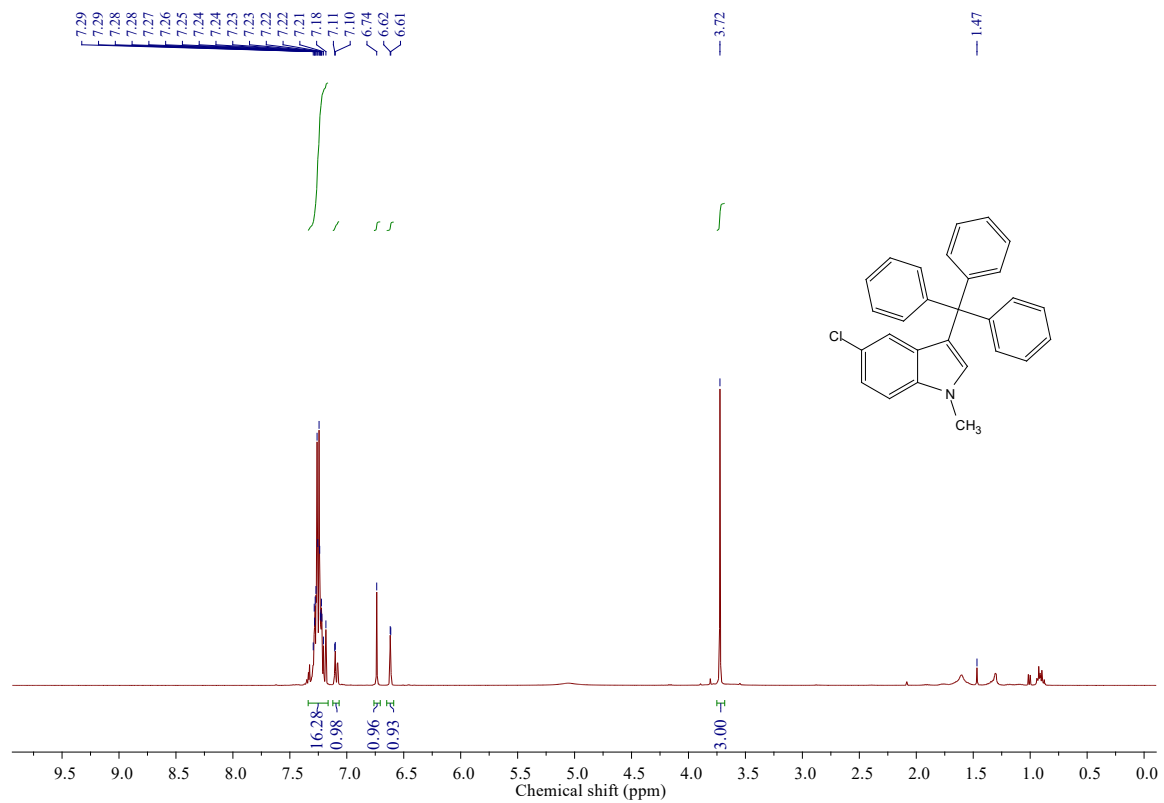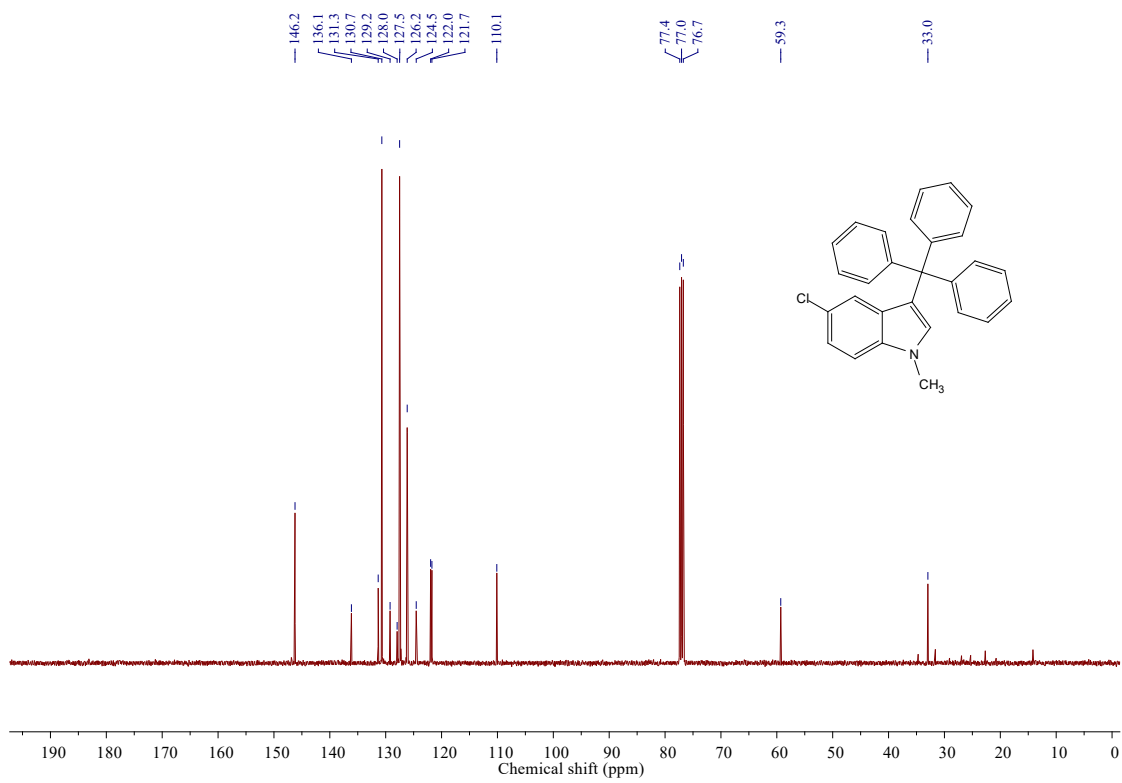

3eb.

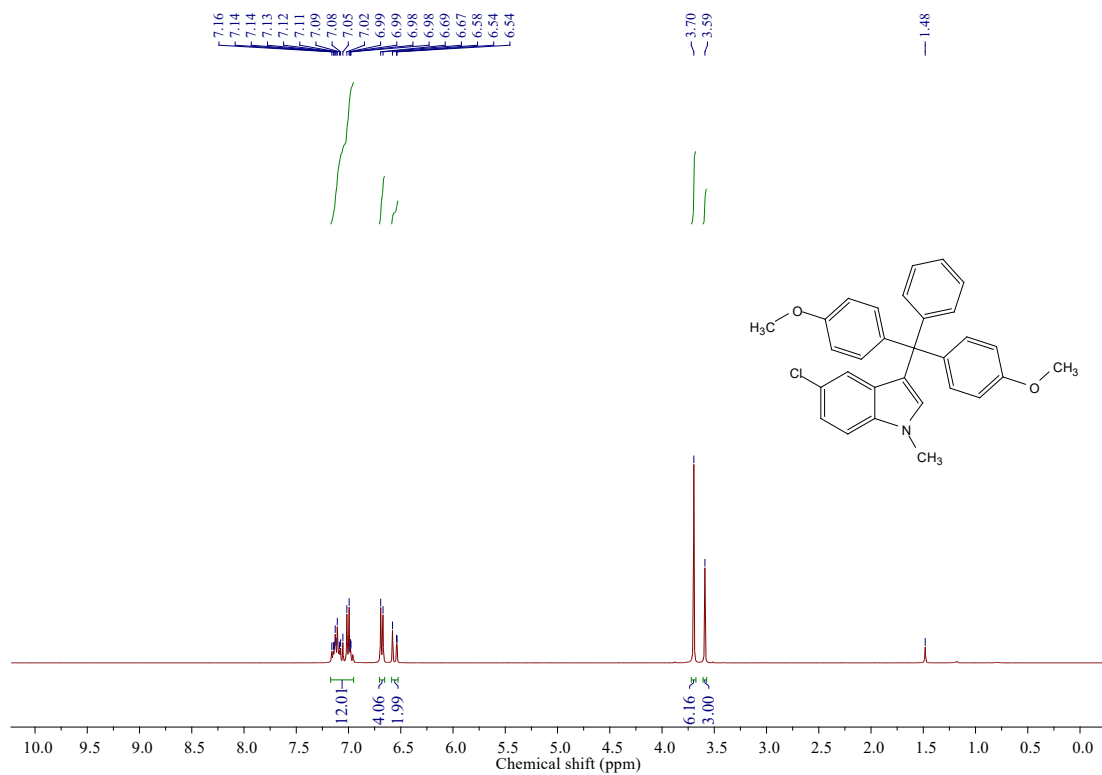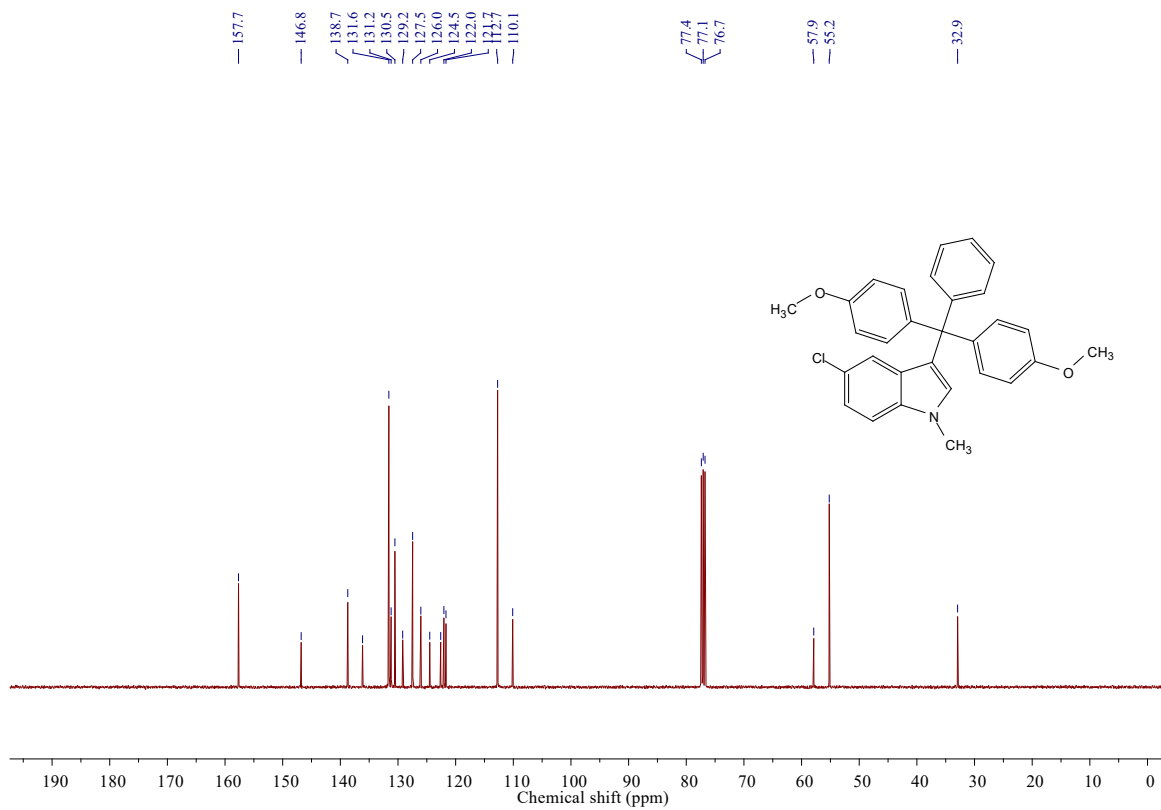

3ec.

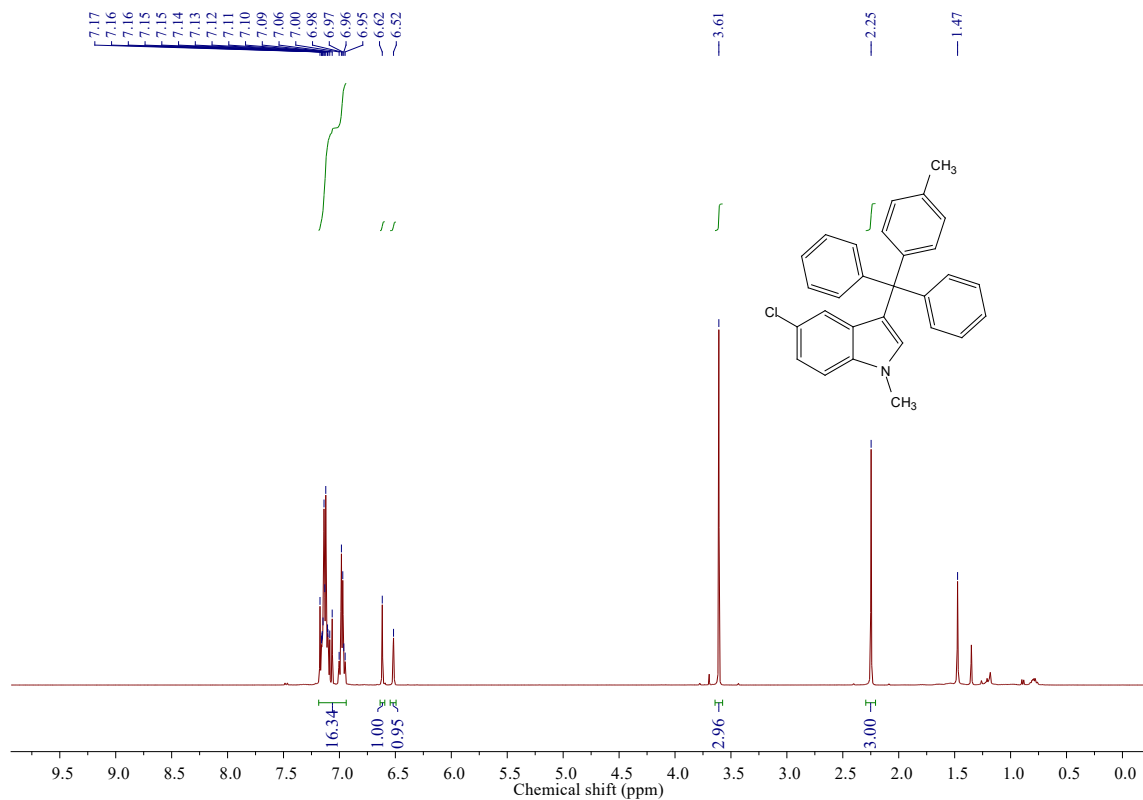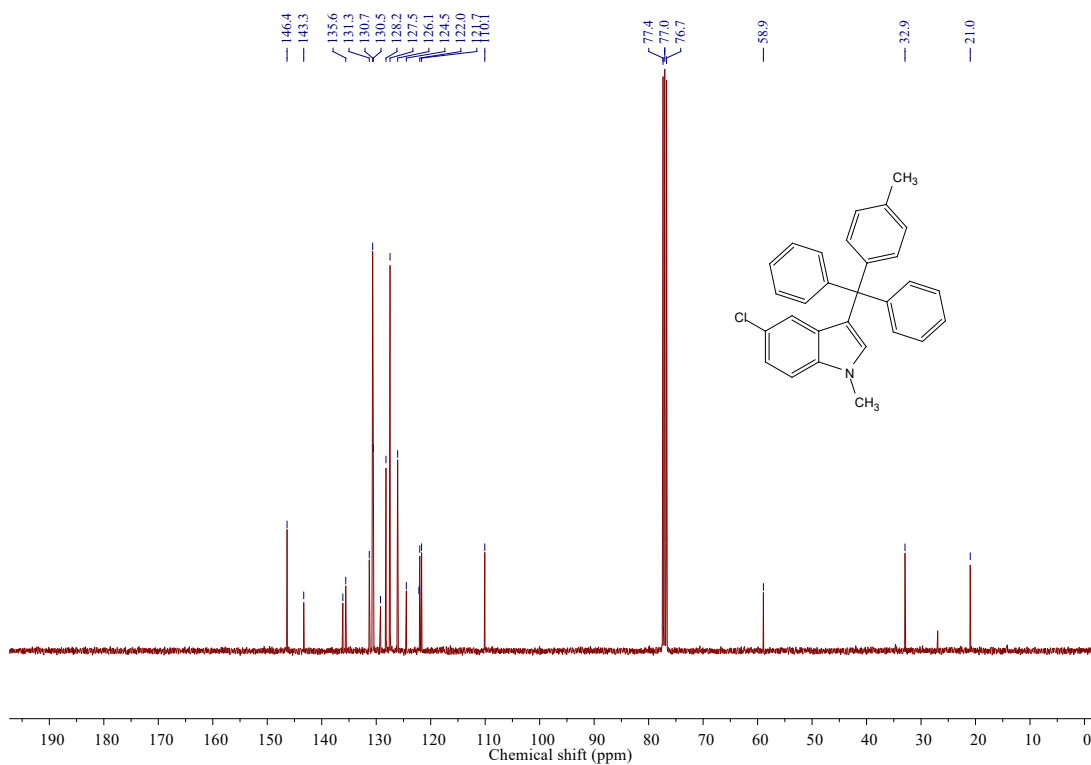

3fa.

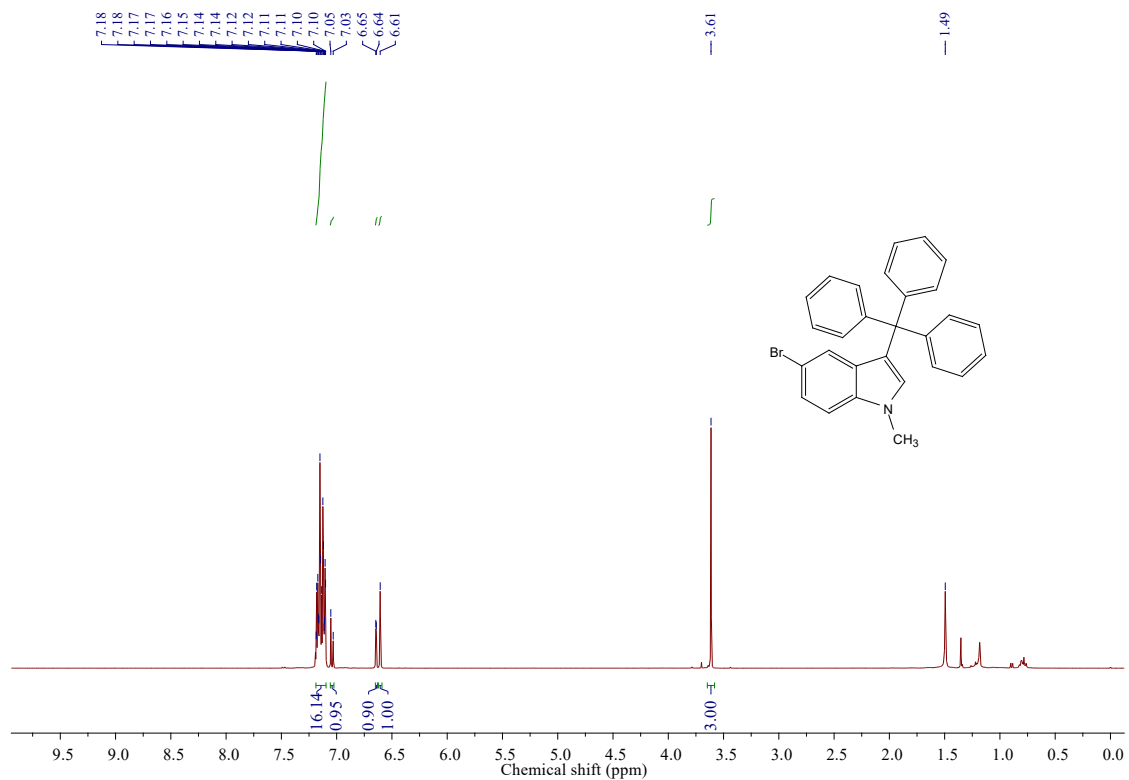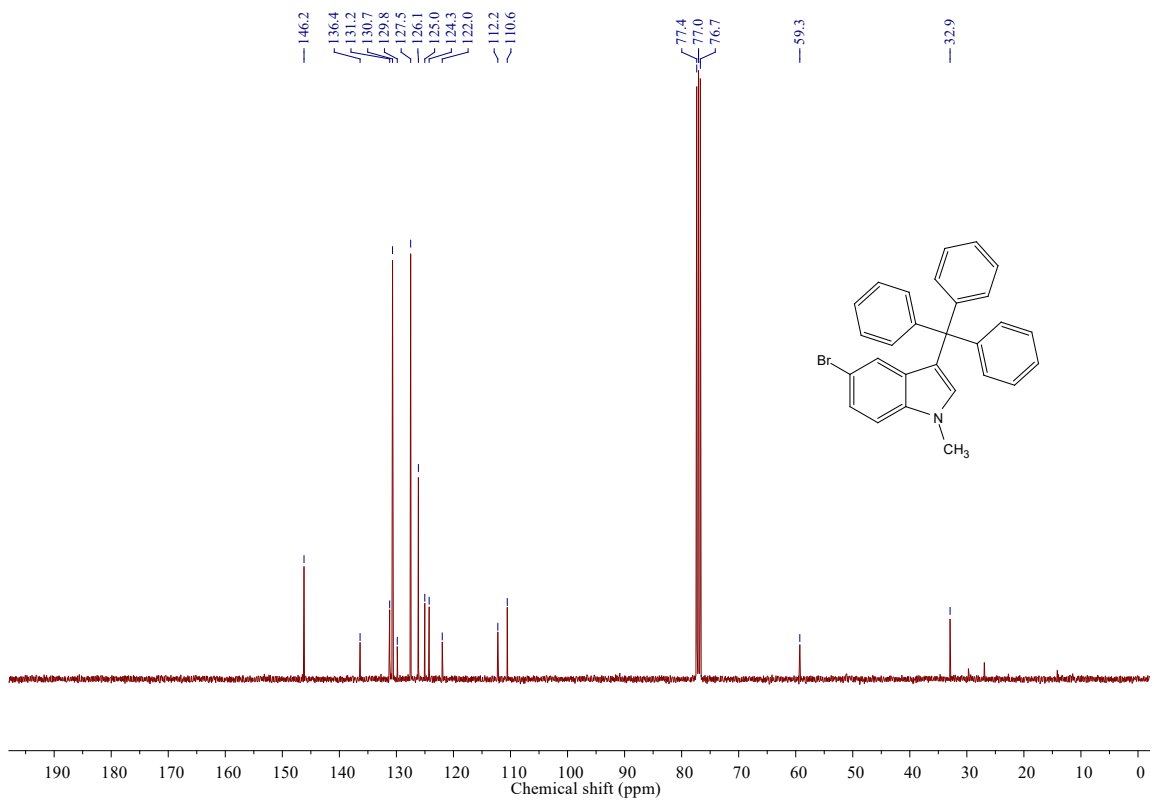



3fb.

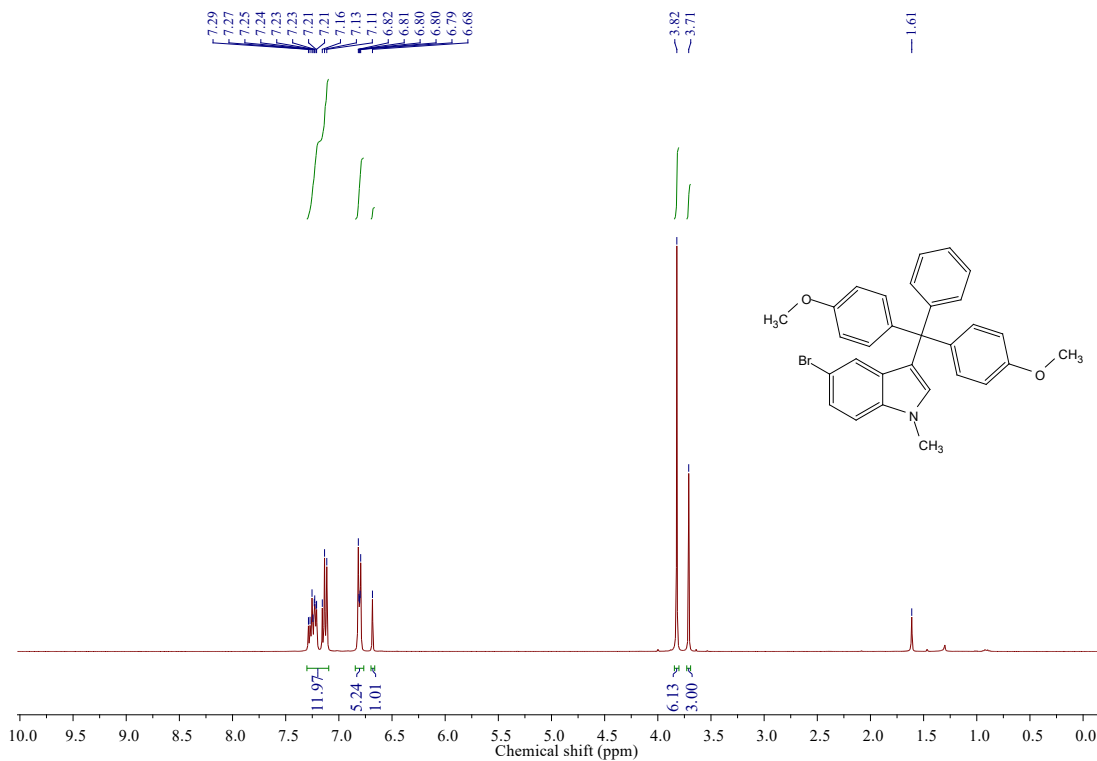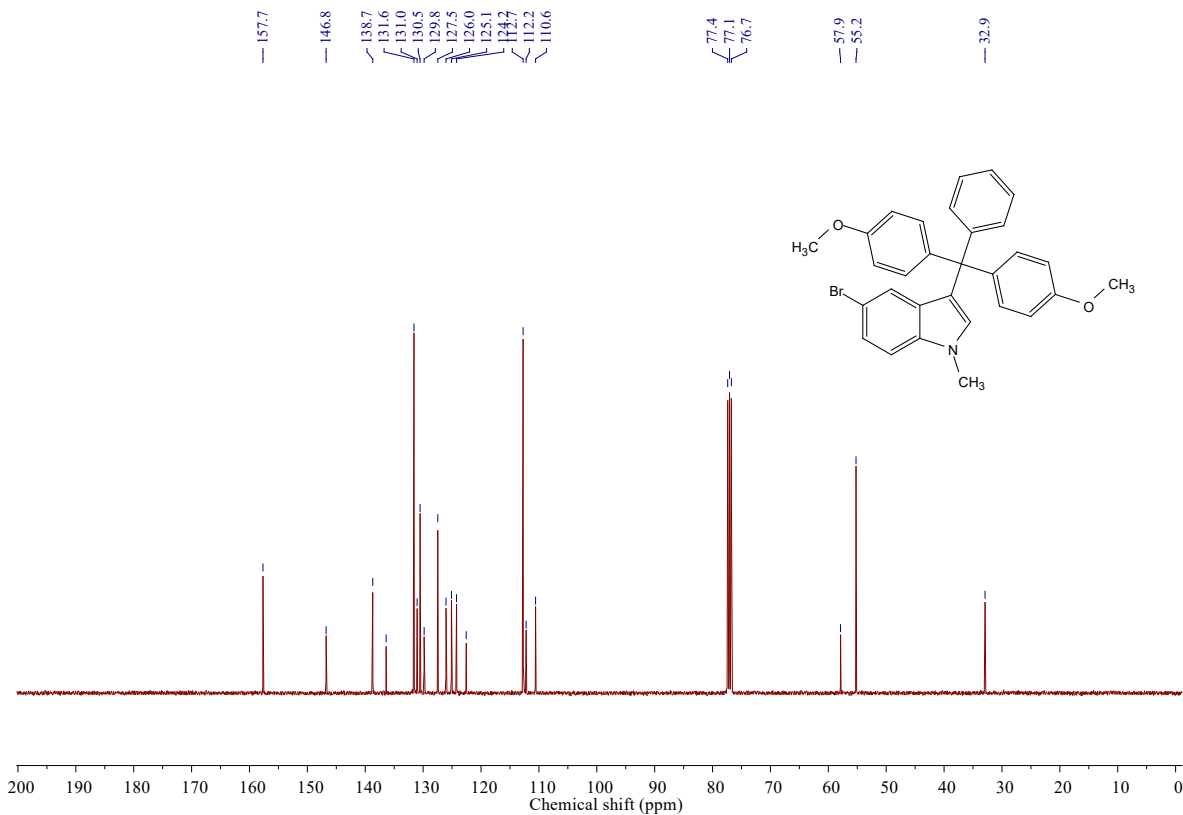

3ga.

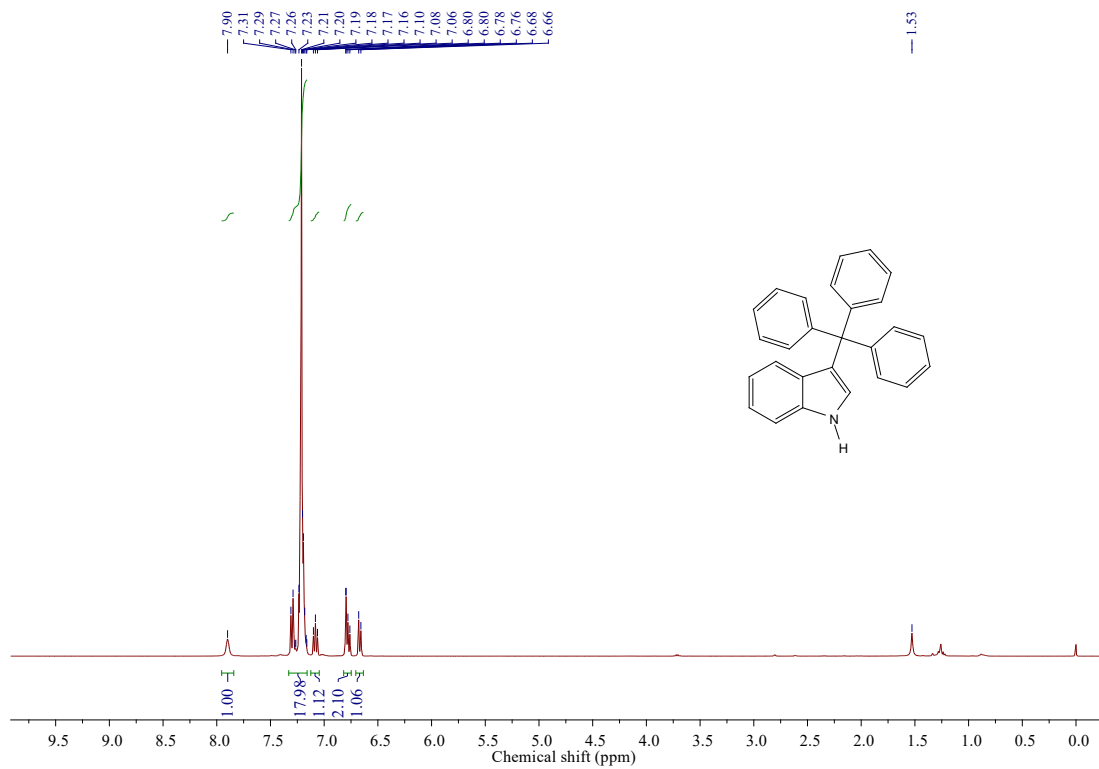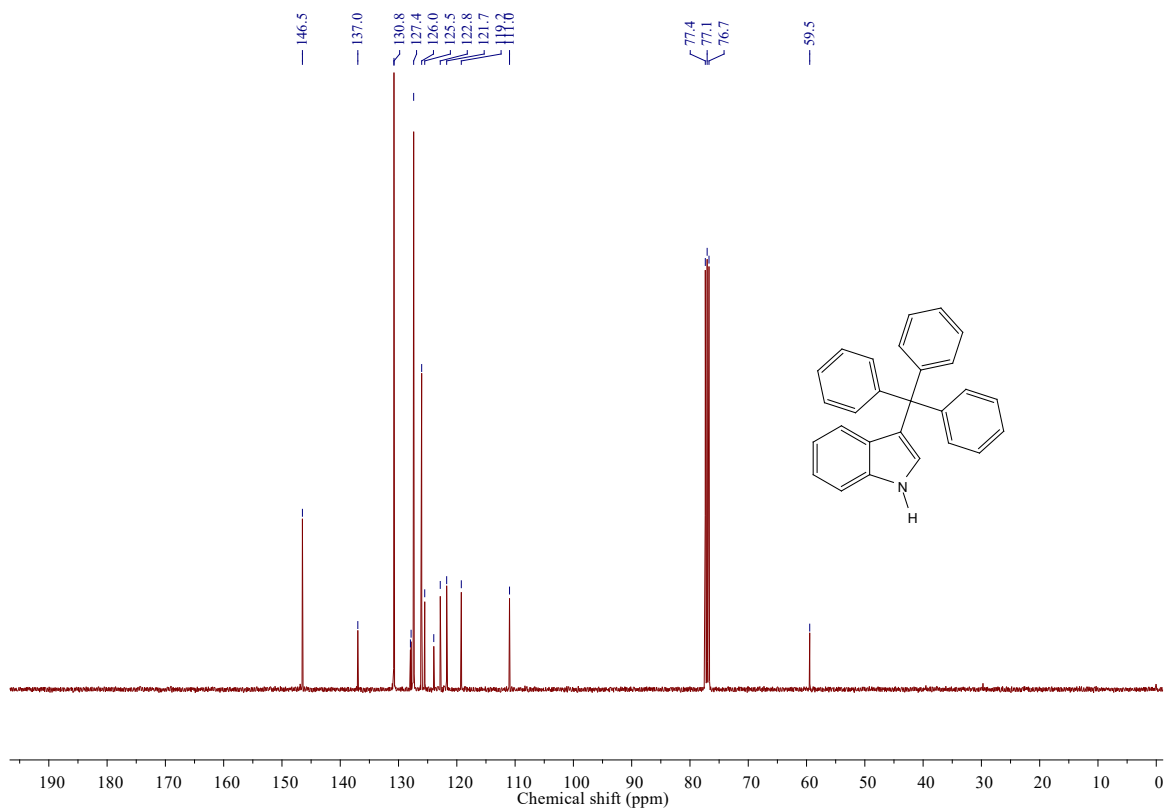

3gb.

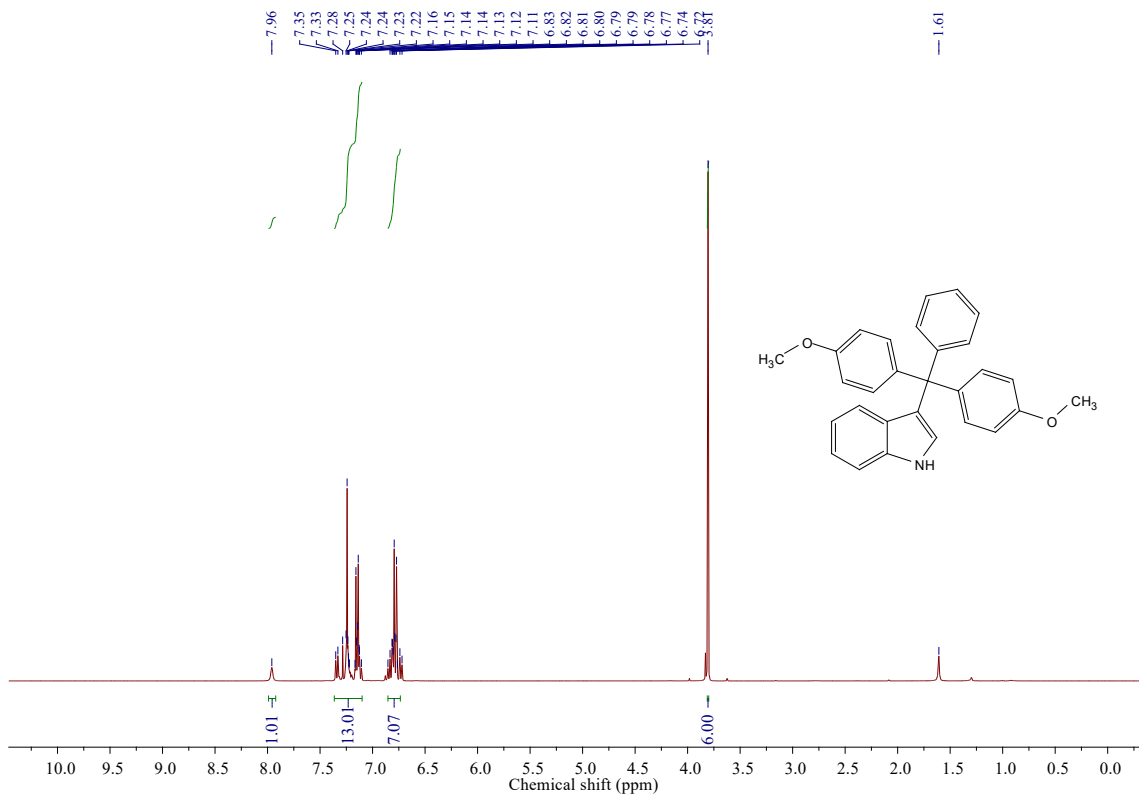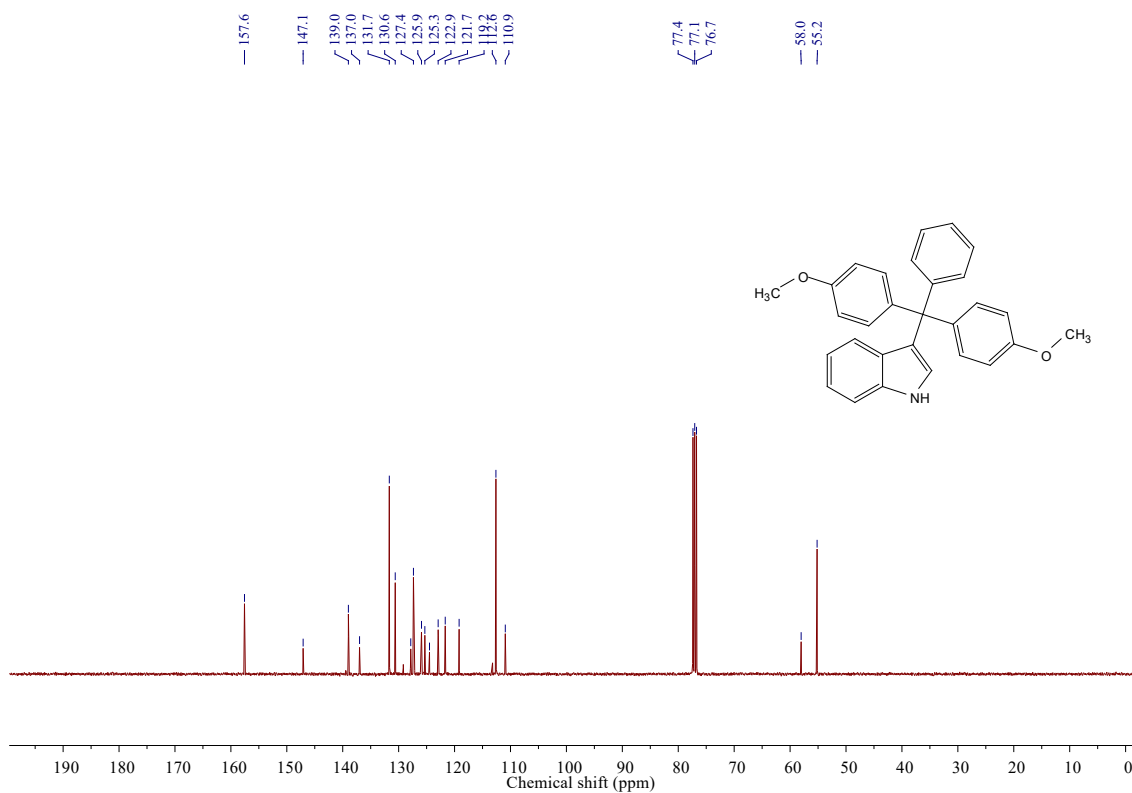

3gc.

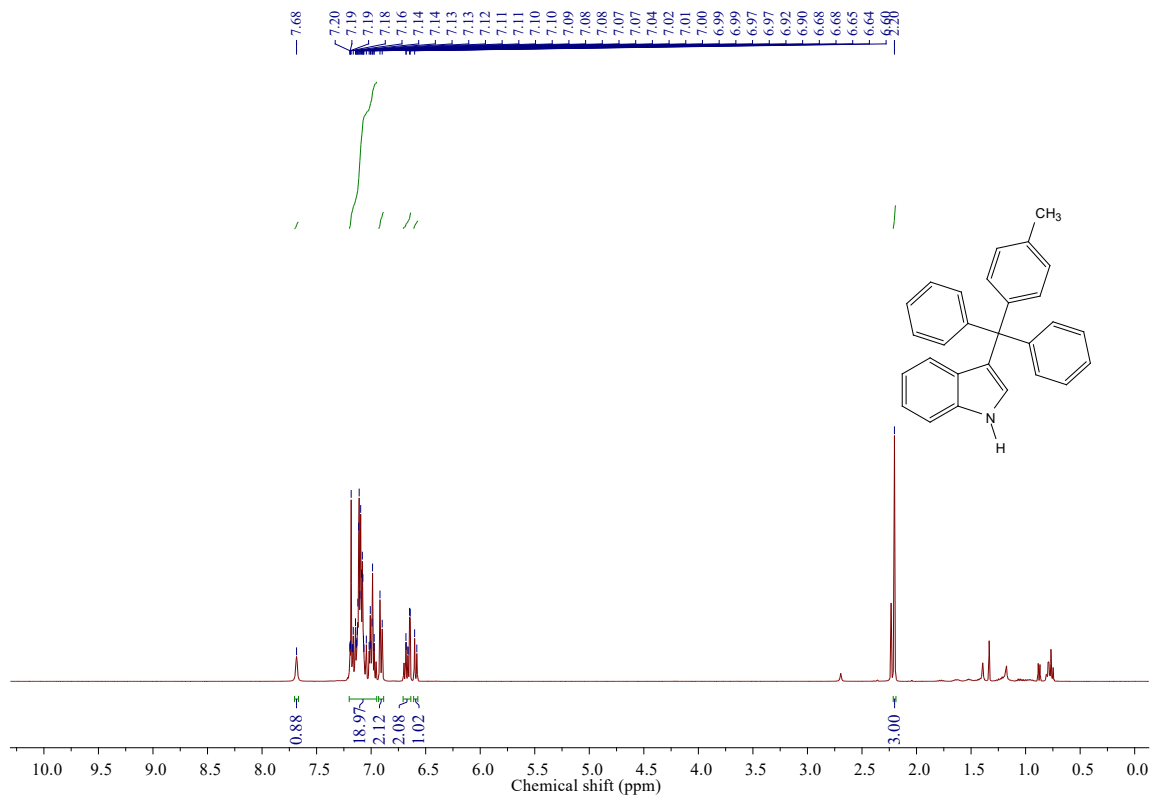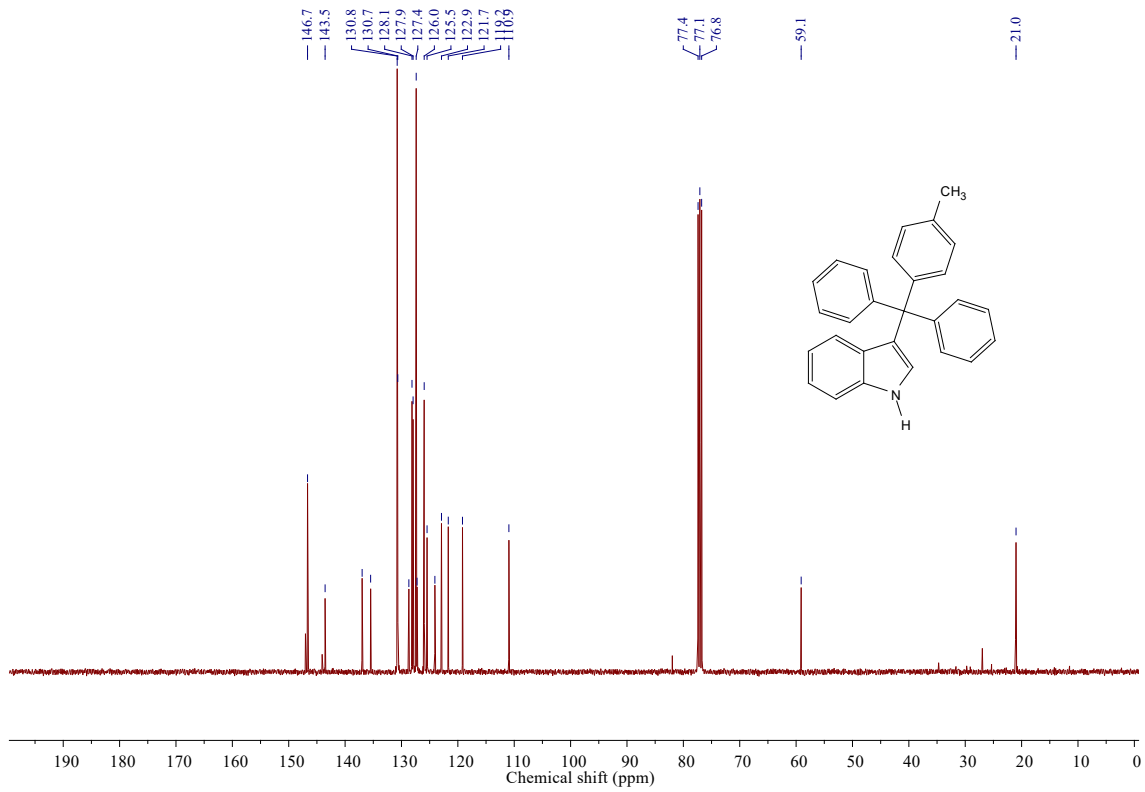

3gd.

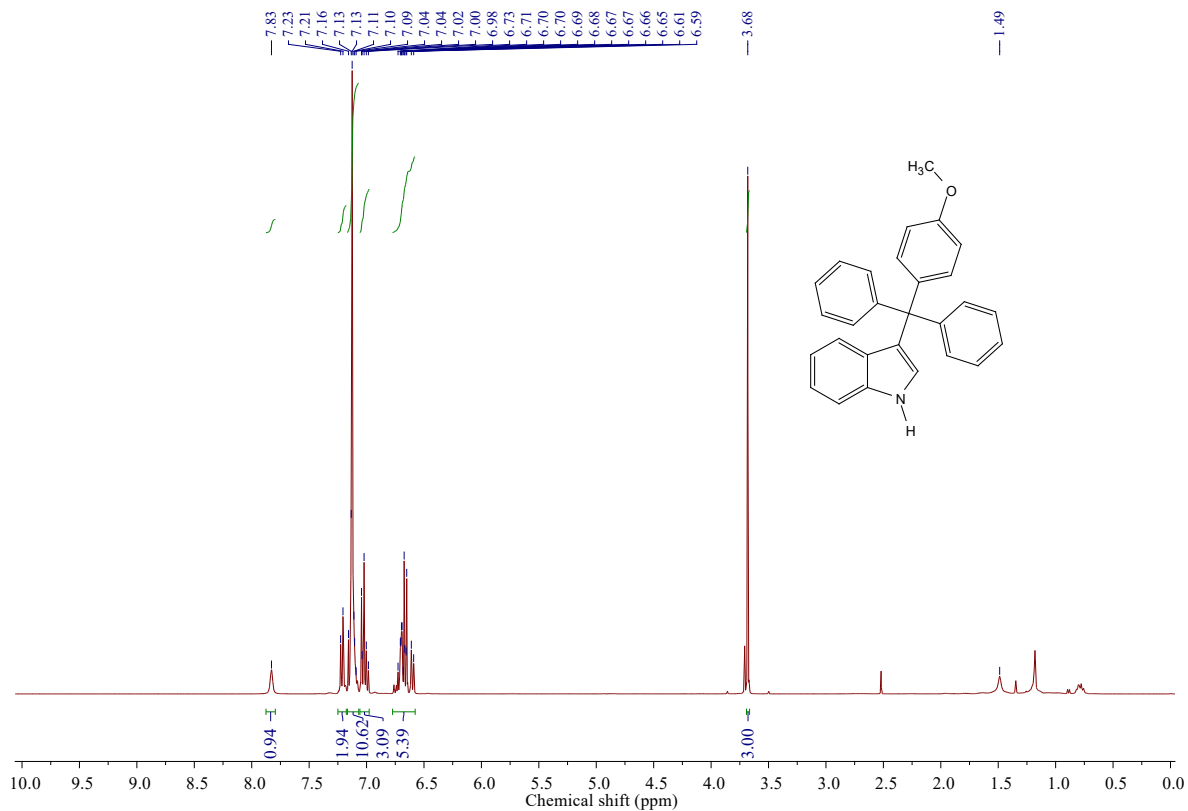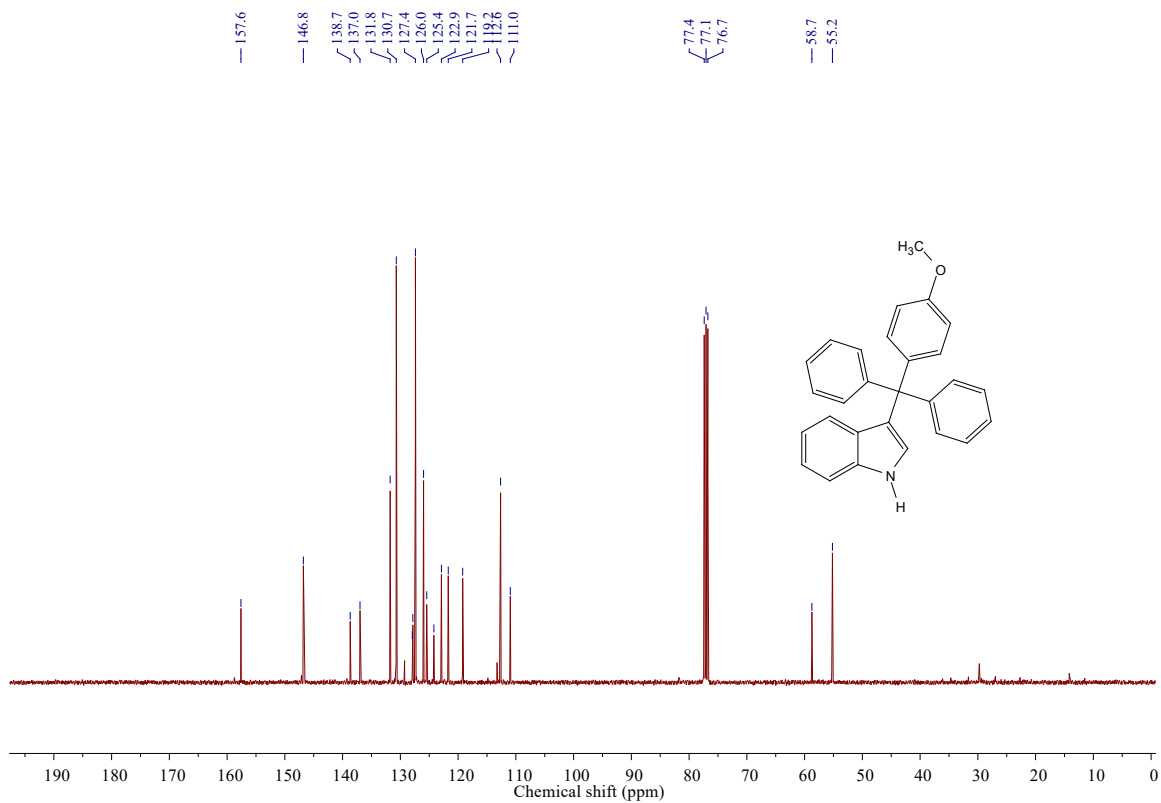

3h.

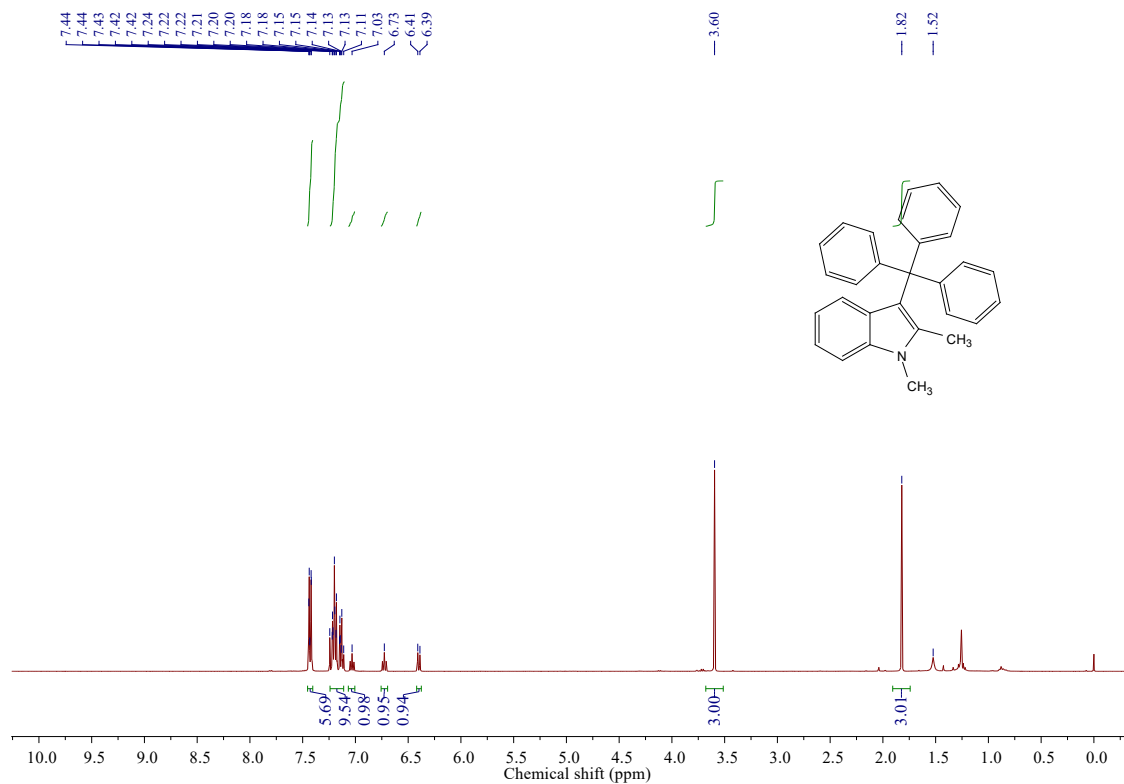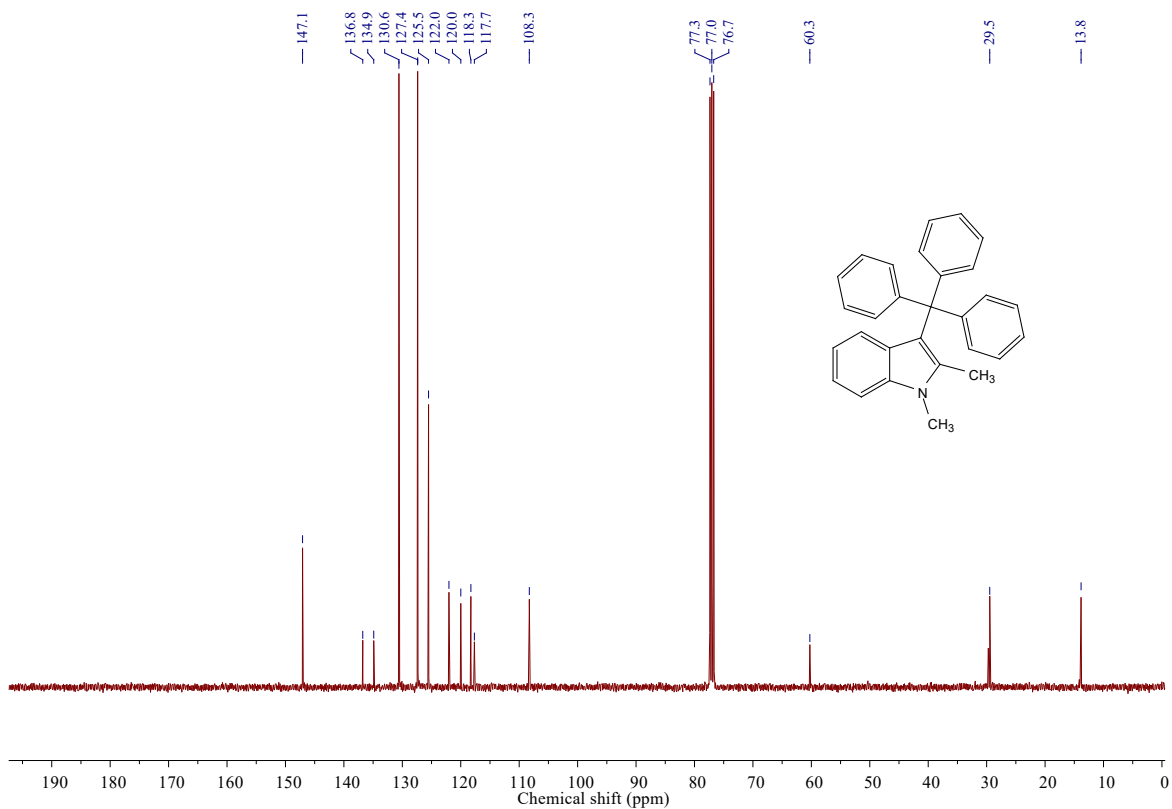

3i.

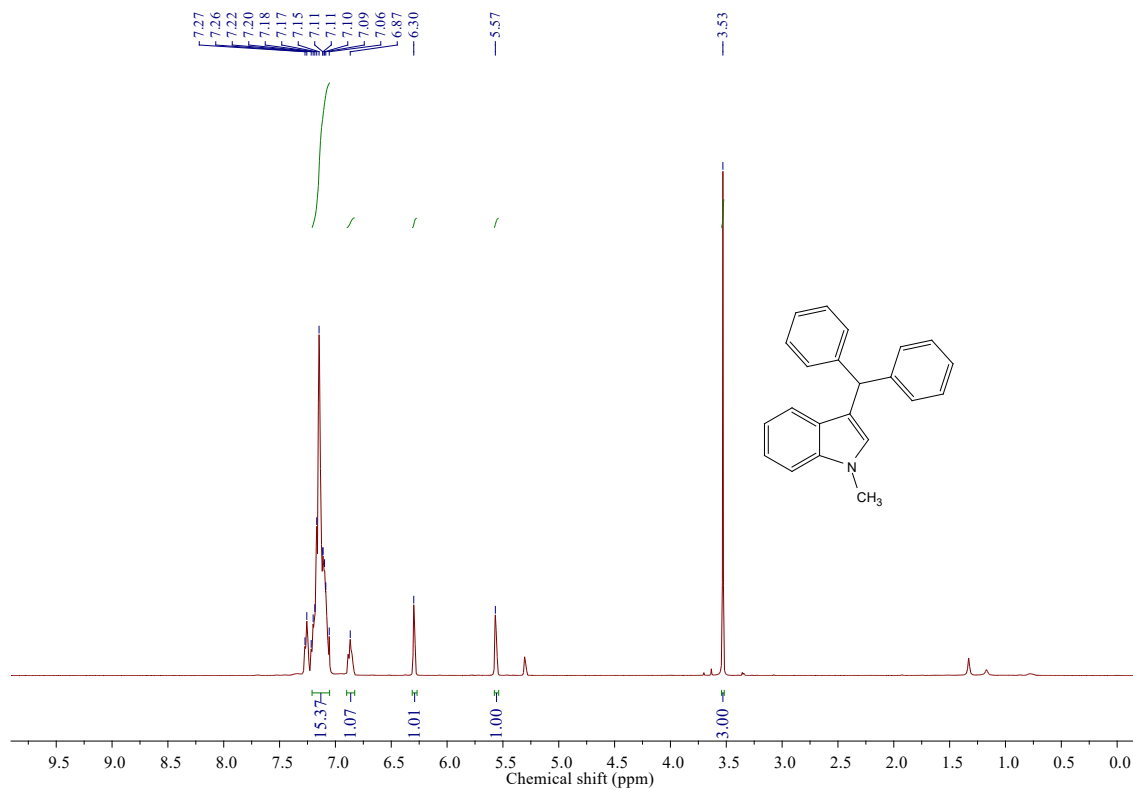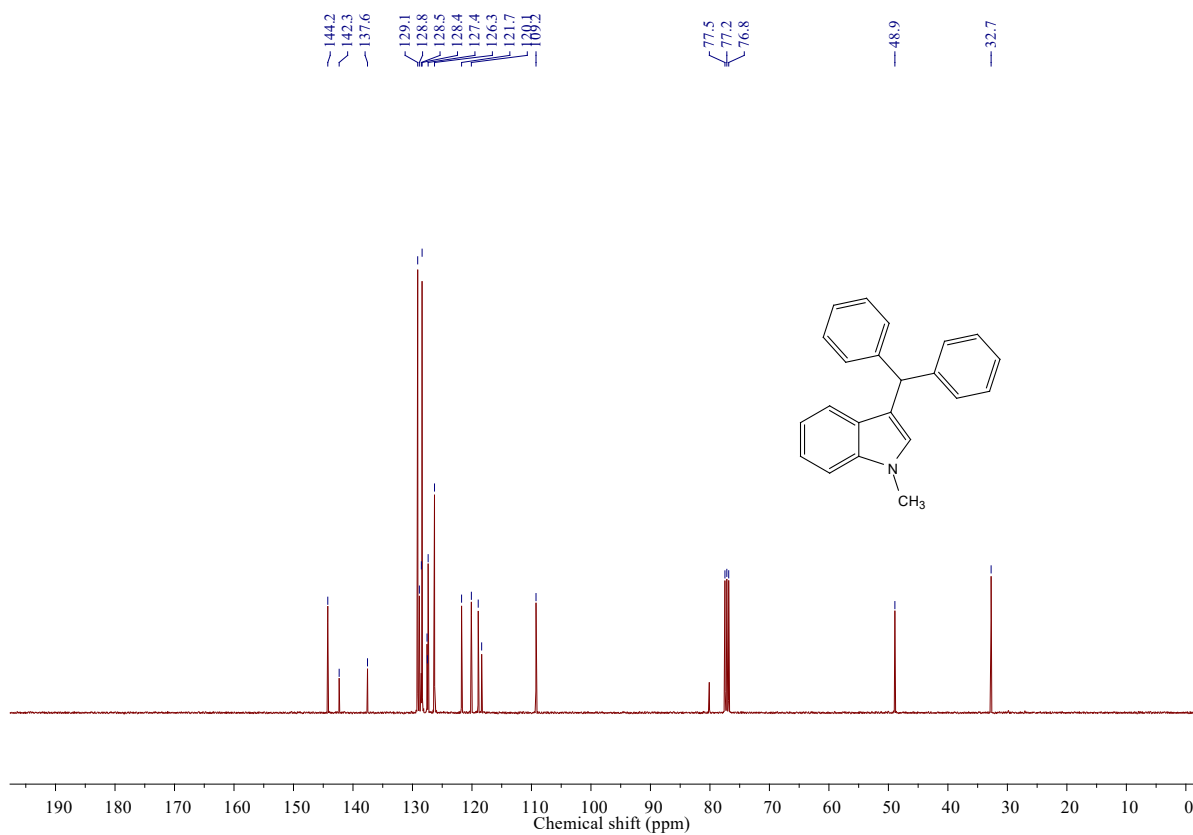

4a.

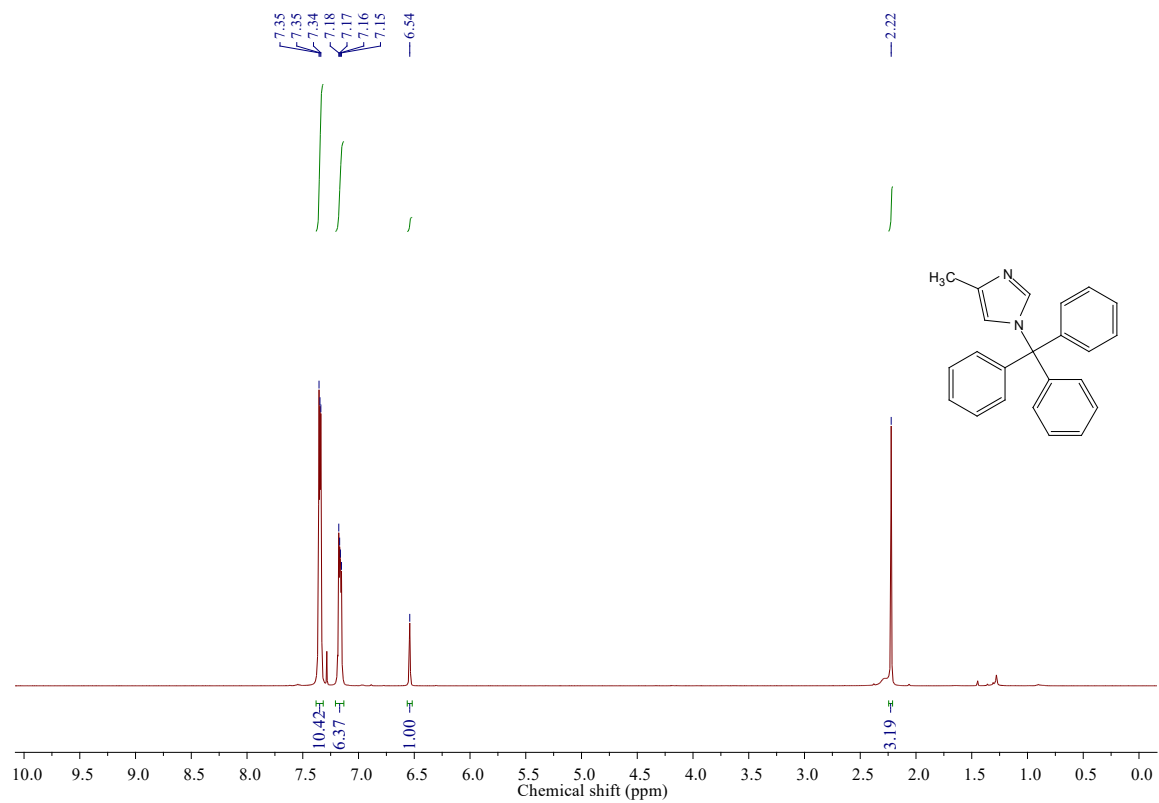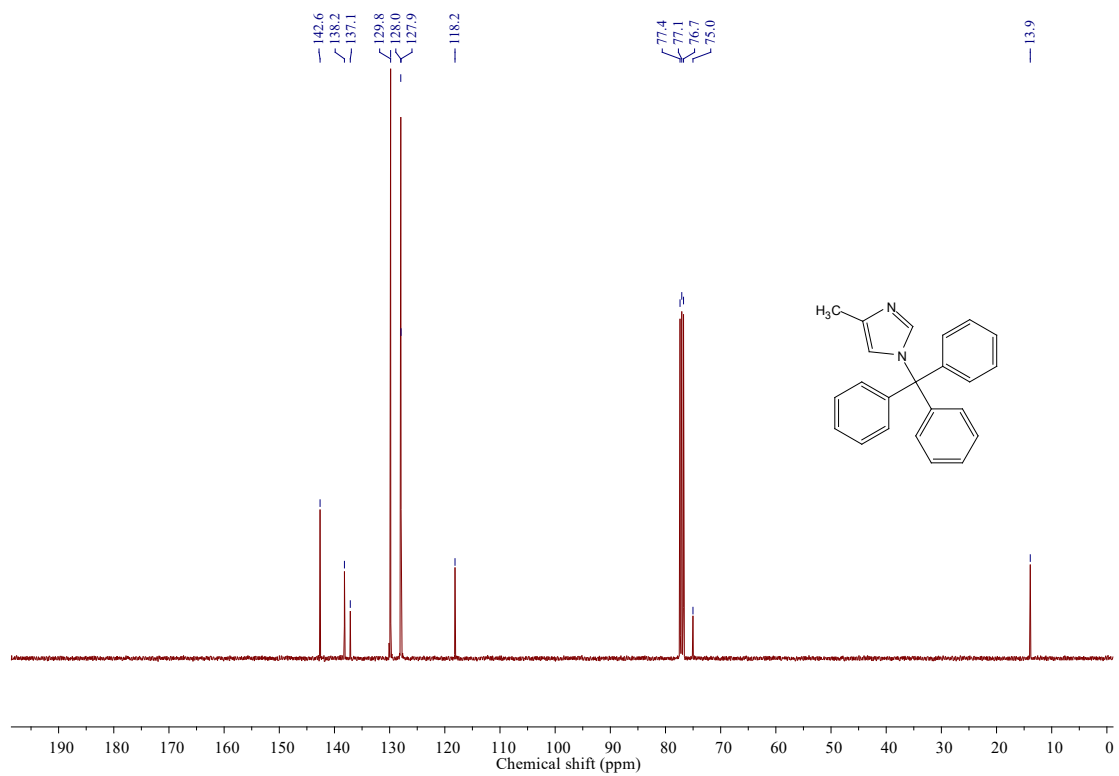



4b.

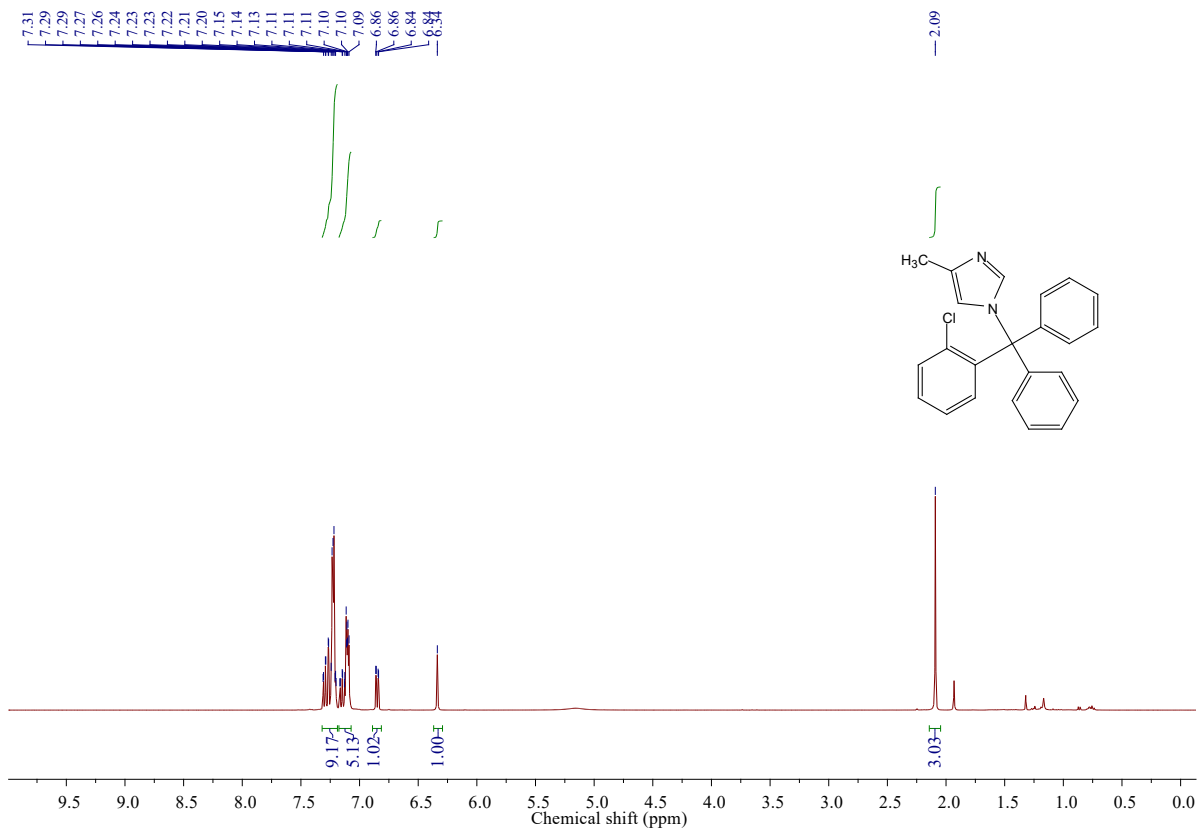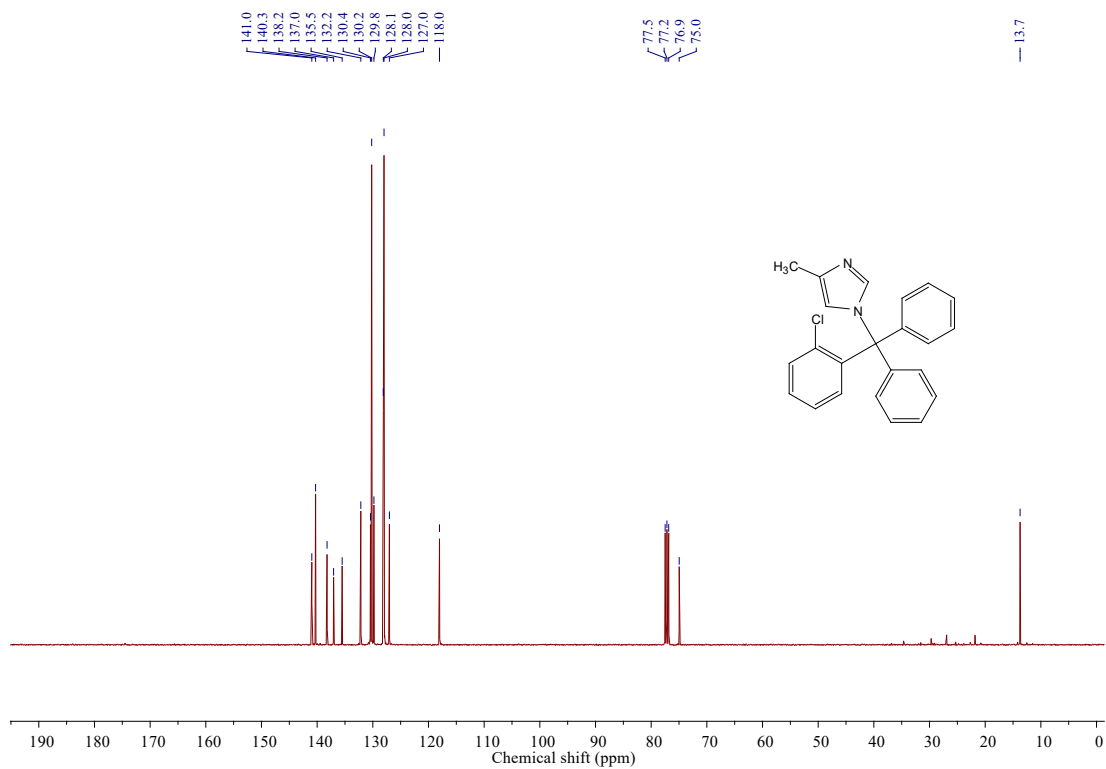

4c.

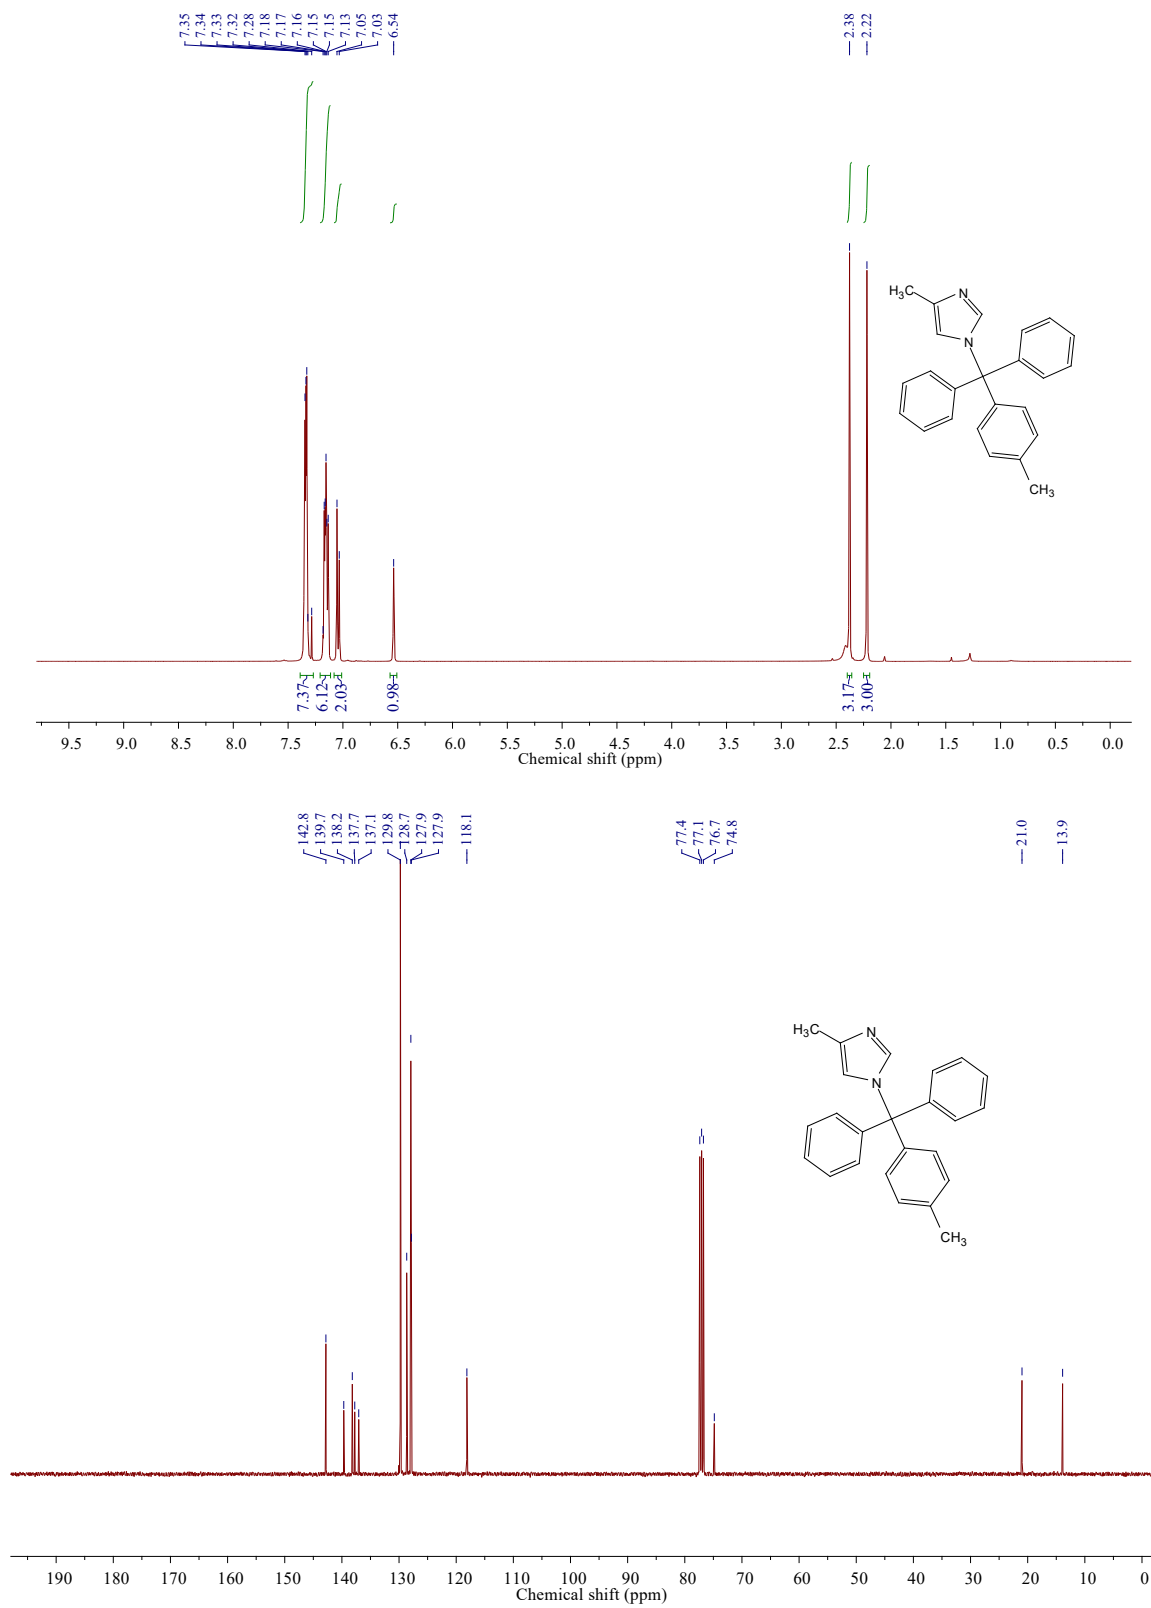

4d.

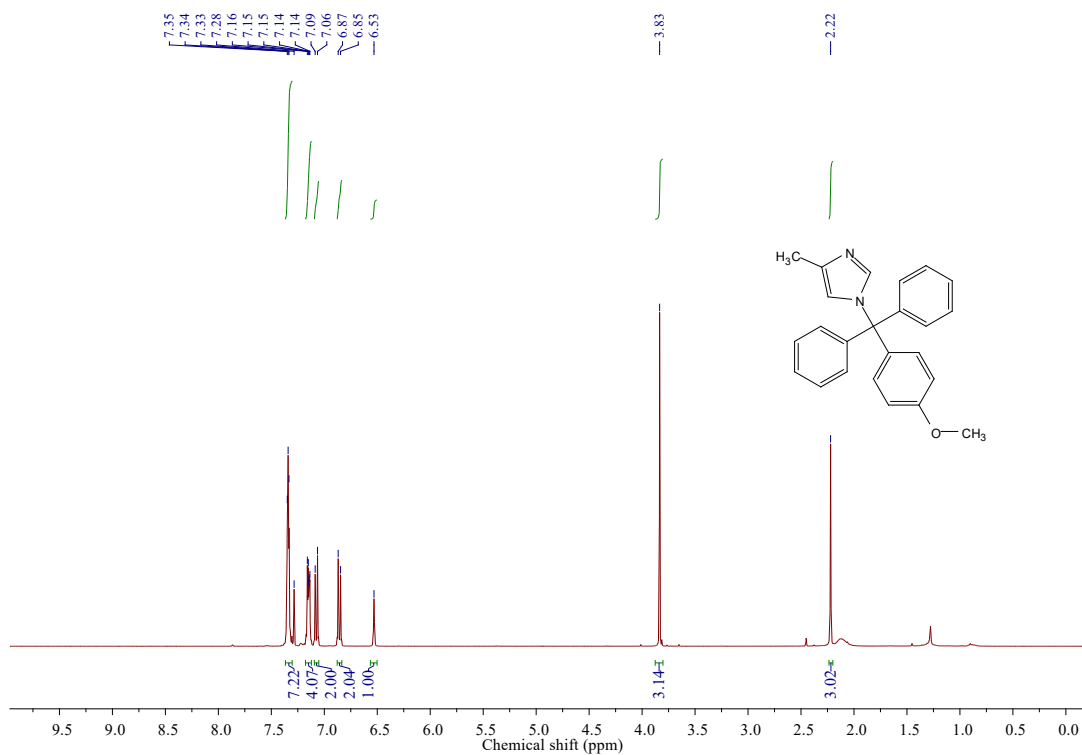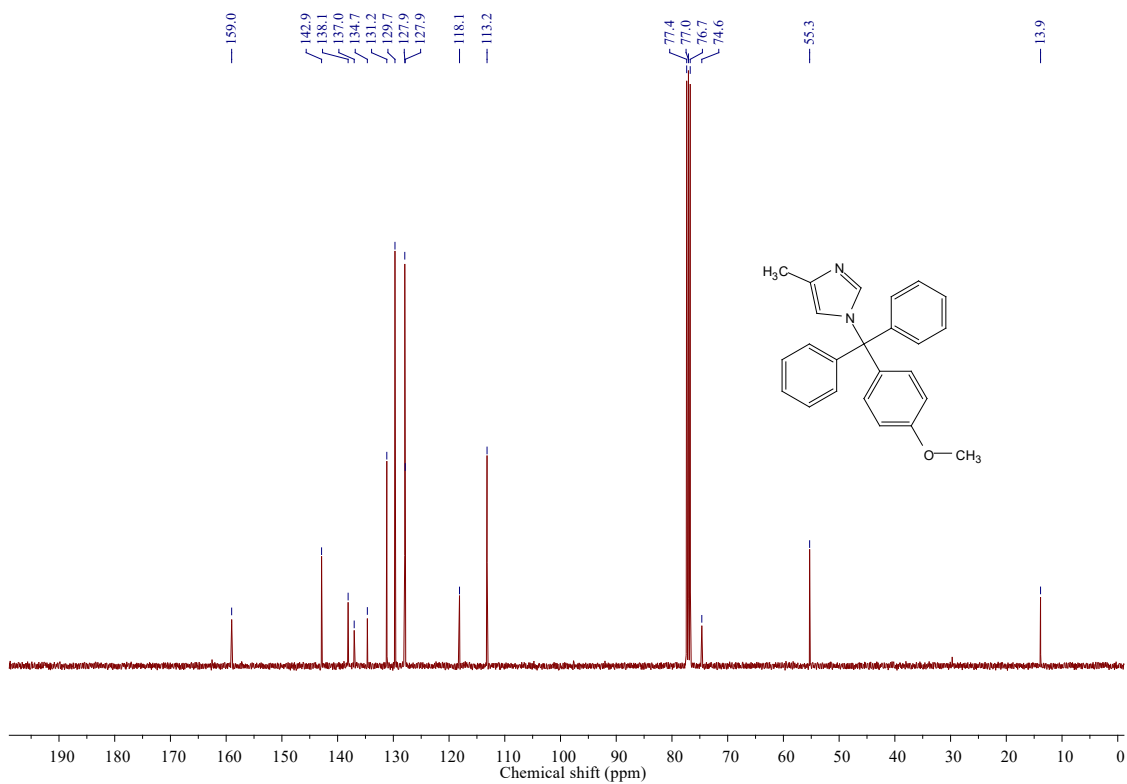

4e.

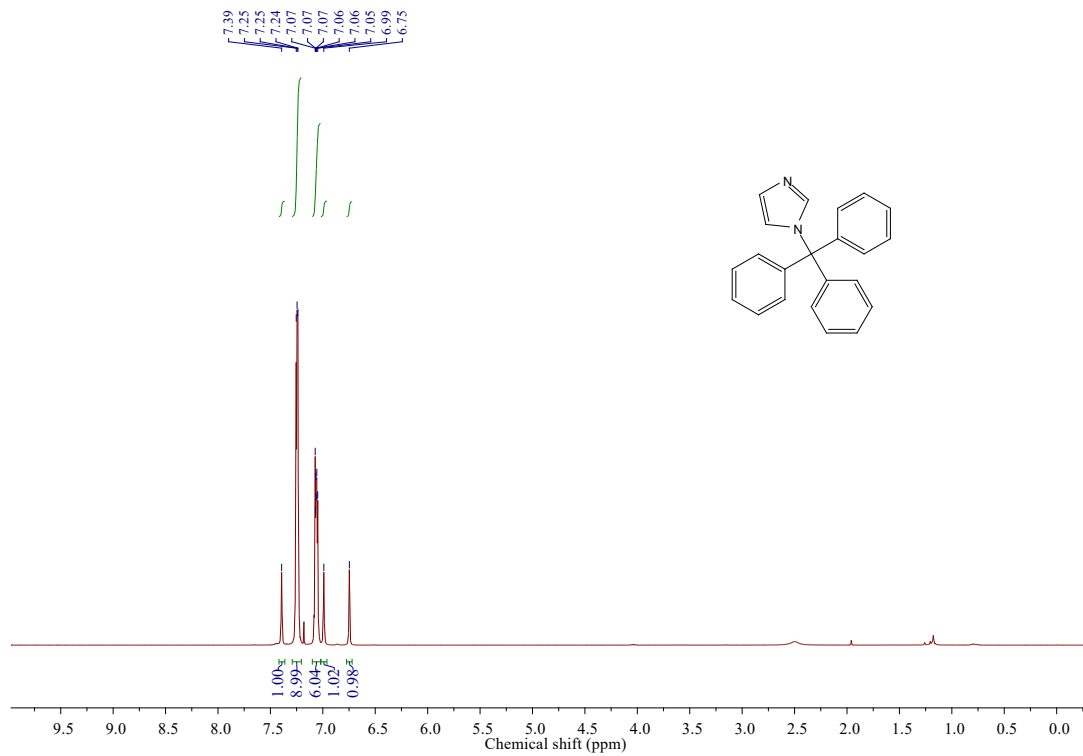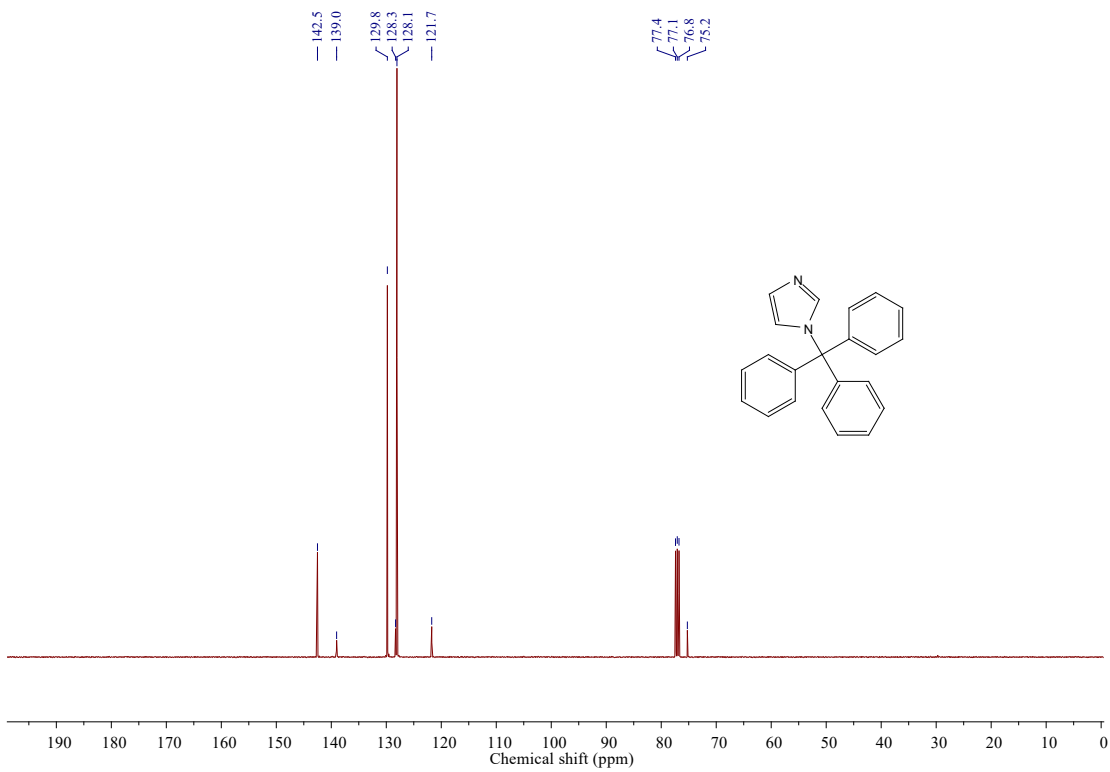

4f.

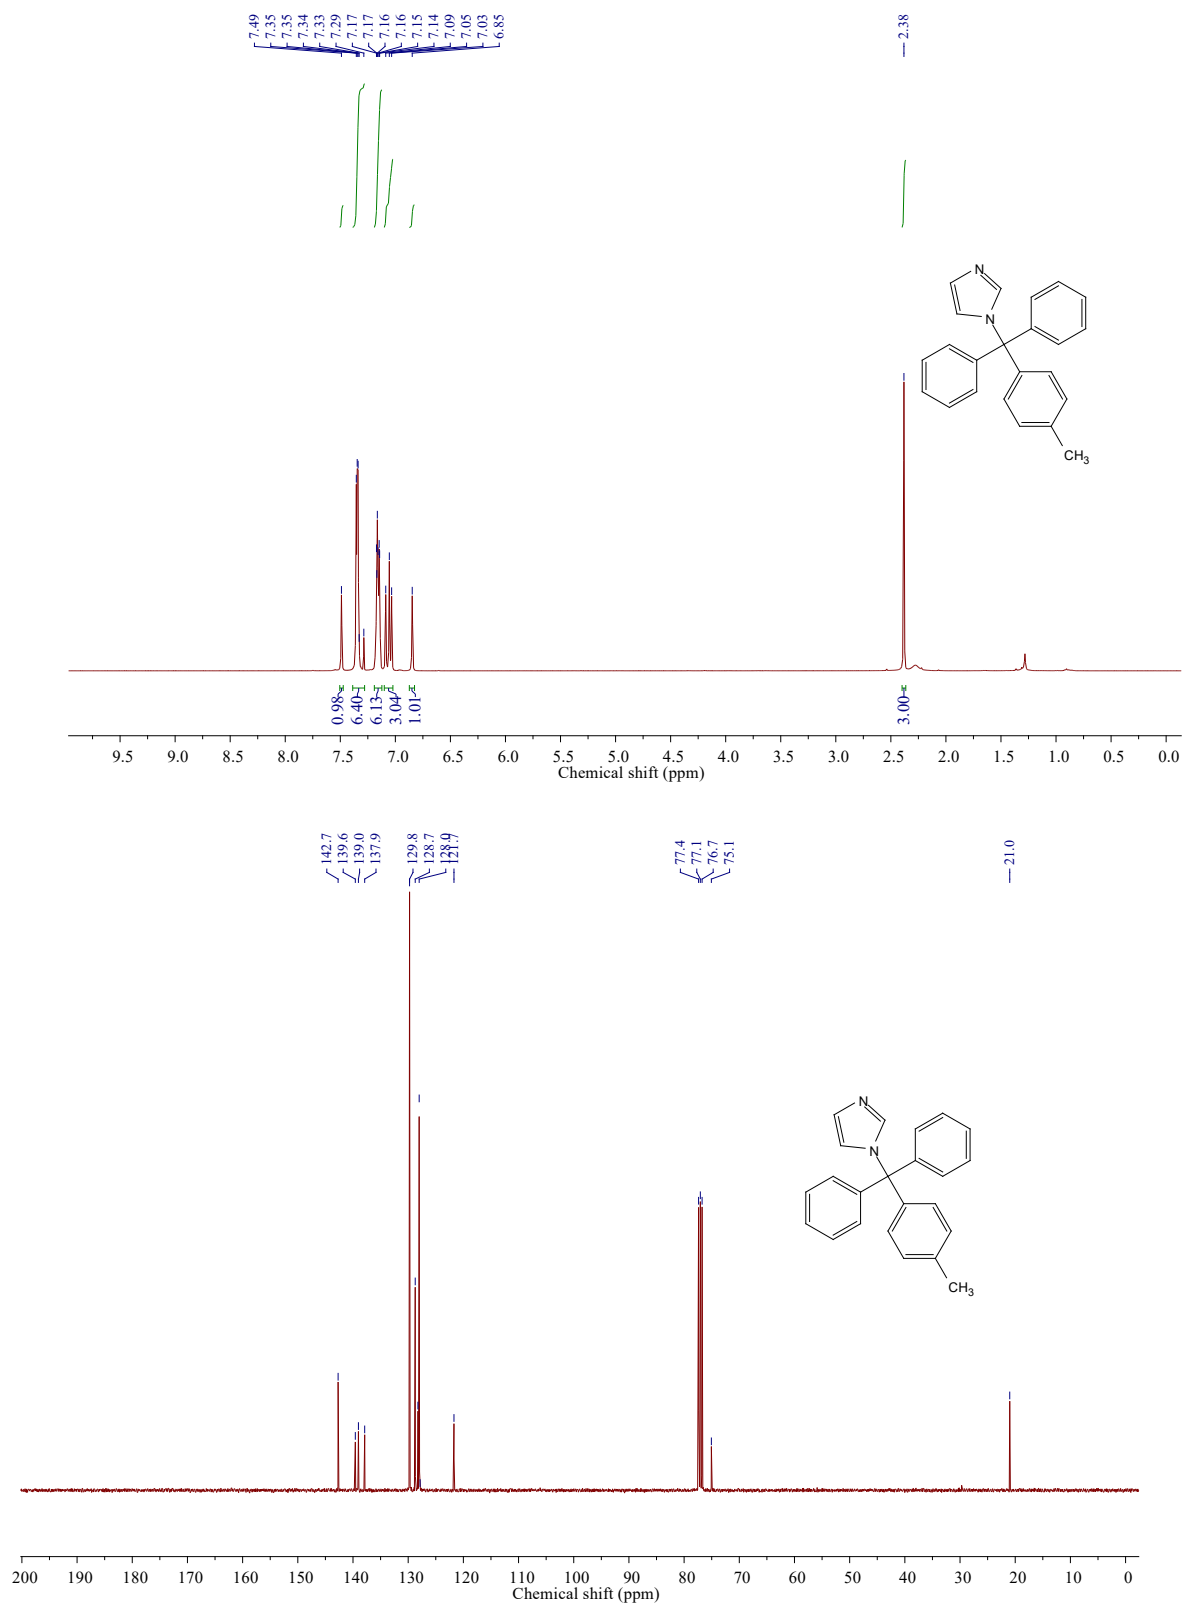

4g.

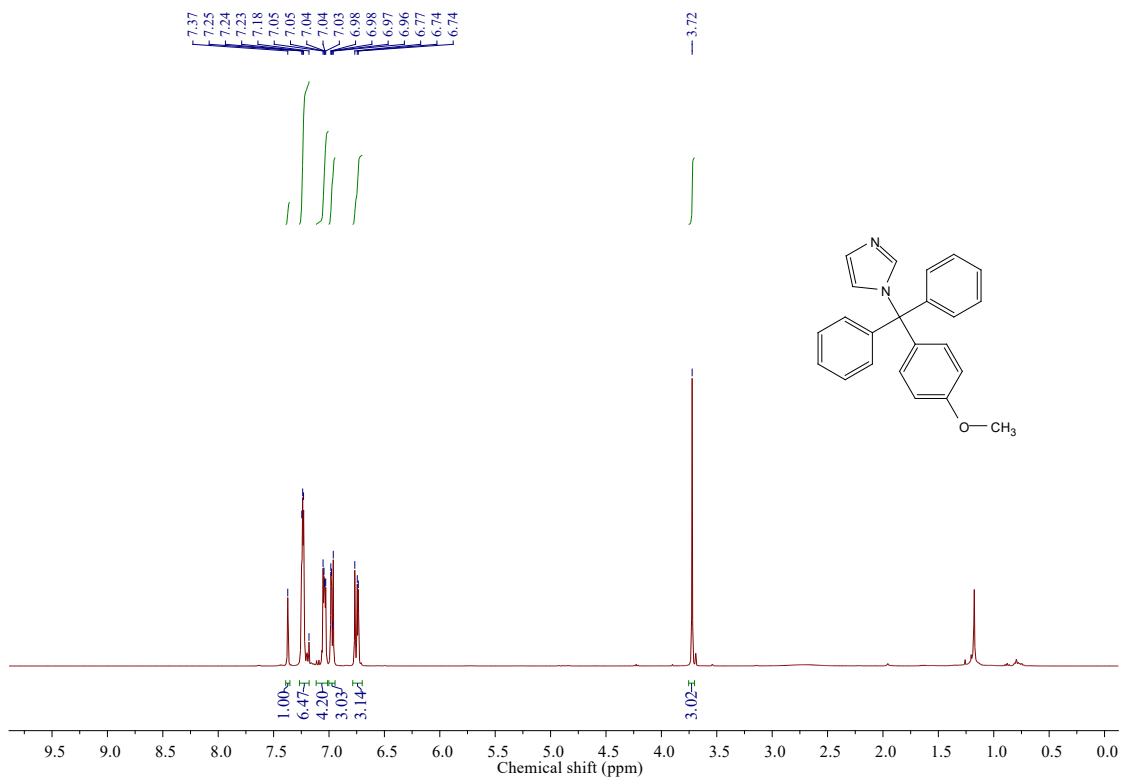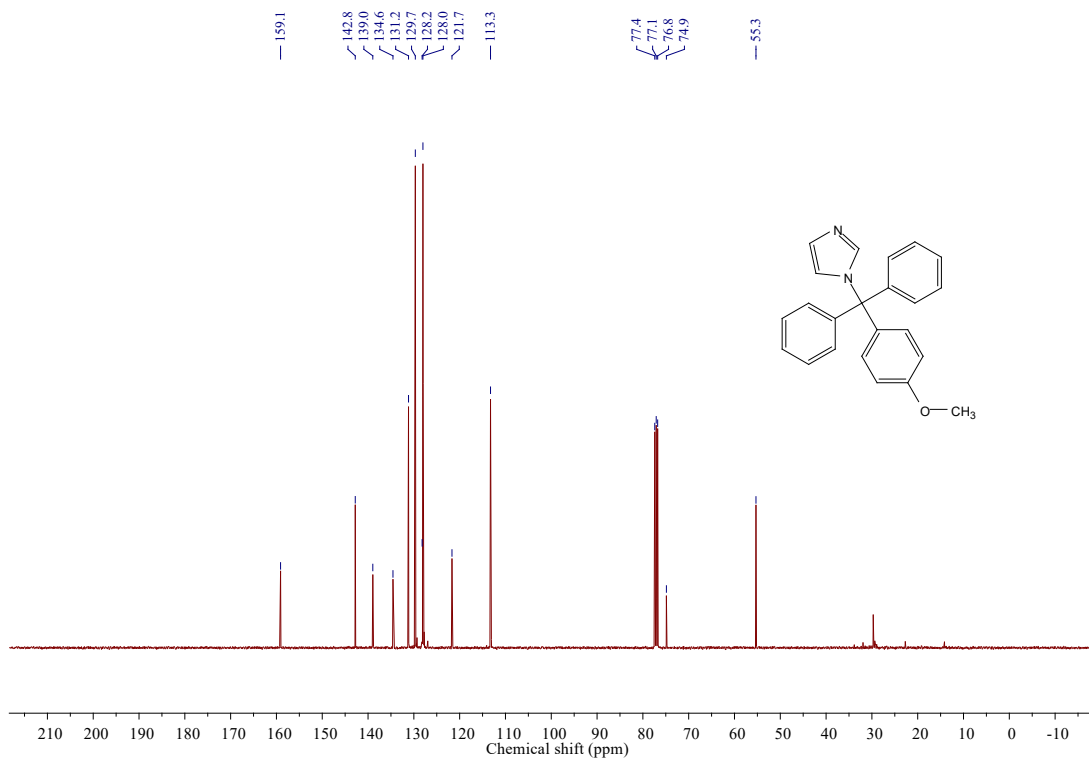

4h.

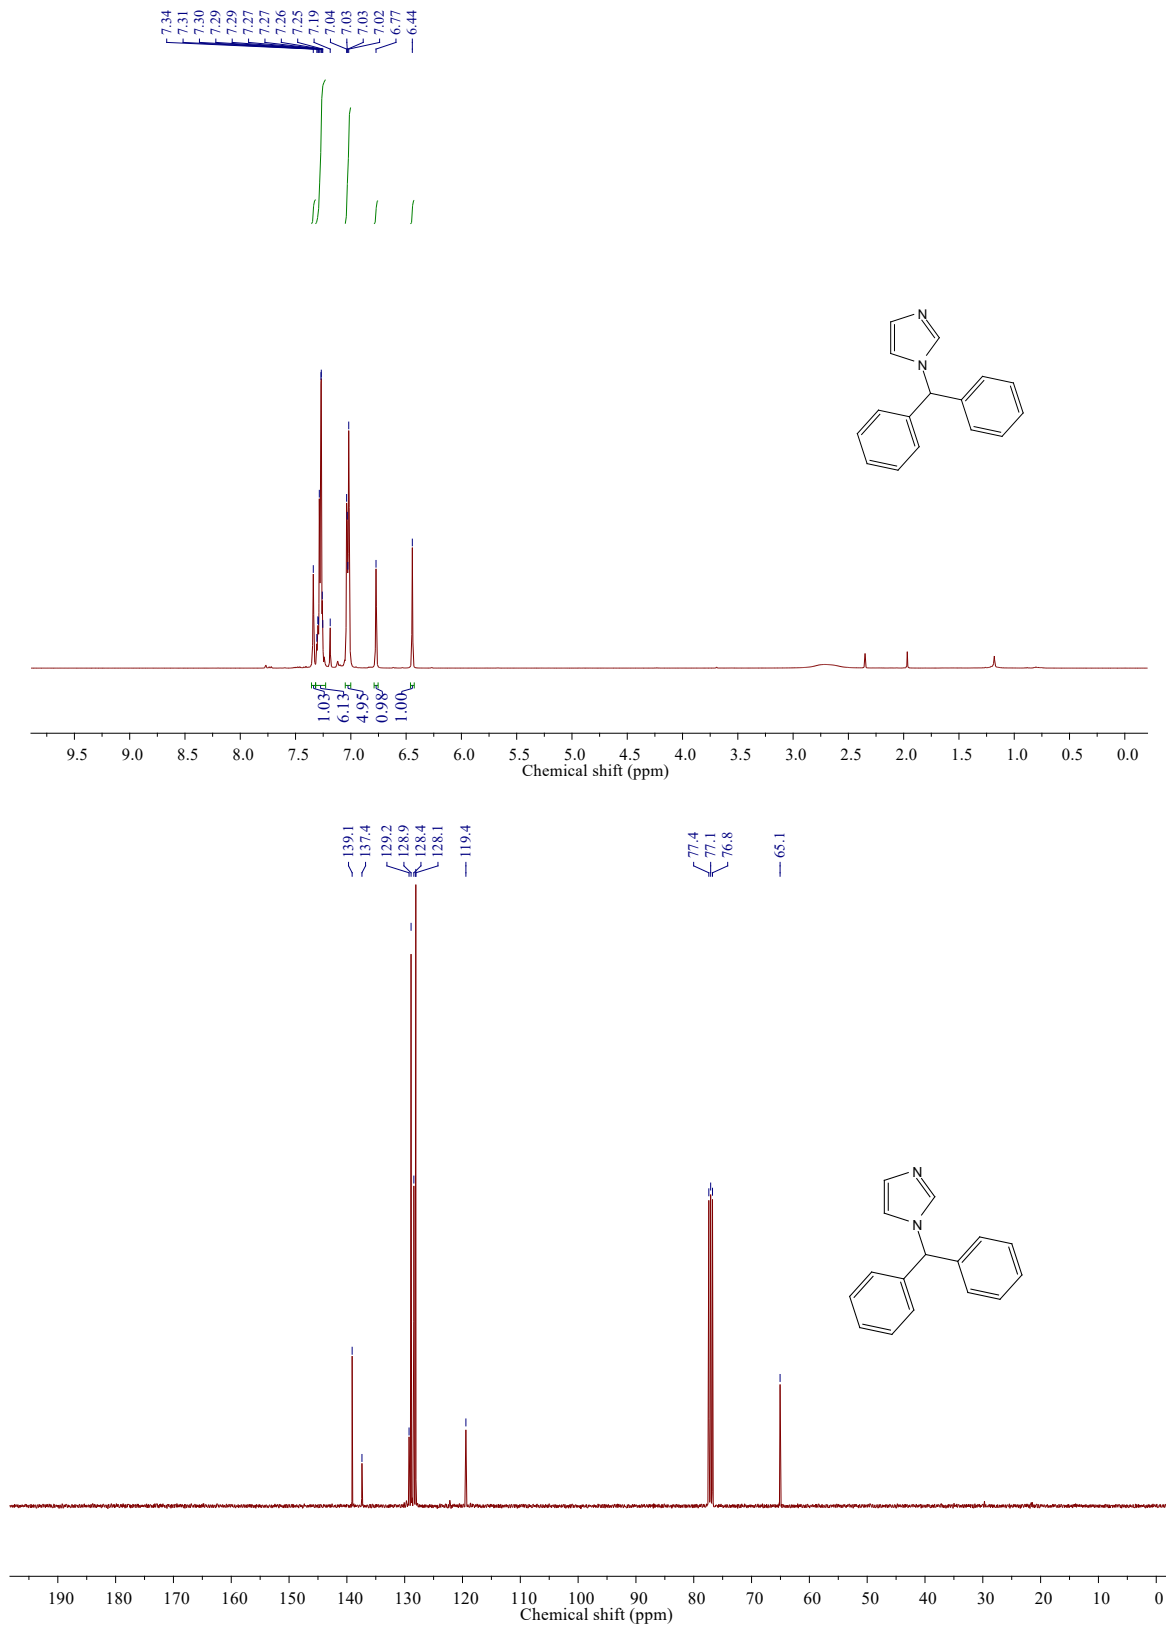

4i.

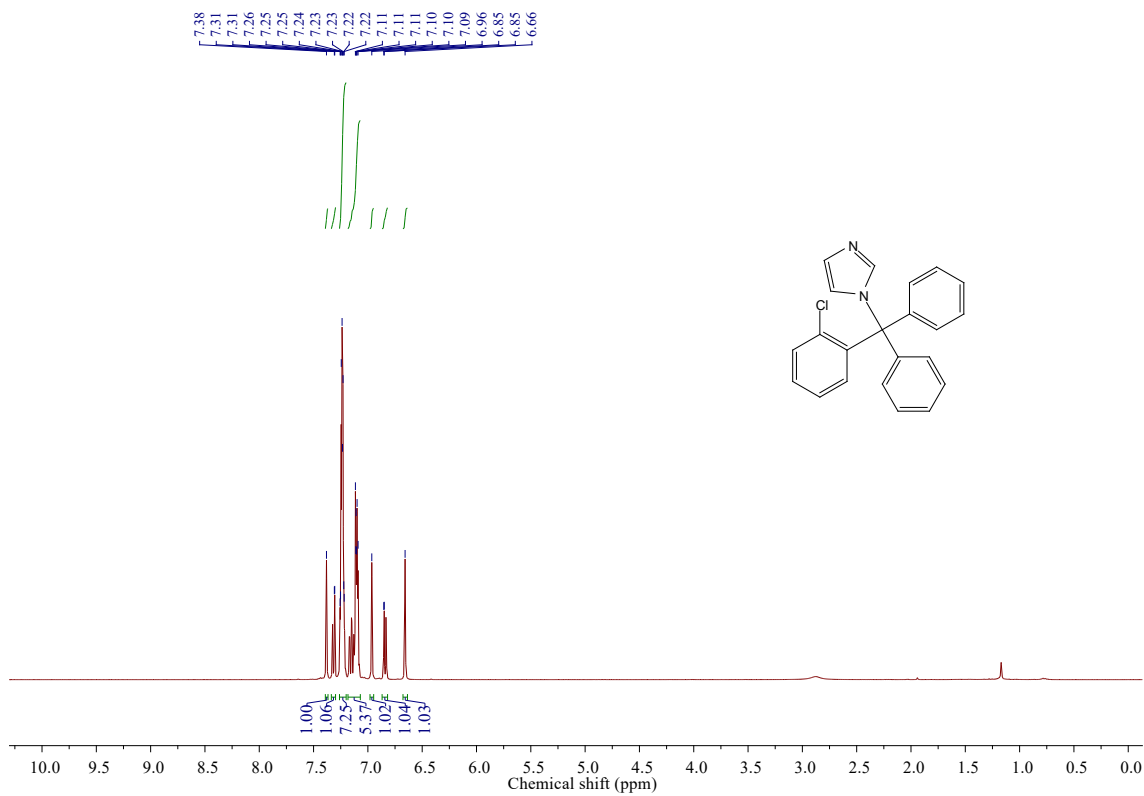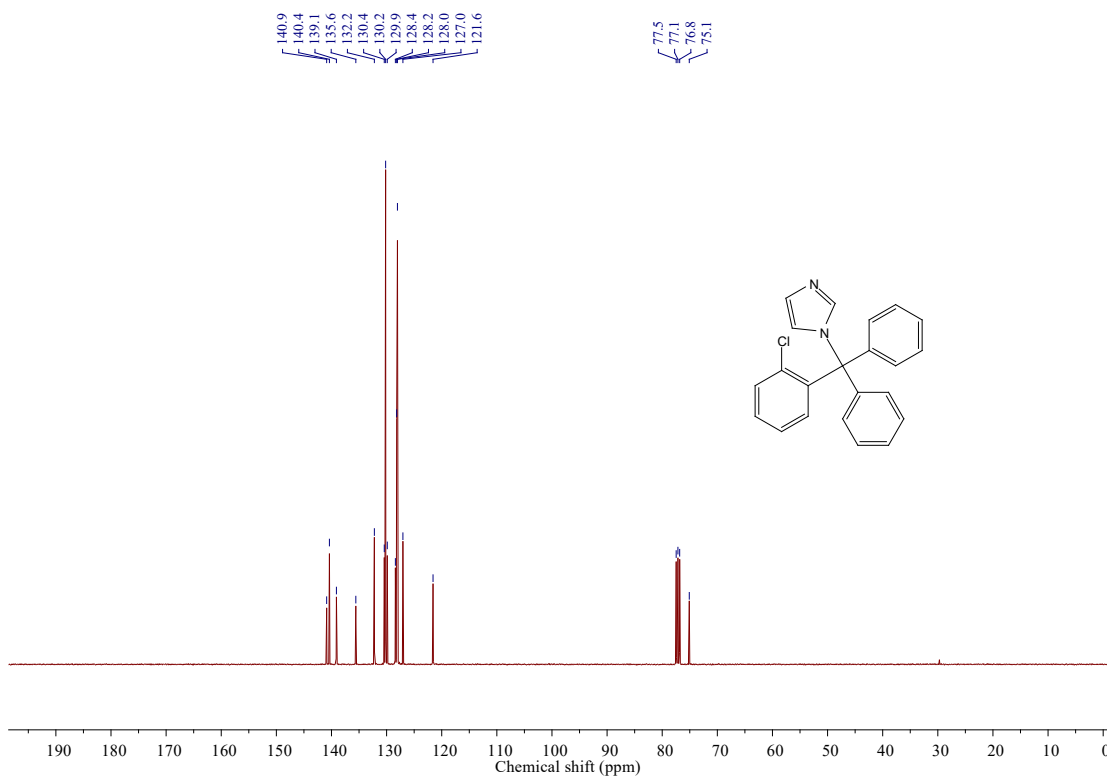



4j.

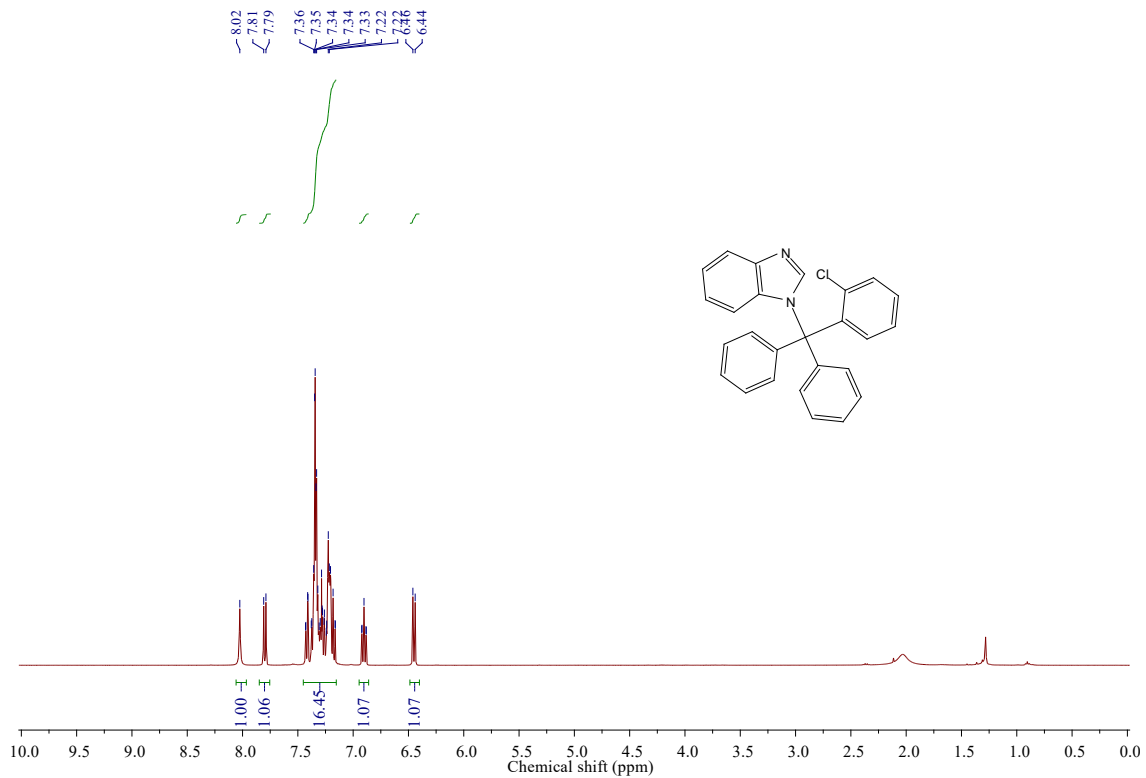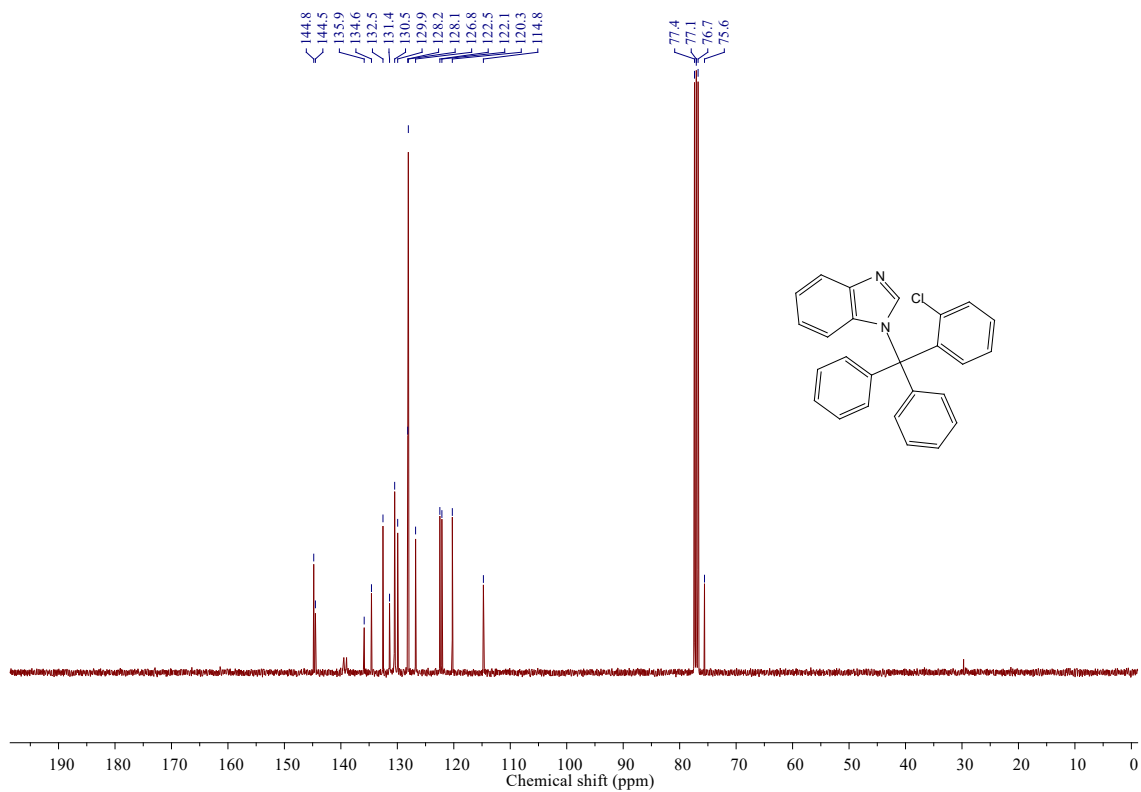

4k.

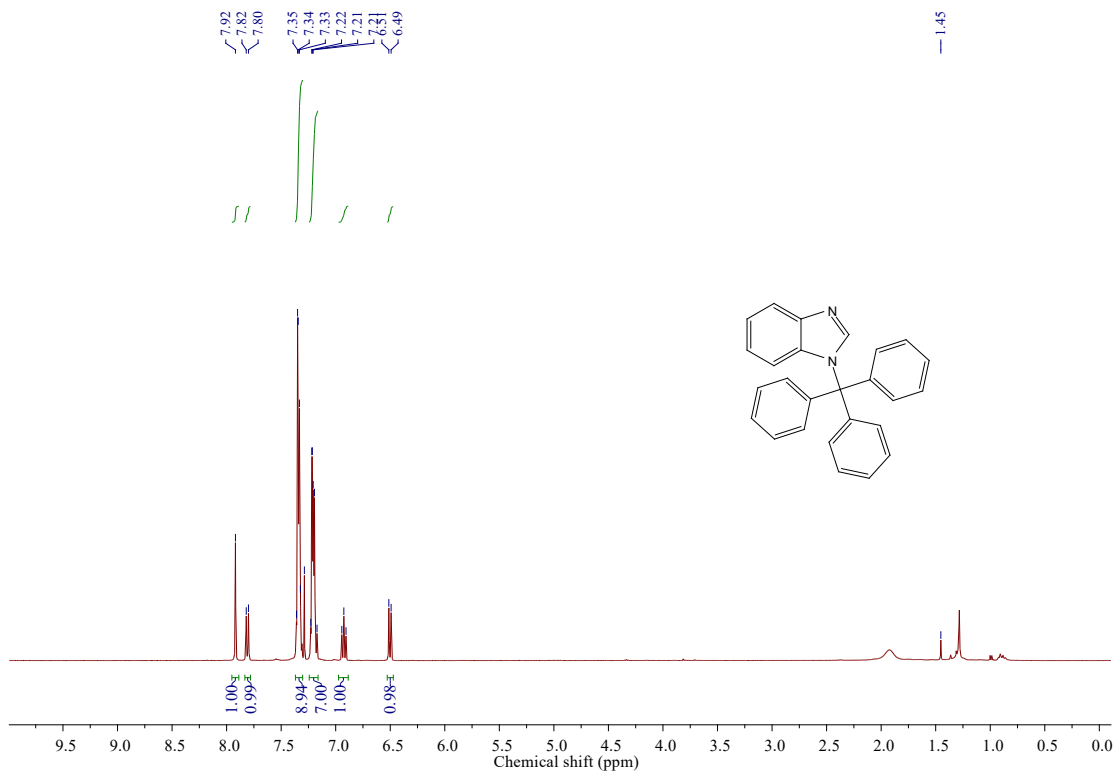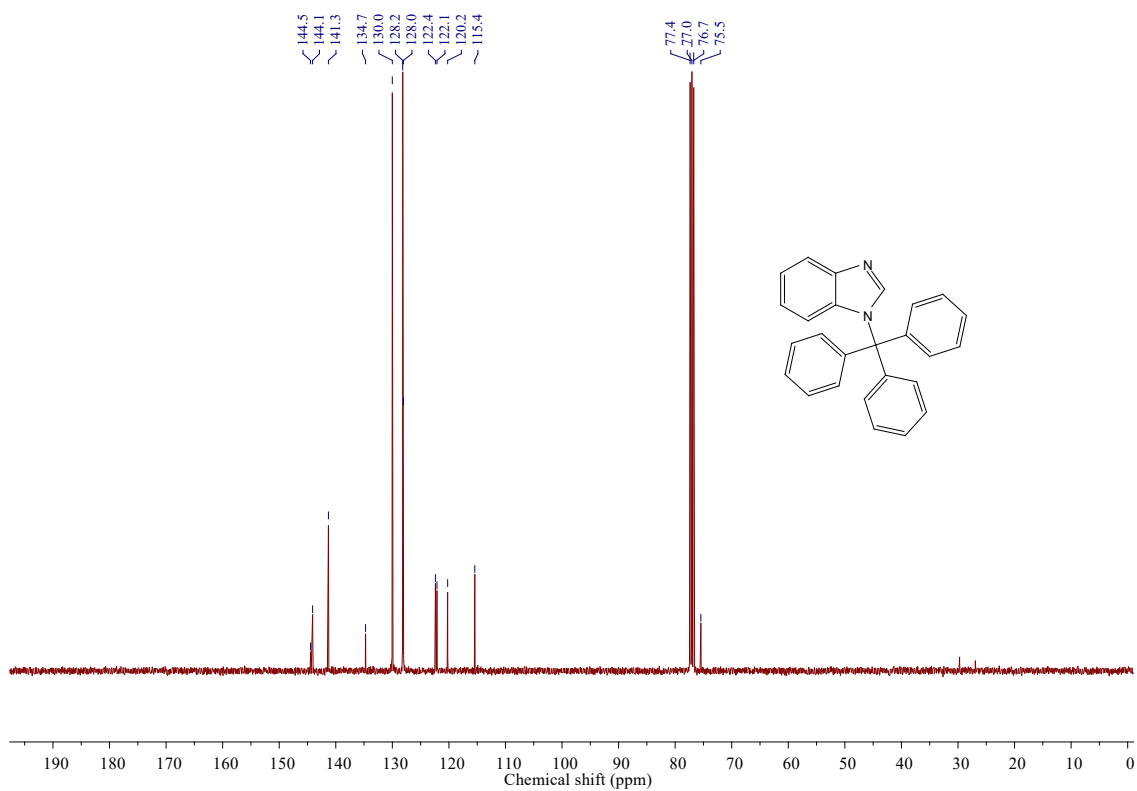

41.

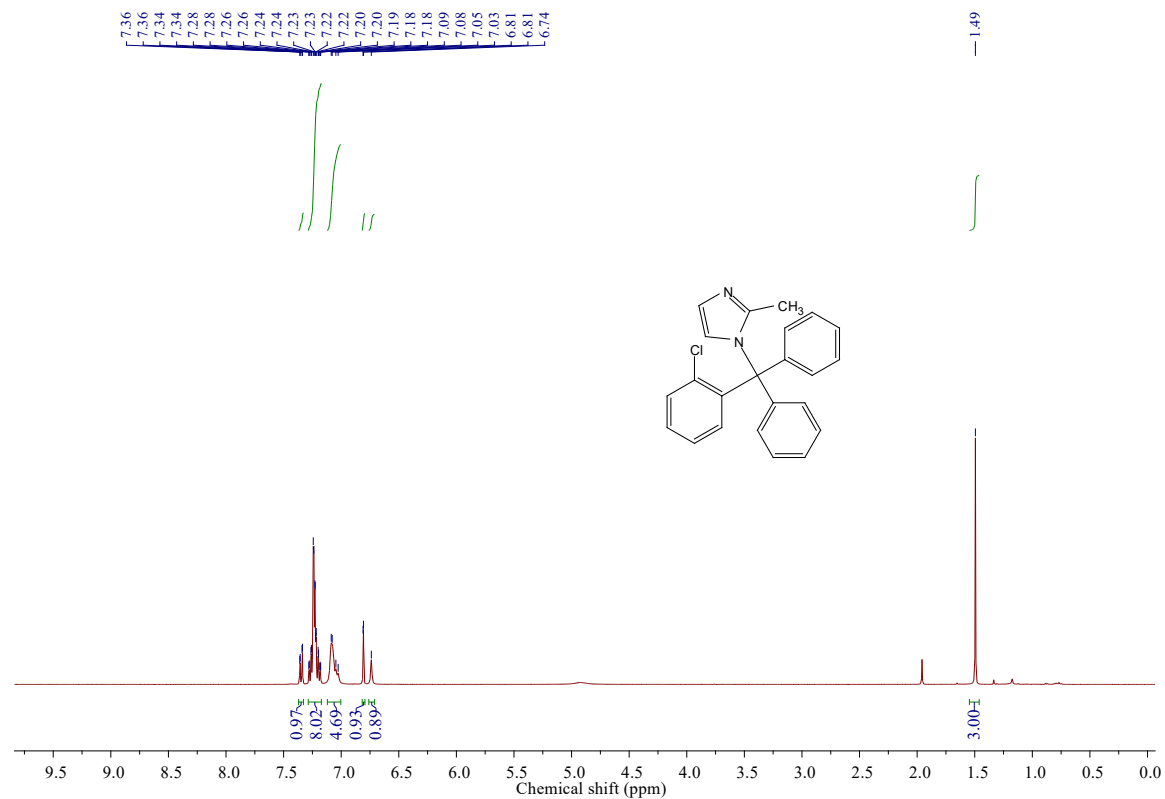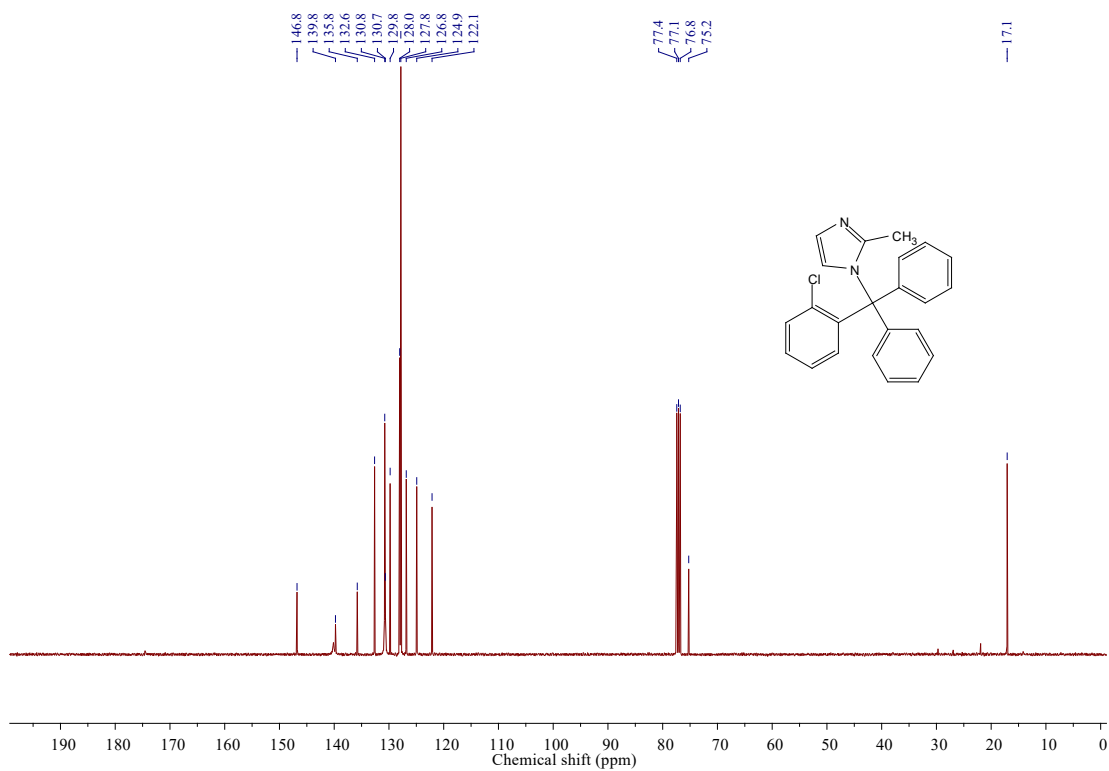

# Mass spectra

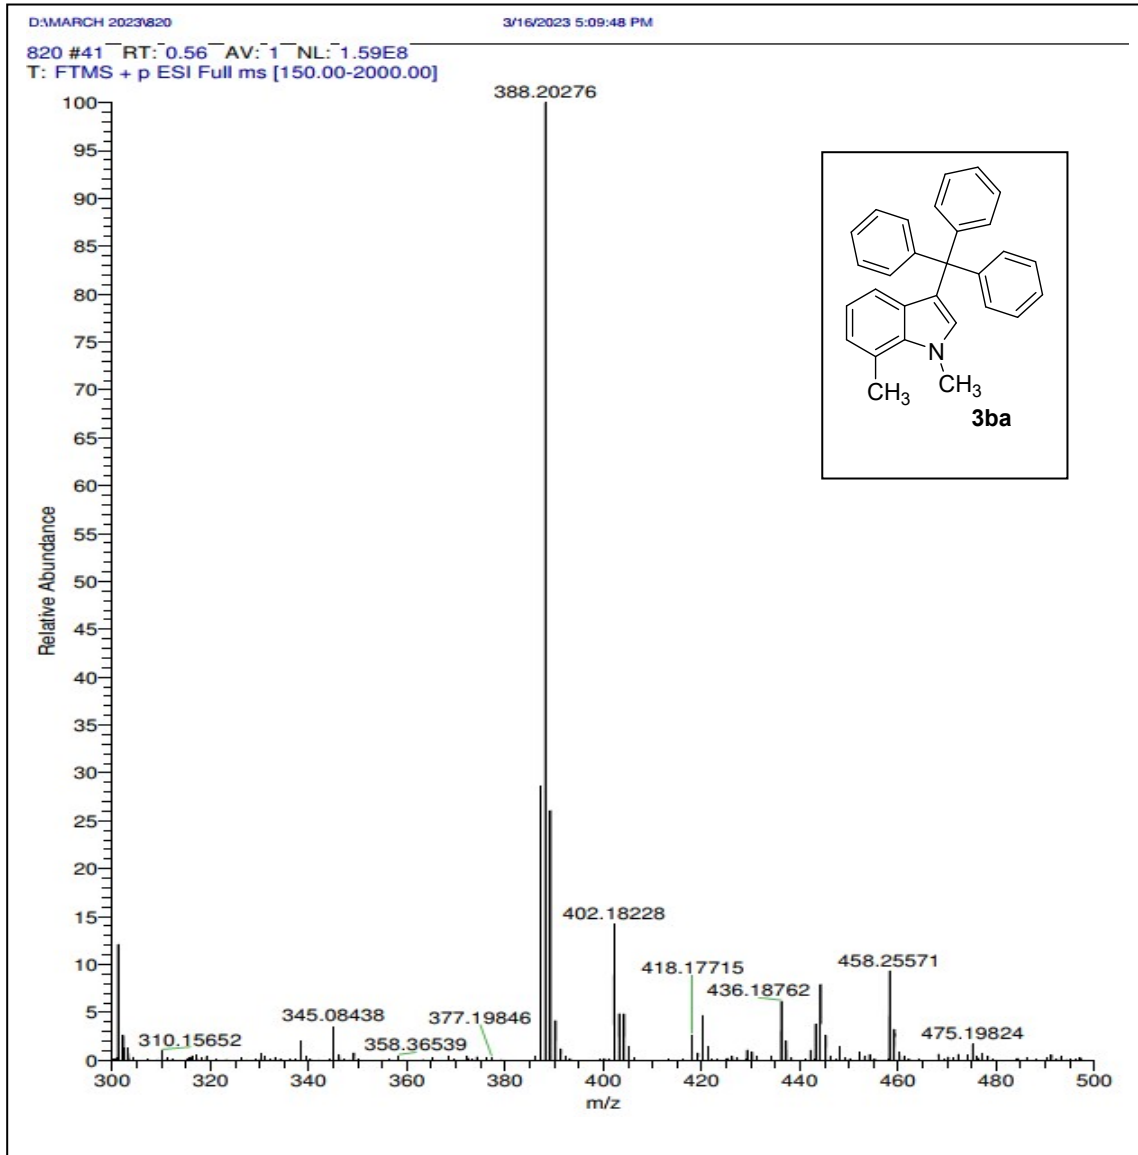

846 #73 RT: 1.01 AV: 1 NL: 4.95E7  
T: FTMS + p ESI Full ms [150.00-2000.00]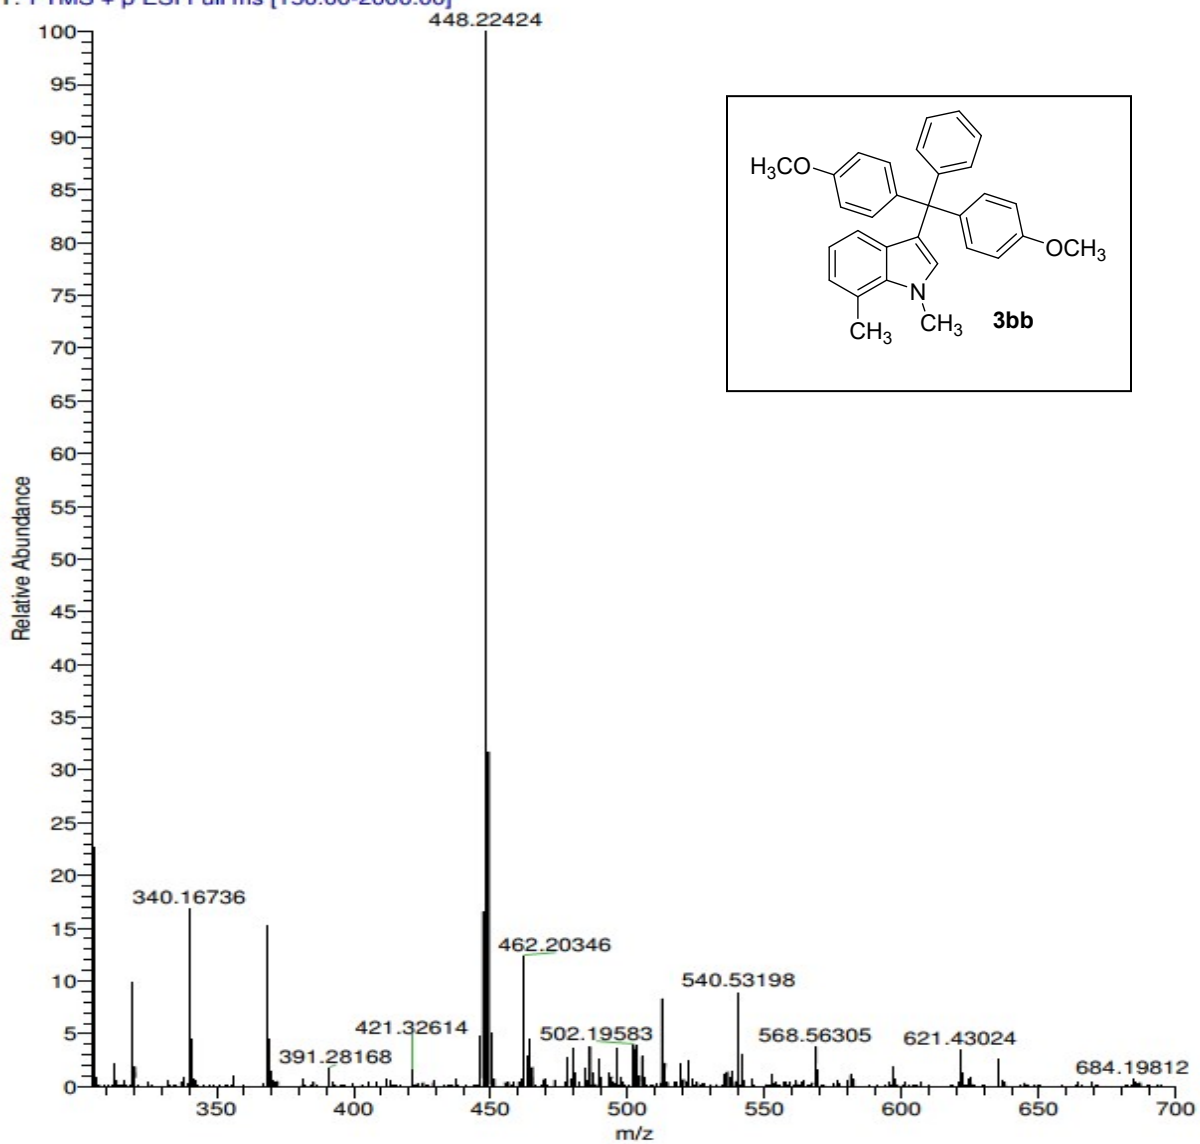

865 #23 RT: 0.31 AV: 1 NL: 2.99E8  
T: FTMS + p ESI Full ms [150.00-2000.00]

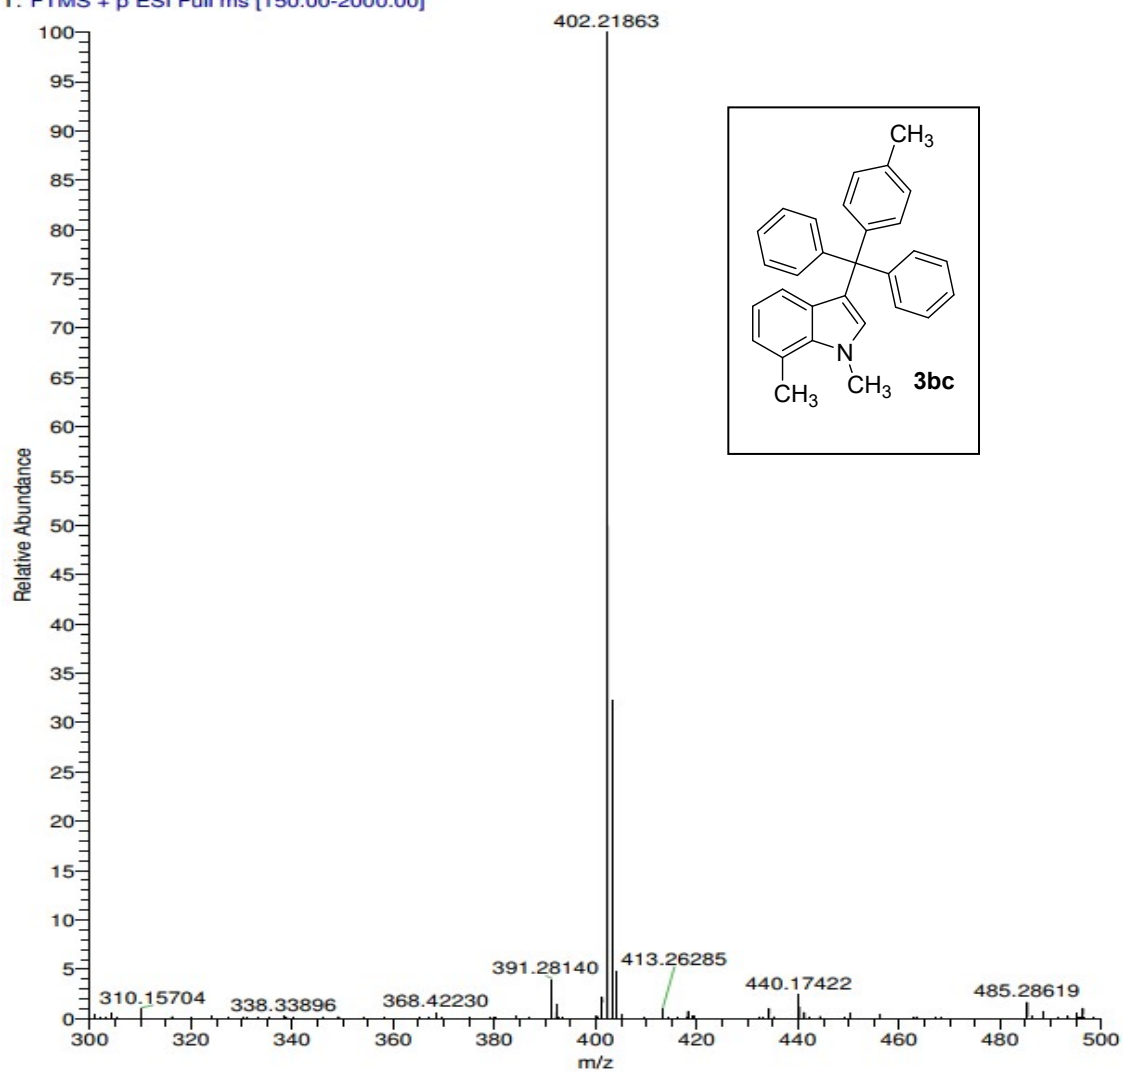

867\_230406130909 #75 RT: 1.04 AV: 1 NL: 7.61E7  
T: FTMS + p ESI Full ms [150.00-2000.00]

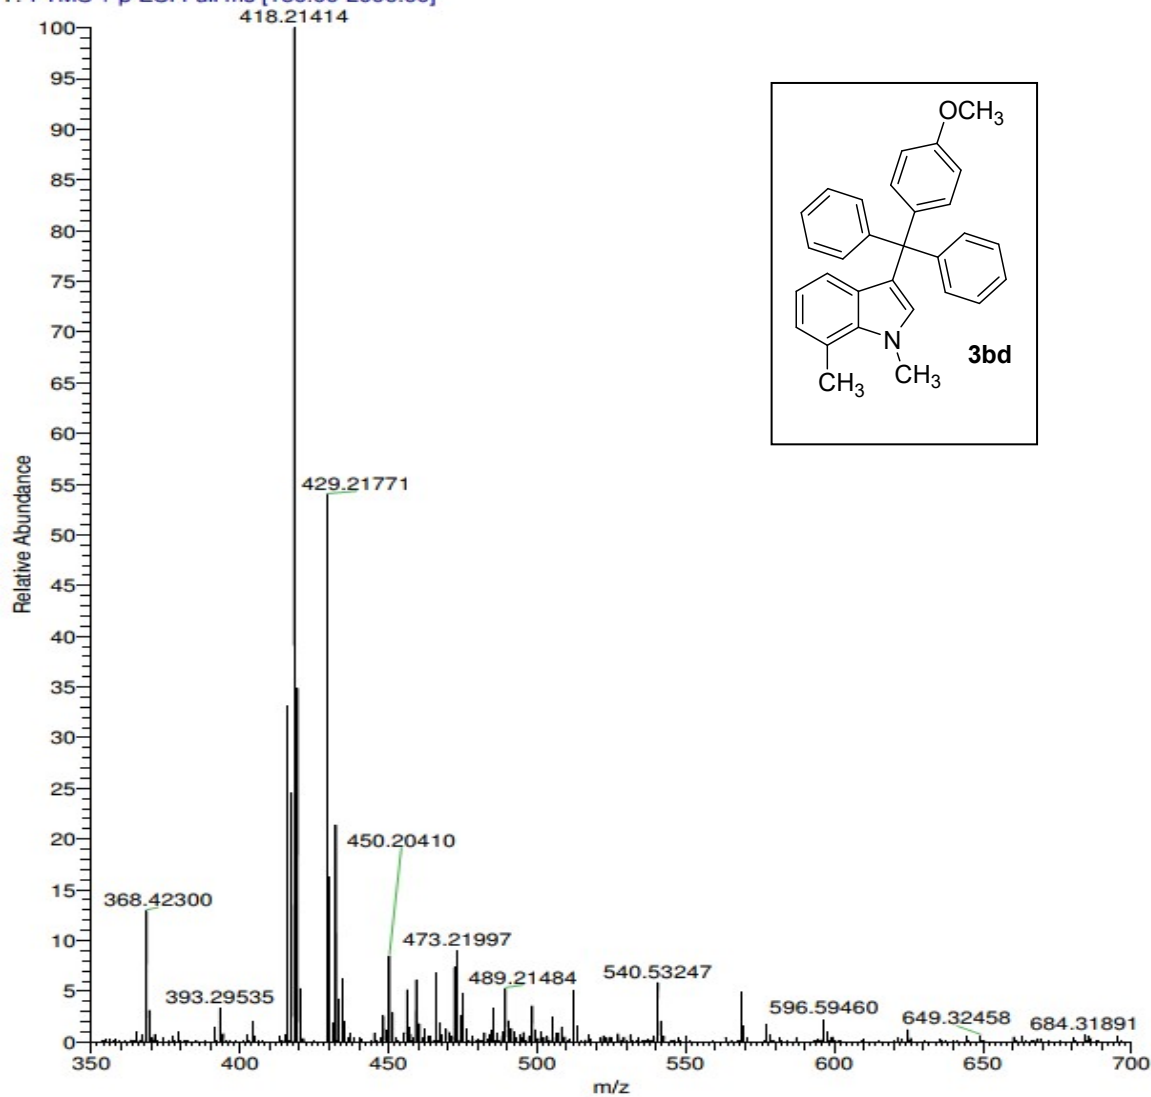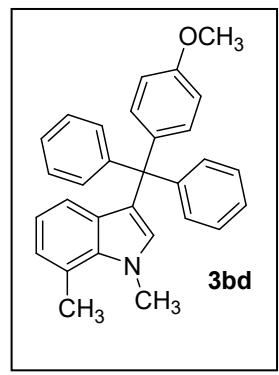

850 #43 RT: 0.59 AV: 1 NL: 2.78E7  
T: FTMS + p ESI Full ms [150.00-2000.00]

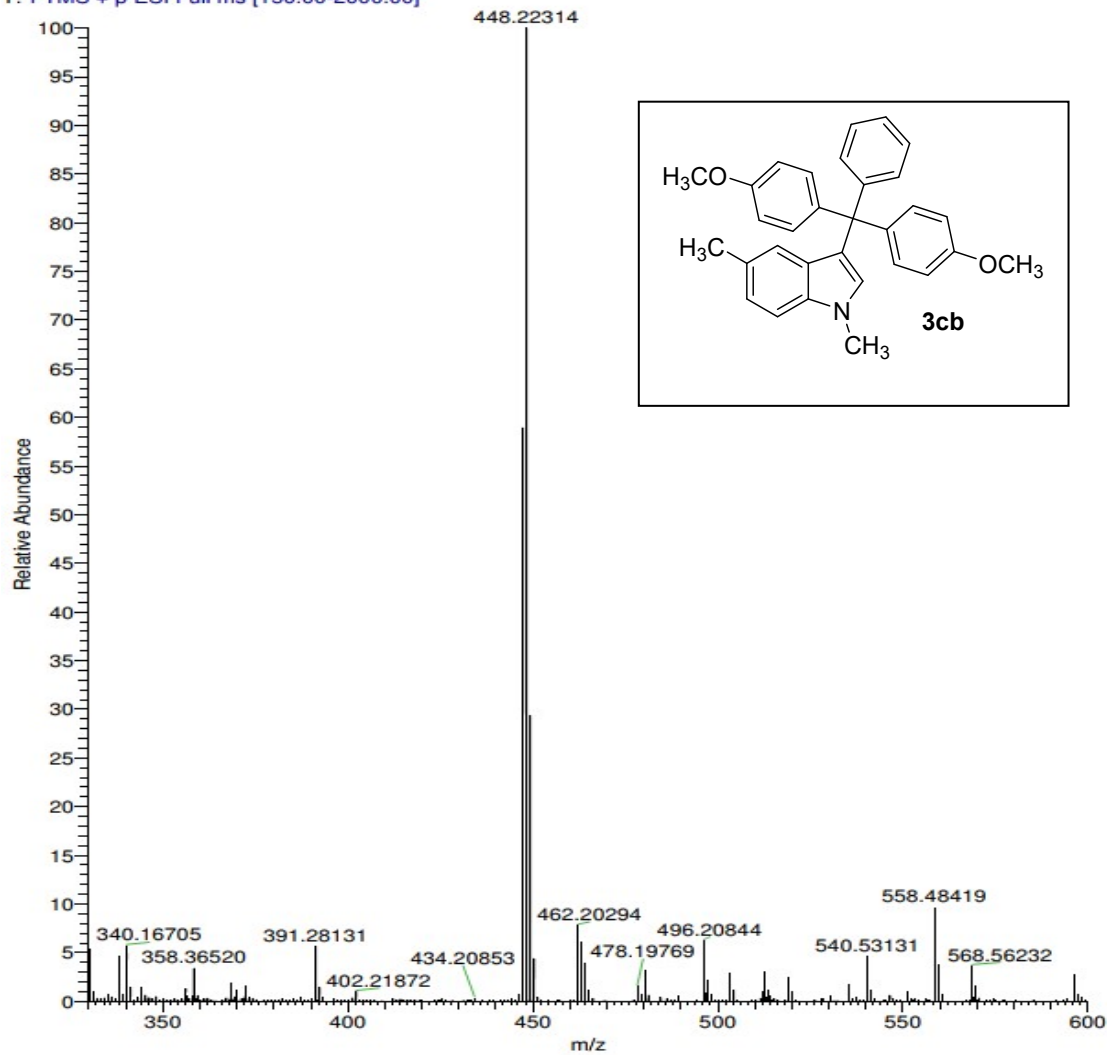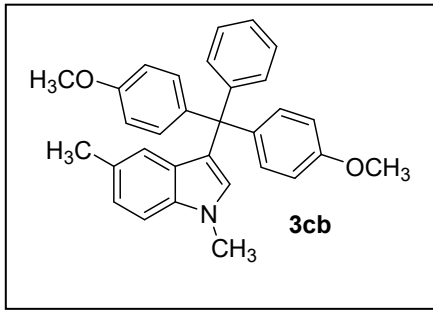



875 #25 RT: 0.34 AV: 1 NL: 2.44E8

T: FTMS + p ESI Full ms [150.00-2000.00]

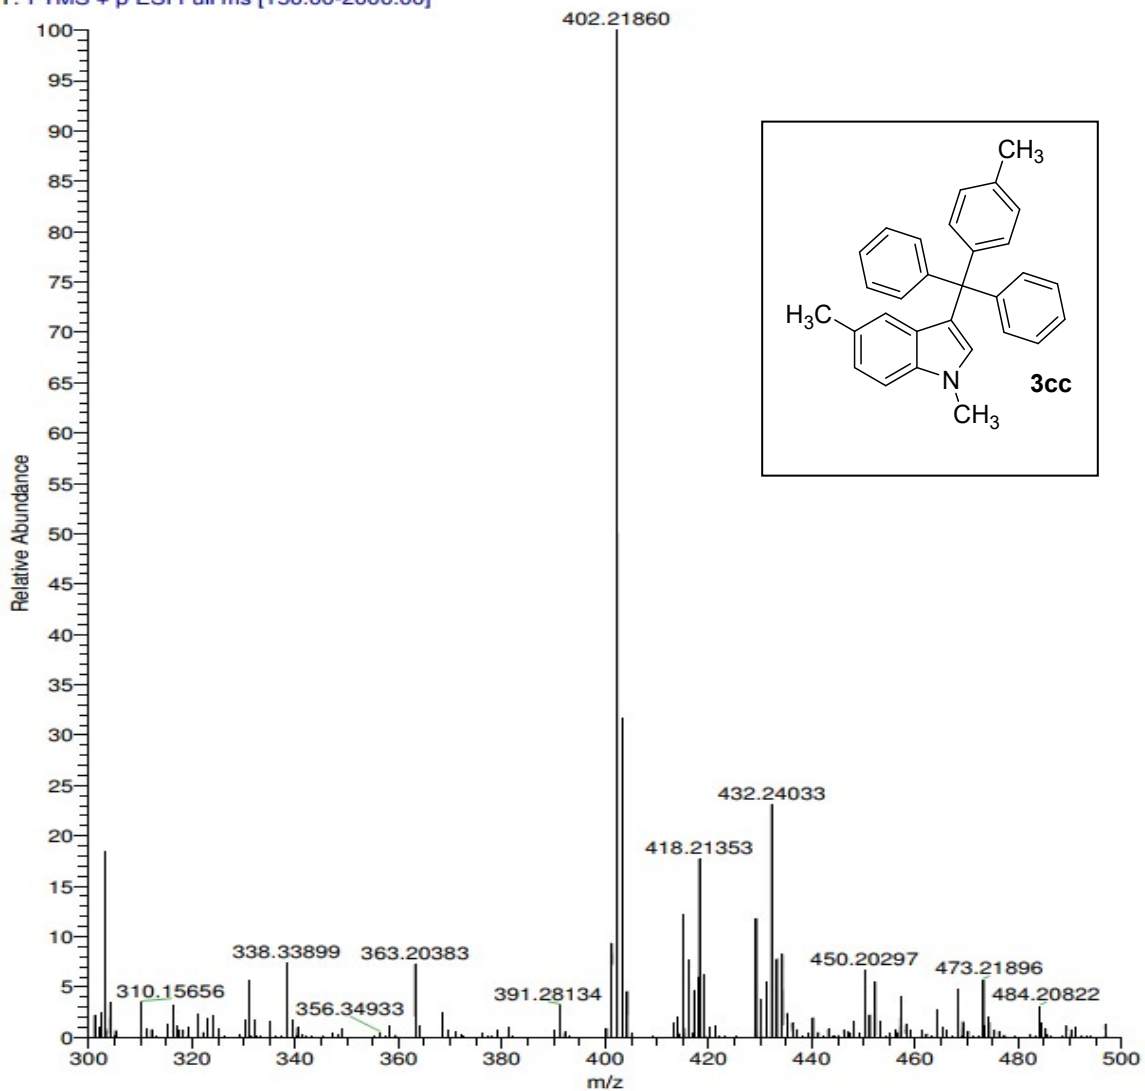

827 #73 RT: 1.01 AV: 1 NL: 5.24E7

T: FTMS + p ESI Full ms [150.00-2000.00]

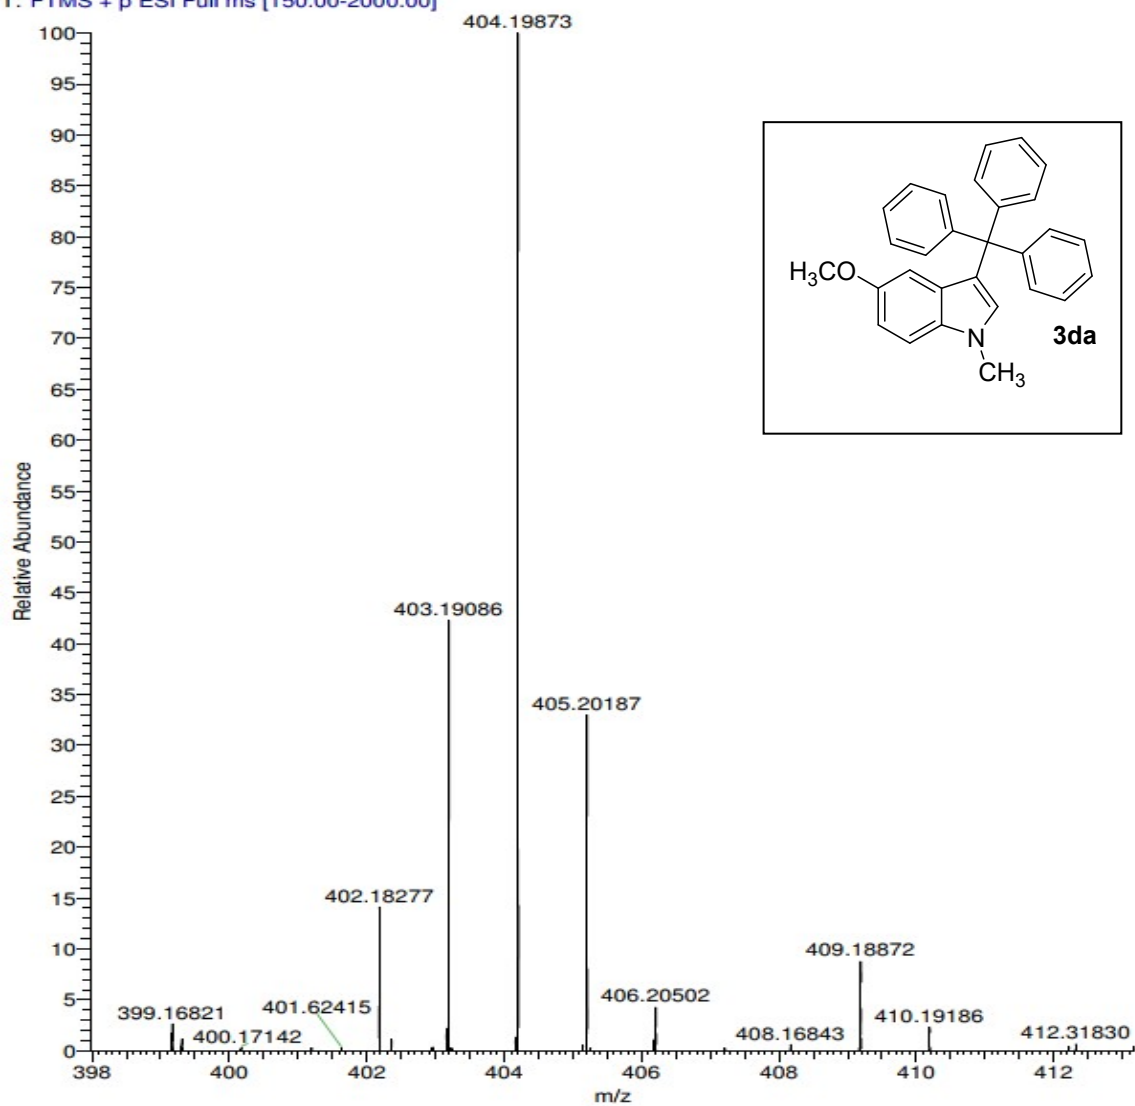

868 #31 RT: 0.42 AV: 1 NL: 4.25E7  
T: FTMS + p ESI Full ms [150.00-2000.00]

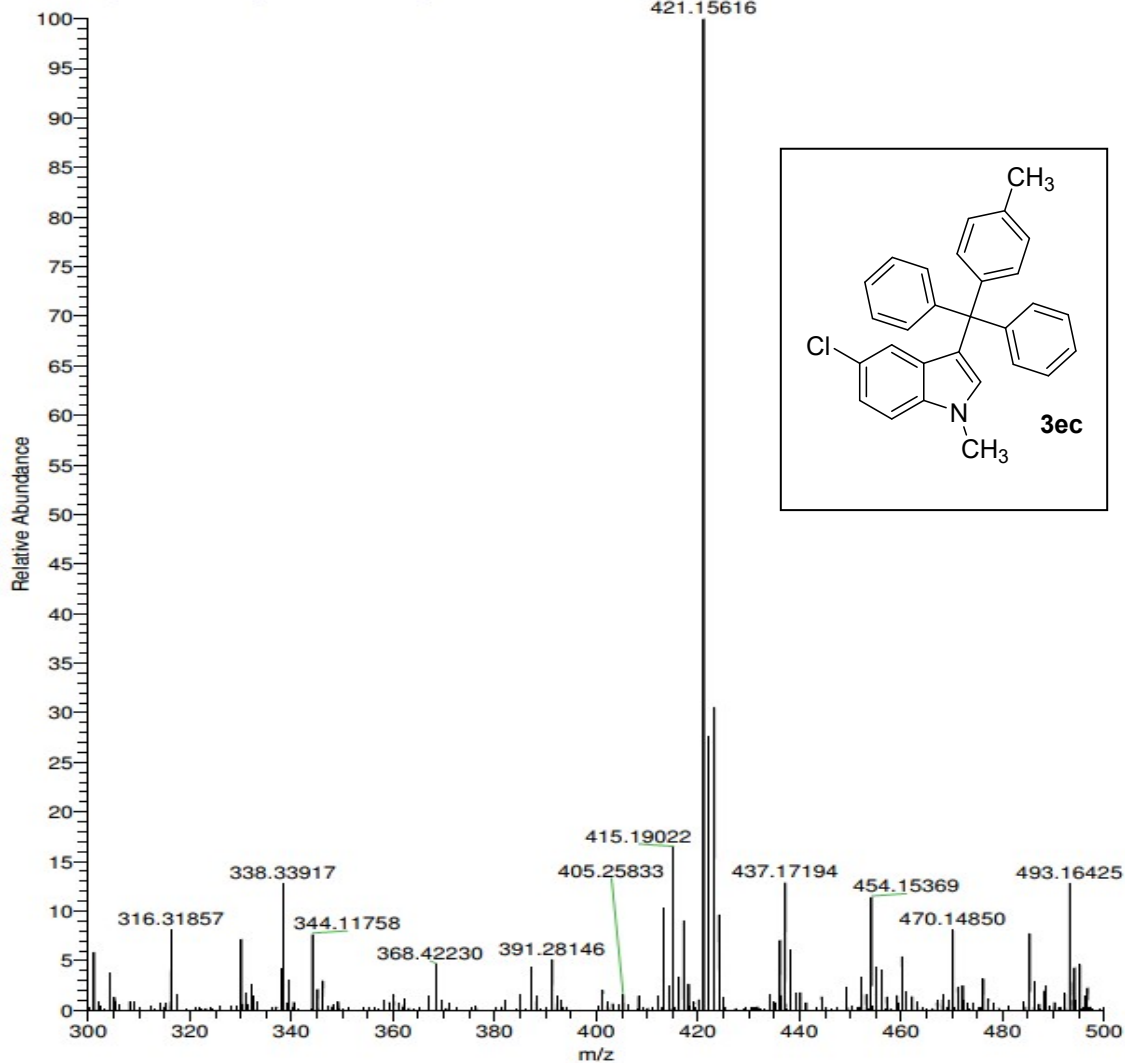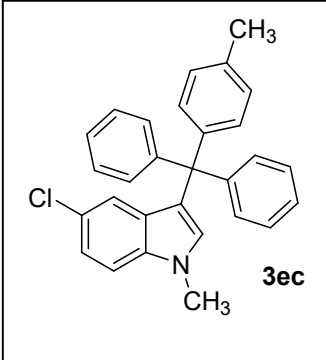

869 #65 RT: 0.90 AV: 1 NL: 1.89E8  
T: FTMS + p ESI Full ms [150.00-2000.00]

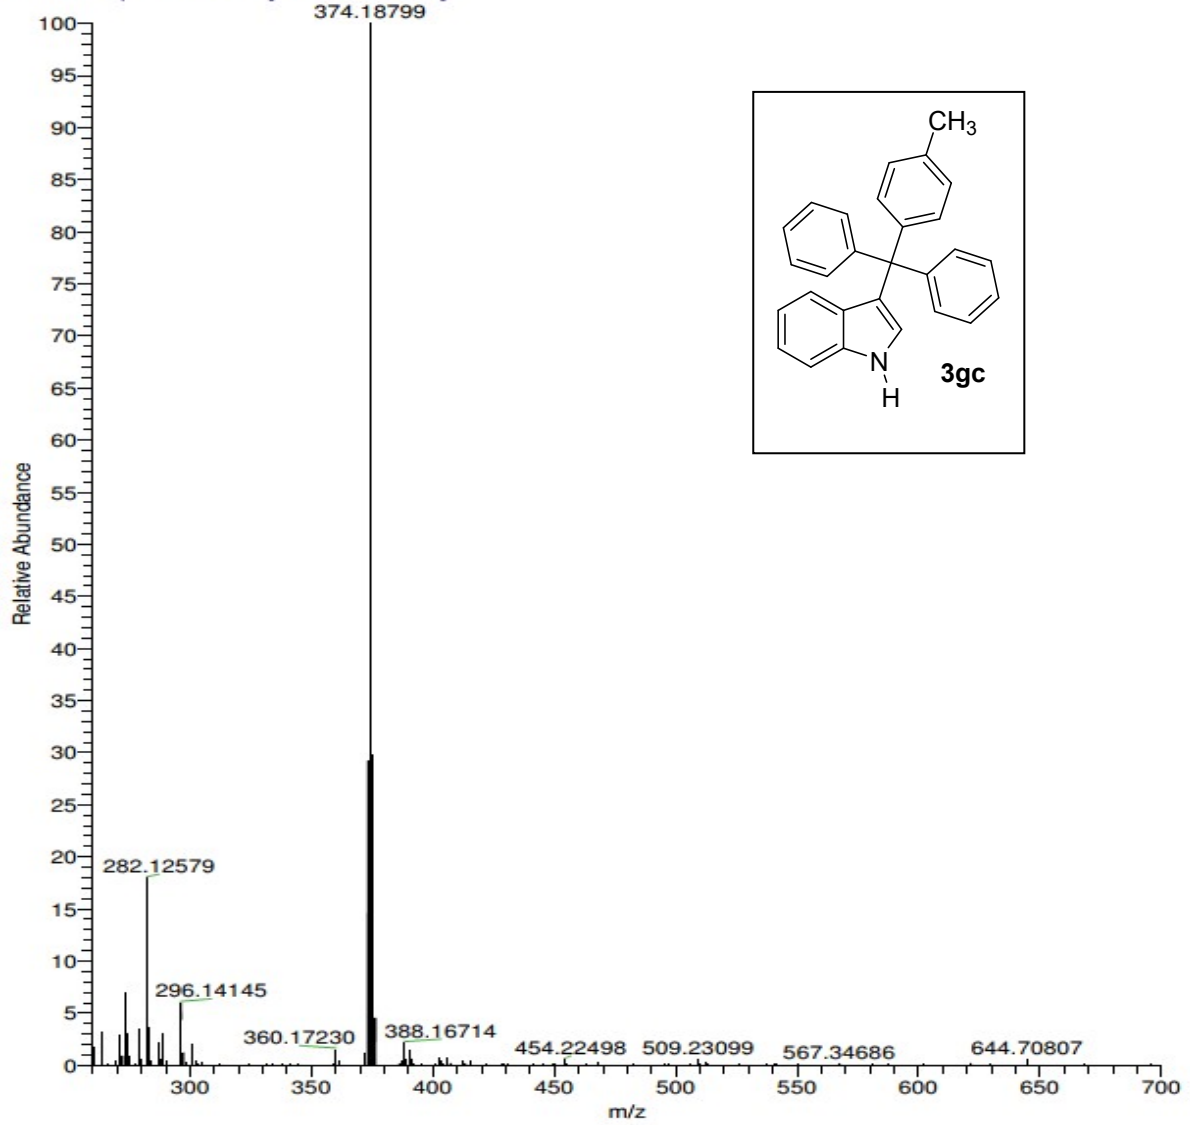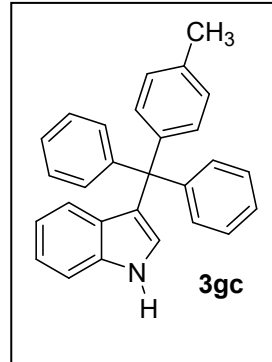

D:\MARCH 2023\A

4/6/2023 1:18:57 PM

A #73 RT: 1.01 AV: 1 NL: 6.52E8  
T: FTMS + p ESI Full ms [150.00-2000.00]

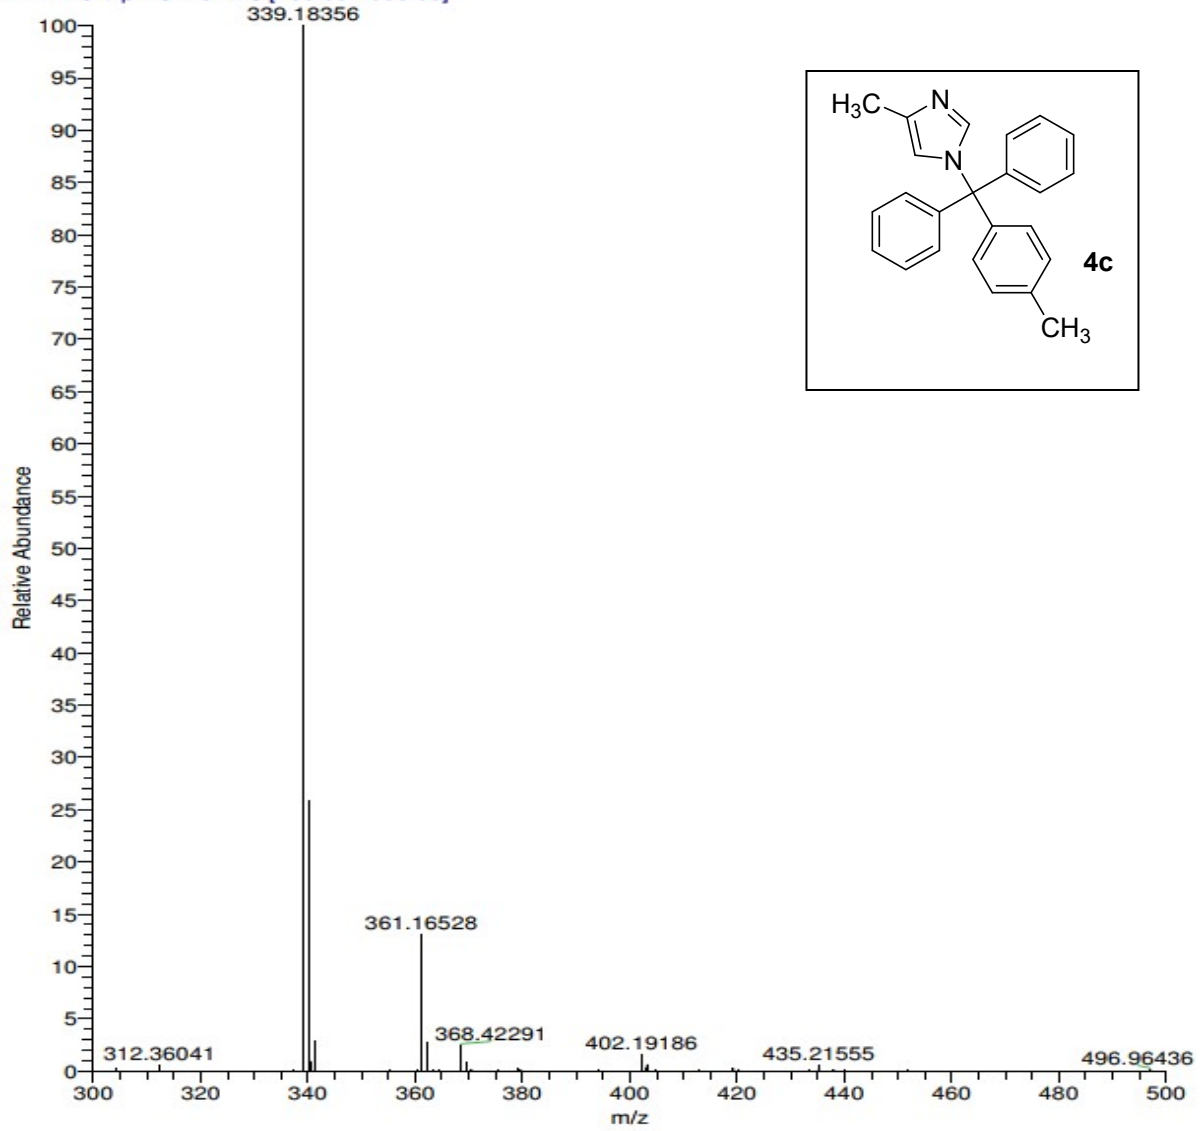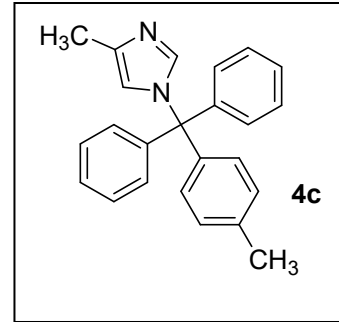

888 #21 RT: 0.28 AV: 1 NL: 1.24E8  
T: FTMS + p ESI Full ms [150.00-2000.00]

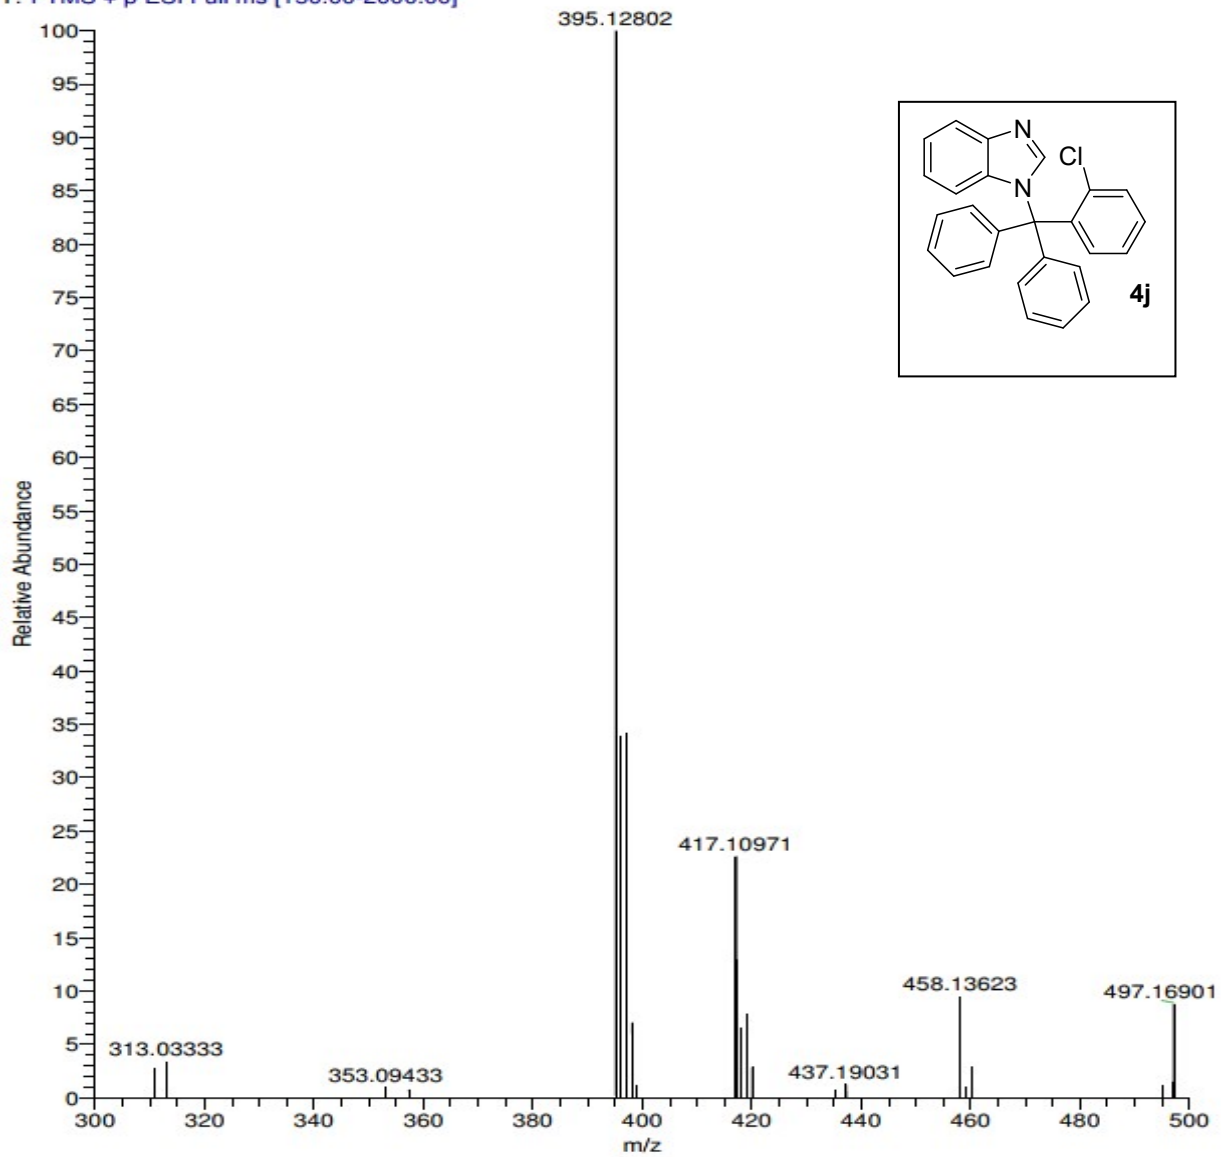

D:\MARCH 2023\B

4/6/2023 12:59:21 PM

B #65 RT: 0.91 AV: 1 NL: 2.53E9  
T: FTMS + p ESI Full ms [150.00-2000.00]

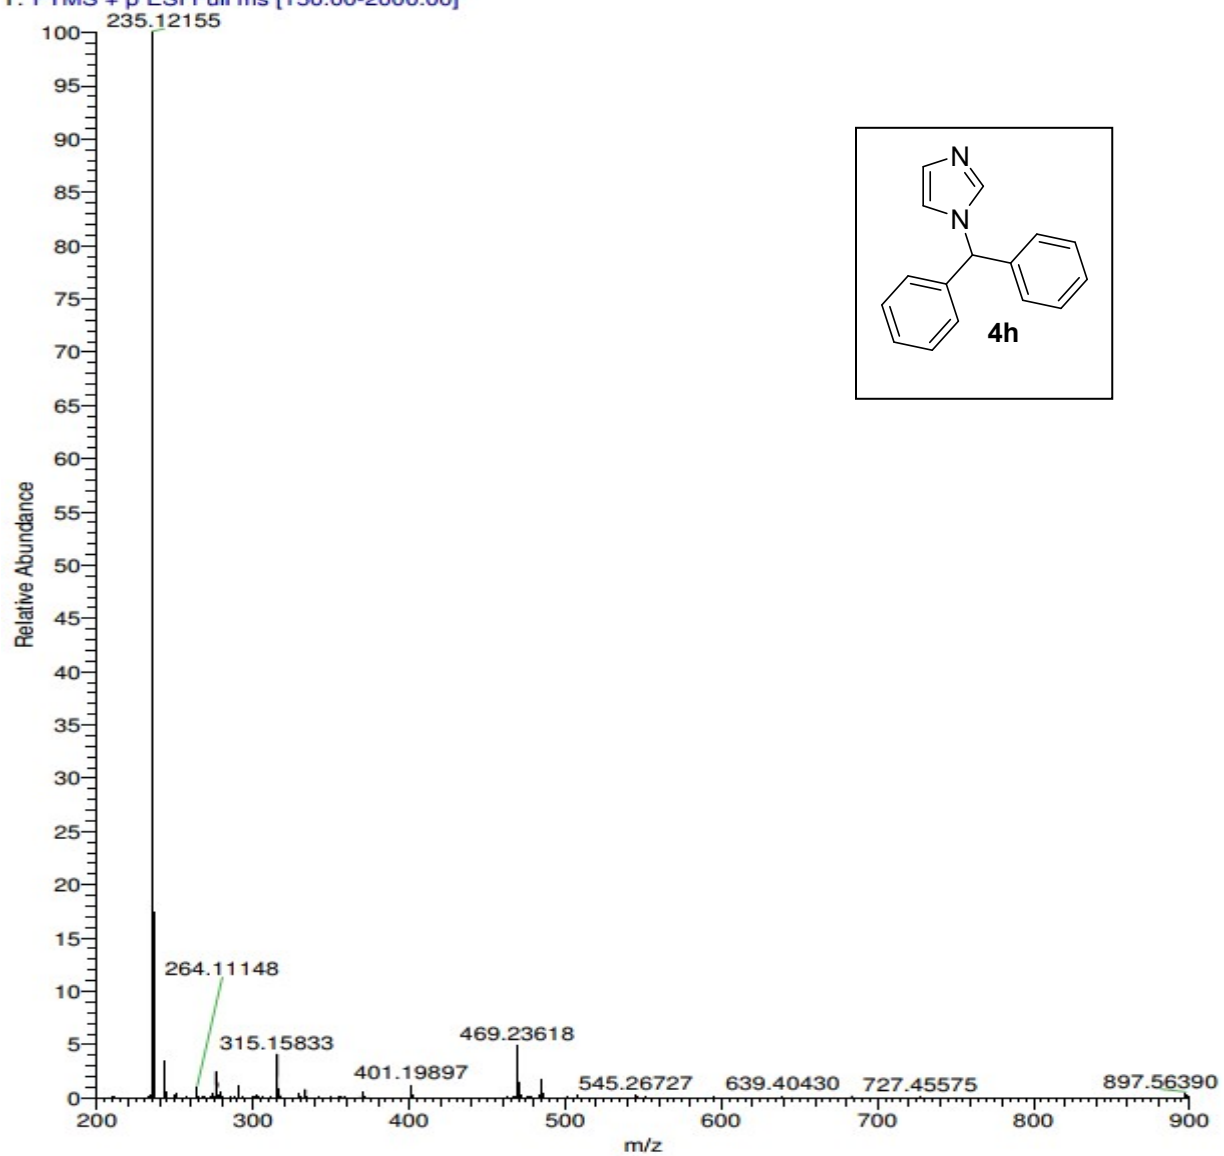

892 #73 RT: 1.01 AV: 1 NL: 1.77E8

T: FTMS + p ESI Full ms [150.00-2000.00]

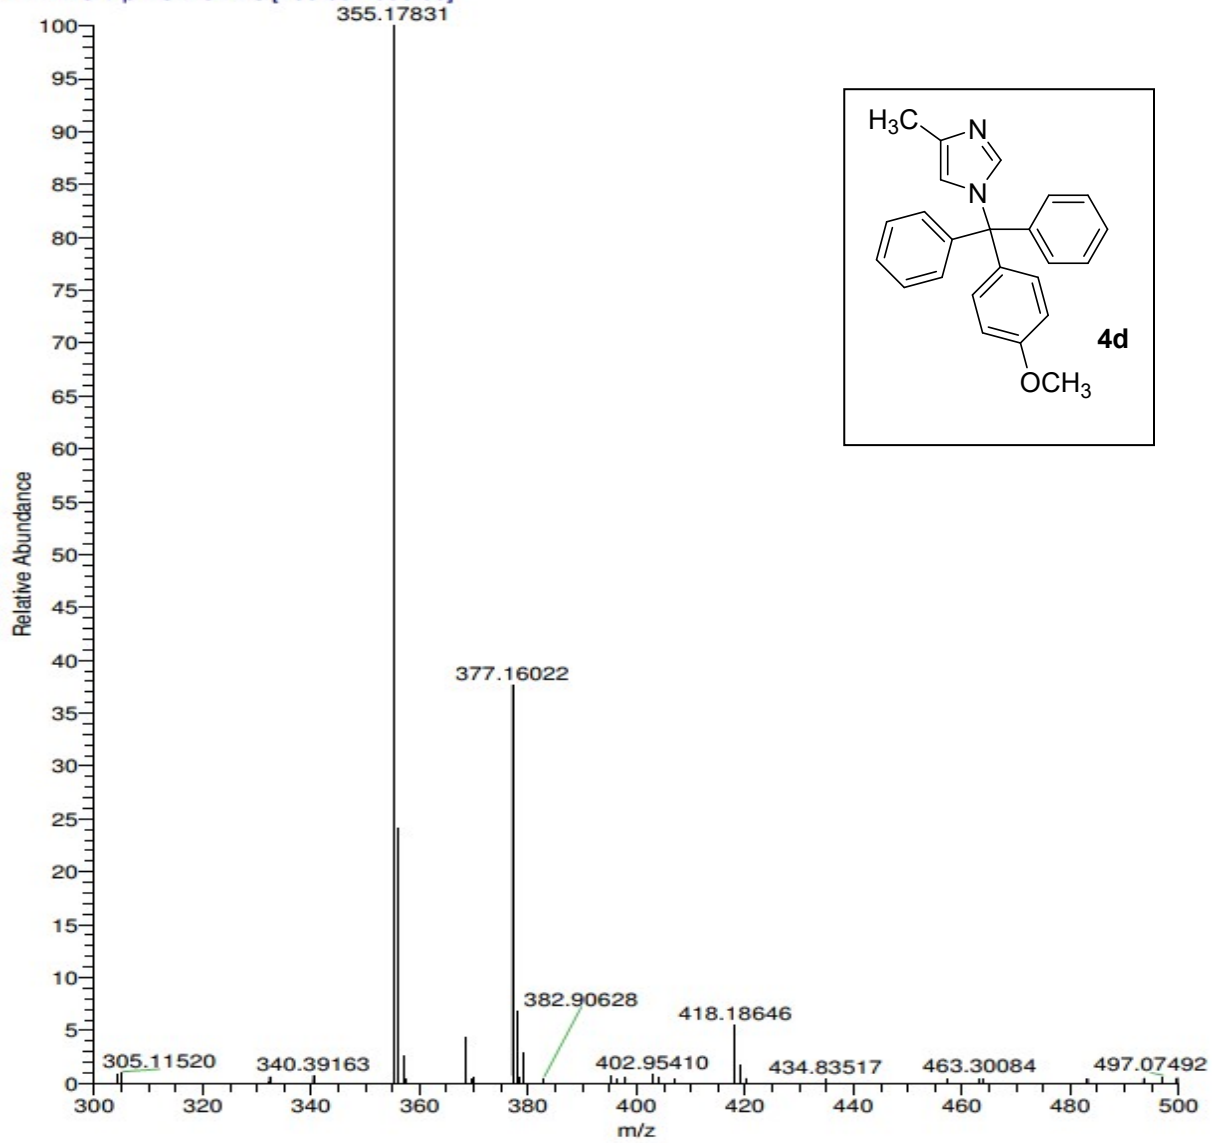



References:

- 1 S. Shirakawa and S. Kobayashi, *Organic Lett.*, 2007, **9**, 311-314.
- 2 H. Hikawa, F. Kotaki, S. Kikkawa and I. Azumaya, *J. Org. Chem.*, 2019, **84**, 1972-1979.
- 3 L. Yu, S. S. Li, W. Li, S. Yu, Q. Liu and J. Xiao, *J. Org. Chem.*, 2018, **83**, 15277-15283.
- 4 J. Lv, Q. Zhang, X. Zhong and S. Luo, *J. Am. Chem. Soc.*, 2015, **137**, 15576-15583.
- 5 D. F. Skurydina, T. G. Nikolaeva, V. I. Sheichenko and V. N. Tolkachev, *Pharm. Chem. J.*, 1994, **28**, 804-807.
- 6 M. Buchholz, A. Hamann, S. Aust, W. Brandt, L. Böhme, T. Hoffmann, S. Schilling, H. U. Demuth and U. Heiser, *J. Med. Chem.*, 2009, **52**, 7069-7080.
- 7 S. B. Bodendiek, C. Rubinos, M. P. Trelles, N. Coleman, D. P. Jenkins, H. Wulff and M. Srinivas, *Front. Pharmacol.*, 2012, **3**, 106.
- 8 Y. Yang, G. B. Hammond and T. Umemoto, *Angew. Chem. Int. Ed.*, 2022, **61**, 202211688.
- 9 R. S. Pottorf and S. Shakya, 1'-Thionylimidazole. *Encyclopedia of Reagents for Organic Synthesis*, 2001.
- 10 S. Khabnadideh, Z. Rezaei, A. Khalafi-Nezhad, K. Pakshir, A. Roosta and Z. Baratzadeh, *Anti-Infective Agents in Medicinal Chemistry (Formerly Current Medicinal Chemistry-Anti-Infective Agents)*, 2008, **7**, 215-218.
- 11 L. V. Myznikov, T. V. Artamonova, V. K. Bel'skii, A. I. Stash, N. K. Skvortsov and G. I. Koldobskii, *Russ. J. Org. Chem.*, 2002, **38**, 1360-1369.
